# Supplementary material for: Cp*Co(iii)-catalyzed C–H amination/annulation cascade of sulfoxonium ylides with anthranils for the synthesis of indoloindolones
Source: Royal Society of Chemistry journal article supplement (doi:10.1039/d1cc02817k), 2021-01-01

# ***Cp\*Co(III)-Catalyzed C–H Amination/Annulation Cascade of Sulfoxonium Ylides with Anthranils for the Synthesis of Indoloindolones***

*Yogesh N. Aher and Amit B. Pawar\**

*School of Basic Sciences, Indian Institute of Technology Mandi, Kamand,  
Himachal Pradesh 175075, India*

|                                                                                                                         |             |
|-------------------------------------------------------------------------------------------------------------------------|-------------|
| <b>Table of Content</b>                                                                                                 | <b>S-1</b>  |
| <b>1. General Methods</b>                                                                                               | <b>S-2</b>  |
| <b>2. Experimental Procedure of the Optimization Study</b>                                                              | <b>S-3</b>  |
| <b>3. H/D Exchange Experiment</b>                                                                                       | <b>S-4</b>  |
| <b>4. Intermolecular Competitive Experiment</b>                                                                         | <b>S-6</b>  |
| <b>5. Kinetic Isotope Effect Experiments</b>                                                                            | <b>S-7</b>  |
| <b>6. General Procedure for the Co-Catalyzed C–H Amination/Annulation Cascade for the Synthesis of Indoloindolones.</b> | <b>S-9</b>  |
| <b>Spectroscopic Data of Indoloindolones Obtained in this Study</b>                                                     | <b>S-9</b>  |
| <b>7. References</b>                                                                                                    | <b>S-18</b> |
| <b>8. X-ray Structures</b>                                                                                              | <b>S-19</b> |
| <b>9. Appendix</b>                                                                                                      | <b>S-21</b> |
| Spectral Copies of <sup>1</sup> H and <sup>13</sup> C NMR of Compounds Obtained in this Study                           |             |

## ***1. General Methods***

Unless otherwise stated, all commercial reagents and solvents were used without additional purification. Analytical thin layer chromatography (TLC) was performed on precoated silica gel 60 F254 plates. Visualization via TLC was achieved by the use of UV light (254 nm). Column chromatography was undertaken on silica gel (100–200 mesh) using a proper eluent system. NMR spectra were recorded in chloroform-d at 300, 400 or 500 MHz for  $^1\text{H}$  NMR spectra and 75, 100 or 125 MHz for  $^{13}\text{C}$  NMR spectra. Chemical shifts are quoted in parts per million referenced to the appropriate solvent peak or 0.0 ppm for tetramethylsilane. The following abbreviations were used to describe peak splitting patterns when appropriate: br = broad, s = singlet, d = doublet, t = triplet, q = quartet, dd = doublet of doublet, m = multiplet. Coupling constants,  $J$ , are reported in hertz. For  $^{13}\text{C}$  NMR, chemical shifts are reported in parts per million referenced to the center of a triplet at 77.0 ppm of chloroform-d. HRMS spectra were recorded using ESI-TOF techniques. The sulfoxonium ylides<sup>1</sup> and anthranils<sup>2</sup> were prepared according to the procedure described in the literature.

## 2. Experimental Procedure of the Optimization Study

To a screw capped vial with a spinvane triangular-shaped Teflon stirbar were added Sulfoxonium ylide **1a** (19.6 mg, 0.10 mmol), Anthranil **2a** (17.9 mg, 0.15 mmol), [Cp\*Co(CO)I<sub>2</sub>] (4.8 mg, 10 mol %), additive, and solvent (0.6 mL) under N<sub>2</sub> atmosphere. The reaction mixture was stirred at 110 °C for 12 h. After indicated time, cooled to room temperature and the reaction mixture was filtered through a pad of celite and the celite pad was washed with CH<sub>2</sub>Cl<sub>2</sub> (10 mL × 2). Solvents were removed under reduced pressure and crude yield was measured by <sup>1</sup>H NMR using an internal standard (1,1,2,2-tetrachloroethane).

**Table S1.** Optimization of the Co-Catalyzed C–H Functionalization of Sulfoxonium Ylides<sup>a</sup>

Reaction scheme: **1a** + **2a**  $\xrightarrow[\text{additive, solvent}]{[\text{Cp}^*\text{Co}(\text{CO})\text{I}_2] (10 \text{ mol } \%), \text{Ag (I) salt} (20 \text{ mol } \%), 110 \text{ }^\circ\text{C}, 12 \text{ h}}$  **3aa**

| Entry             | Ag(I) salt (20 mol %) | Additive (equiv.)         | Solvent     | Yield (%) <sup>b</sup> |
|-------------------|-----------------------|---------------------------|-------------|------------------------|
| 1                 | AgSbF <sub>6</sub>    | -                         | DCE         | n.d.                   |
| 2                 | AgSbF <sub>6</sub>    | NaOAc (2.0)               | DCE         | n.d.                   |
| 3                 | AgSbF <sub>6</sub>    | KOAc (2.0)                | DCE         | n.d.                   |
| 4                 | AgSbF <sub>6</sub>    | AcOH (2.0)                | DCE         | 58                     |
| 5                 | AgSbF <sub>6</sub>    | PhCO <sub>2</sub> H (2.0) | DCE         | 48                     |
| 6                 | AgSbF <sub>6</sub>    | PivOH (2.0)               | DCE         | 65                     |
| 7                 | AgSbF <sub>6</sub>    | AdCO <sub>2</sub> H (2.0) | DCE         | 70                     |
| 8                 | AgNTf <sub>2</sub>    | AdCO <sub>2</sub> H (2.0) | DCE         | 62                     |
| 9                 | AgOTf                 | AdCO <sub>2</sub> H (2.0) | DCE         | 54                     |
| 10 <sup>c</sup>   | AgSbF <sub>6</sub>    | AdCO <sub>2</sub> H (2.0) | DCE         | 91                     |
| 11 <sup>c</sup>   | AgSbF <sub>6</sub>    | AdCO <sub>2</sub> H (1.0) | DCE         | 89                     |
| 12 <sup>c</sup>   | AgSbF <sub>6</sub>    | AdCO <sub>2</sub> H (1.0) | MeOH        | n.d.                   |
| 13 <sup>c</sup>   | AgSbF <sub>6</sub>    | AdCO <sub>2</sub> H (1.0) | Toluene     | 43                     |
| 14 <sup>c</sup>   | AgSbF <sub>6</sub>    | AdCO <sub>2</sub> H (1.0) | 1,4-Dioxane | trace                  |
| 15 <sup>c,d</sup> | -                     | AdCO <sub>2</sub> H (1.0) | DCE         | 65                     |
| 16 <sup>c,e</sup> | AgSbF <sub>6</sub>    | AdCO <sub>2</sub> H (1.0) | DCE         | n.d.                   |
| 17 <sup>c</sup>   | -                     | AdCO <sub>2</sub> H (1.0) | DCE         | n.d.                   |

<sup>a</sup>Reaction conditions: **1a** (0.10 mmol), **2a** (0.15 mmol), [Cp\*Co(CO)I<sub>2</sub>] (10 mol %), Ag (I) Salt (20 mol %) and additive in solvent (0.6 mL) at 100 °C for 12 h. <sup>b</sup>Yields are based on crude <sup>1</sup>H NMR (internal standard: 1,1,2,2-tetrachloroethane). <sup>c</sup>Reaction run at 110 °C. <sup>d</sup>Using [Cp\*Co(MeCN)<sub>3</sub>](SbF<sub>6</sub>)<sub>2</sub> (10 mol %). <sup>e</sup>Without [Cp\*Co(CO)I<sub>2</sub>]. n.d. = not detected. AdCO<sub>2</sub>H = 1-Admantanecarboxylic acid

### 3. H/D Exchange Experiment

#### Cobalt-Catalyzed H/D Exchange in Sulfoxonium ylide **1b** with CD<sub>3</sub>COOD as an additive in the absence of **2a**.

To a dried screw capped vial with a spinvane triangular-shaped Teflon stirbar were added **1b** (21.0 mg, 0.10 mmol), [Cp\*Co(CO)I<sub>2</sub>] (4.8 mg, 10 mol %), AgSbF<sub>6</sub> (6.8 mg, 20 mol %), CD<sub>3</sub>COOD (2.0 equiv) and 1,2-DCE (0.6 mL) under N<sub>2</sub> atmosphere. The reaction mixture was stirred at 110 °C for 15 min, cooled to room temperature, filtered through a pad of celite and the celite pad was washed with CH<sub>2</sub>Cl<sub>2</sub> (10 mL × 2). The solvent was removed under reduced pressure and the crude residue was purified by column chromatography on silica gel to furnish the product [D]<sub>n</sub>-**1b** (16 mg, 81%) and the extents of deuterium incorporation was measured by <sup>1</sup>H NMR analysis.

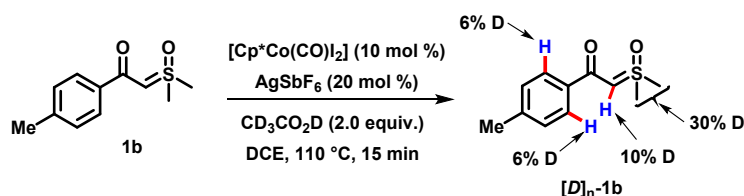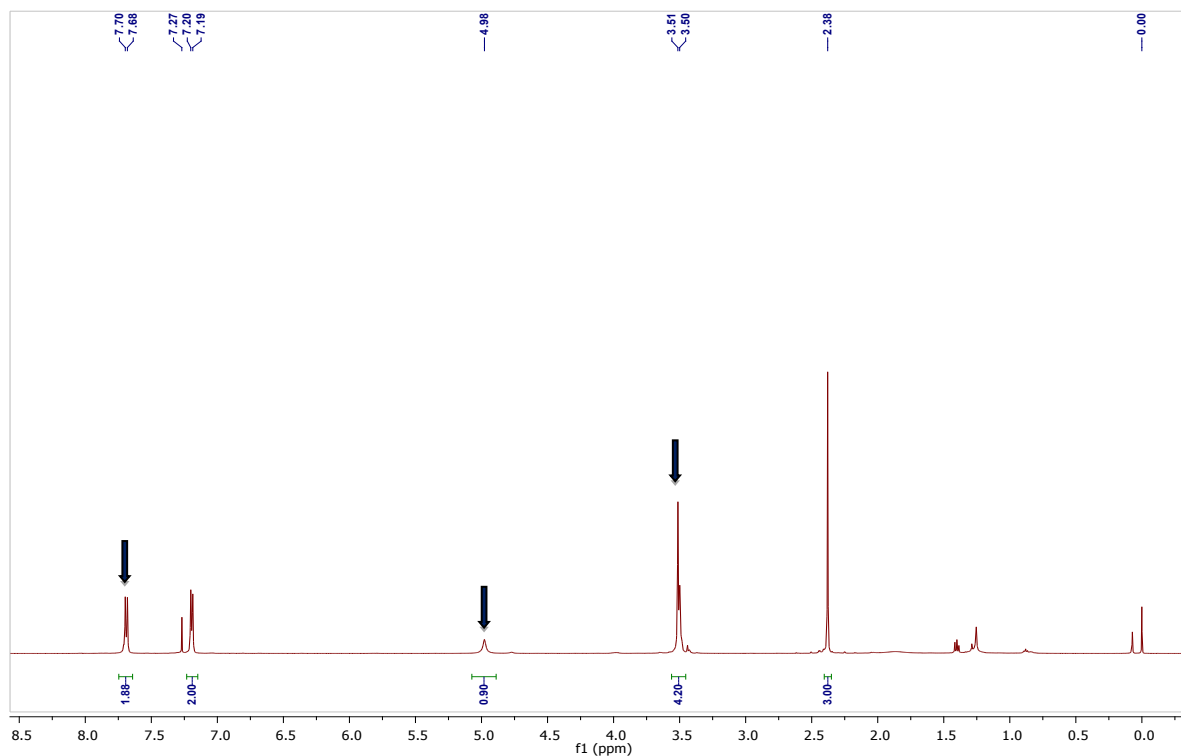

**Figure S1.** Crude <sup>1</sup>H NMR for H/D exchange experiment of **1b** with CD<sub>3</sub>COOD in absence of **2a**

### 3. H/D Exchange Experiment

#### Cobalt-Catalyzed H/D Exchange in Sulfoxonium ylide **1k** with CD<sub>3</sub>COOD as an additive in the presence of **2a**.

To a dried screw capped vial with a spinvane triangular-shaped Teflon stirbar were added **1k** (63.0 mg, 0.30 mmol), anthranil **2a** (53.6 mg, 0.45 mmol), [Cp\*Co(CO)I<sub>2</sub>] (14.4 mg, 10 mol %), AgSbF<sub>6</sub> (20.4 mg, 20 mol %), AdCO<sub>2</sub>H (54.0 mg, 1.0 equiv), CD<sub>3</sub>CO<sub>2</sub>D (38.4 mg, 2 equiv) and 1,2-DCE (2.0 mL) under N<sub>2</sub> atmosphere. The reaction mixture was stirred at 110 °C for 12 h, cooled to room temperature, filtered through a pad of celite and then washed with EtOAc (10 mL × 3). The solvent was removed under reduced pressure and the crude residue was purified by column chromatography on silica gel to furnish the product [**D**]<sub>n</sub>-**3ka** (27 mg, 38 %) and the extents of deuterium incorporation was measured by <sup>1</sup>H NMR analysis.

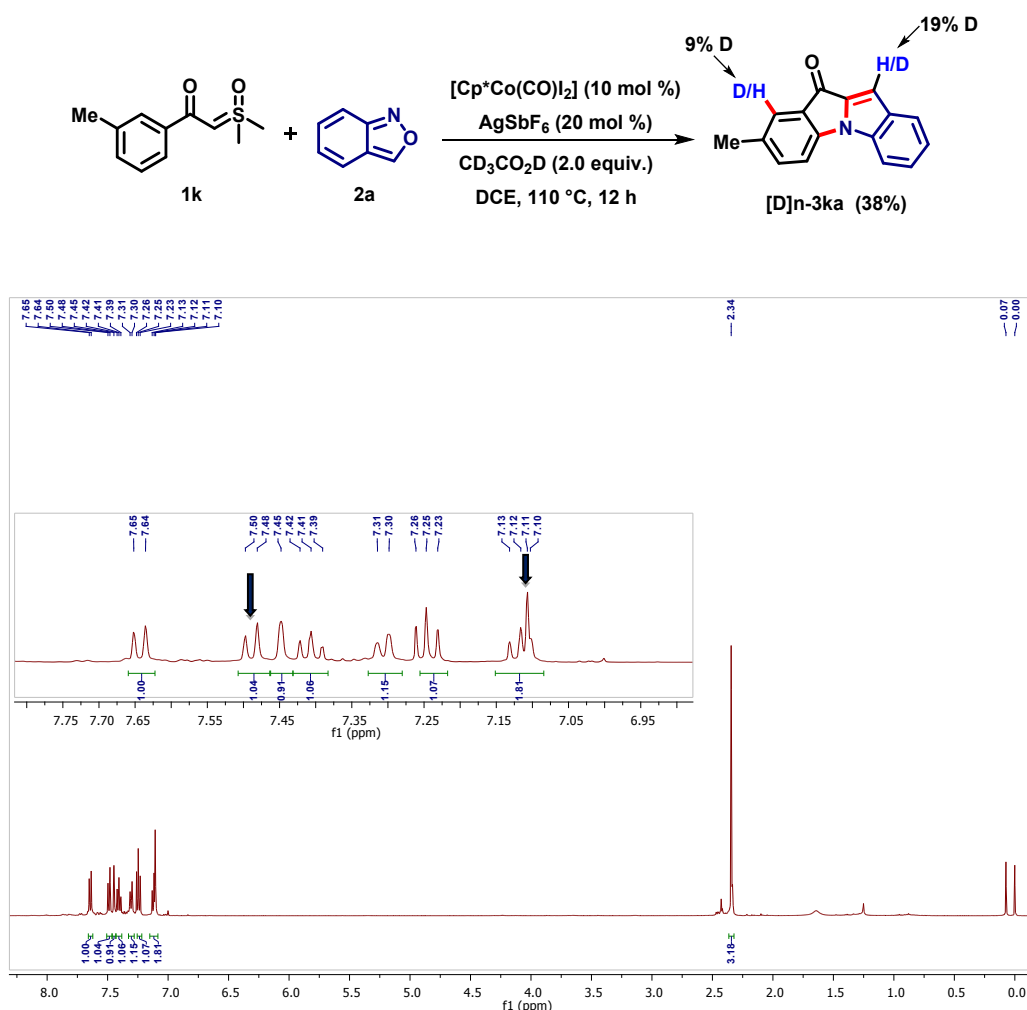

**Figure S2.** <sup>1</sup>H NMR for H/D exchange experiment of **1k** with CD<sub>3</sub>COOD in presence of **2a**

#### 4. Intermolecular Competitive Experiment

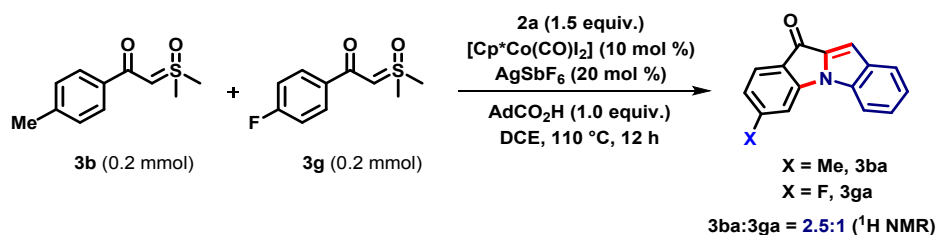

To a dried screw capped vial with a spinnane triangular-shaped Teflon stirbar were added **3b** (42.0 mg, 0.20 mmol), **3g** (42.9 mg, 0.20 mmol), anthranil **2a** (35.7 mg, 0.30 mmol),  $[\text{Cp}^*\text{Co(CO)I}_2]$  (9.6 mg, 10 mol %),  $\text{AgSbF}_6$  (13.6 mg, 20 mol %),  $\text{AdCO}_2\text{H}$  (36.0 mg, 1.0 equiv) and 1,2-DCE (1.2 mL) under  $\text{N}_2$  atmosphere. The reaction mixture was stirred in a pre-heated oil bath at 110  $^\circ\text{C}$  for 12 h. The reaction mixture was cooled to room temperature, filtered through a pad of celite and then the celite pad was washed with  $\text{CH}_2\text{Cl}_2$  (15 mL  $\times$  2). The combined organic layers were removed under reduced pressure. The crude residue was purified by column chromatography on silica gel and ratio of the products **3ba** and **3ga** was measured by  $^1\text{H}$  NMR analysis which was found to be 2.5:1.

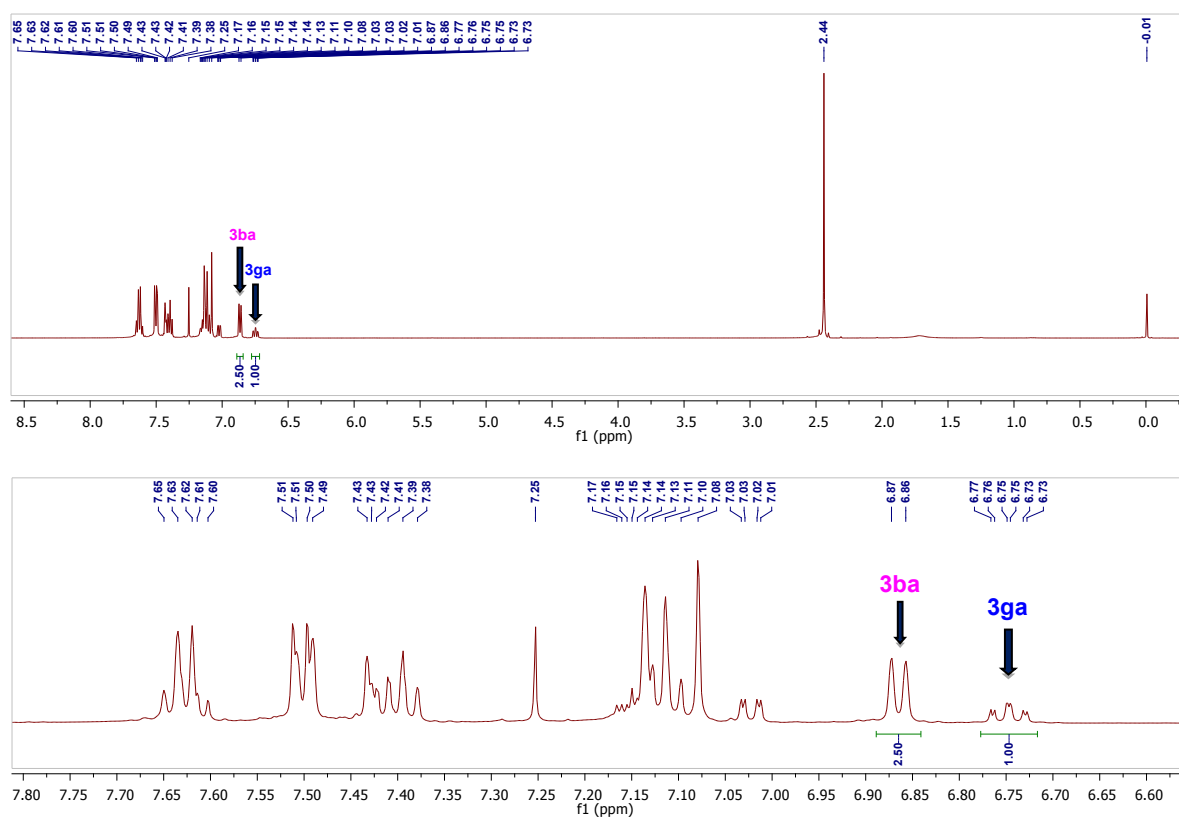

**Figure S3.**  $^1\text{H}$  NMR for intermolecular competitive experiment between **3b** and **3g**

## 5. Intermolecular Kinetic Isotope Effect Experiments (Scheme 5c)

### a) The Parallel Reaction.

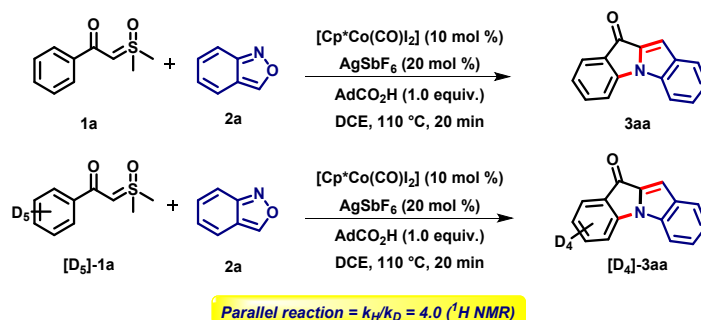

Sulfoxonium ylide **1a** (19.6 mg, 0.10 mmol) or Sulfoxonium ylide- $d_5$  **[D<sub>5</sub>]-1a** (20.1 mg, 0.10 mmol) were added to two separate screw capped vials with spinnvane triangular-shaped Teflon stirbar followed by anthranil **2a** (17.9 mg, 0.15 mmol),  $[\text{Cp}^*\text{Co}(\text{CO})\text{I}_2]$  (4.8 mg, 10 mol %),  $\text{AgSbF}_6$  (6.8 mg, 20 mol %),  $\text{AdCO}_2\text{H}$  (18.0 mg, 1.0 equiv) and 1,2-DCE (0.6 mL) under  $\text{N}_2$  atmosphere. These two reaction mixtures were stirred side-by-side at 110 °C for 20 min. Then, these two mixtures were rapidly combined and the combined mixture was poured into water (20 mL) and extracted with EtOAc ( $2 \times 15$  mL). The combined organics were dried ( $\text{Na}_2\text{SO}_4$ ), and concentrated in vacuo. The residue was purified by column chromatography to afford the desired **3aa** and **[D<sub>4</sub>]-3aa**.  $\text{KIE} = 4.0$ .

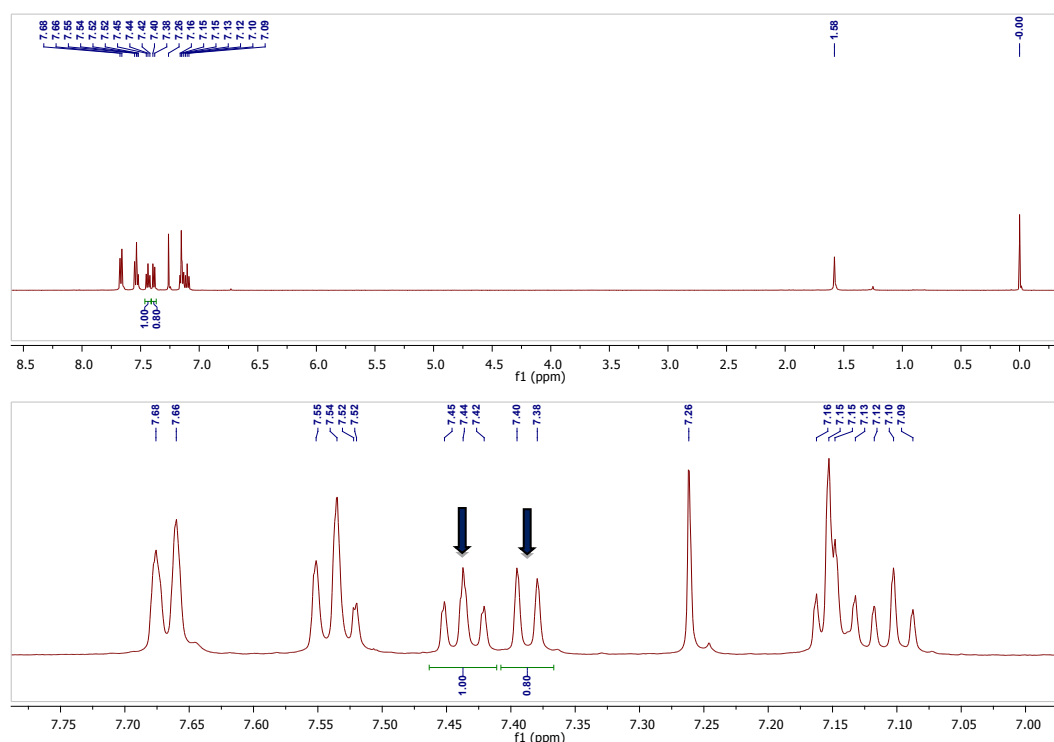

**Figure S4.**  $^1\text{H}$  NMR for KIE Study (Parallel Reactions)

## 5. Kinetic Isotope Effect Experiments (Scheme 5c)

### a) The Competitive Reaction

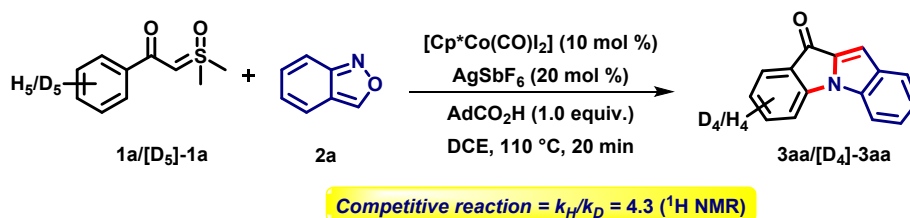

To a dried screw capped vial with a spinvane triangular-shaped Teflon stirbar were added **1a** (19.6 mg, 0.10 mmol), **[D<sub>5</sub>]-1a** (20.1 mg, 0.10 mmol), anthranil **2a** (17.9 mg, 0.15 mmol),  $[\text{Cp}^*\text{Co}(\text{CO})\text{I}_2]$  (4.8 mg, 10 mol %),  $\text{AgSbF}_6$  (6.8 mg, 20 mol %),  $\text{AdCO}_2\text{H}$  (18.0 mg, 1.0 equiv) and 1,2-DCE (0.6 mL) under  $\text{N}_2$  atmosphere. The reaction mixture was heated at 110 °C for 20 min. The reaction mixture was cooled to room temperature and diluted with water (20 mL) and extracted with EtOAc ( $2 \times 15$  mL). The combined organics were dried ( $\text{Na}_2\text{SO}_4$ ), and concentrated in vacuo. The residue was purified by column chromatography to afford the desired **3aa** and **[D<sub>4</sub>]-3aa**. KIE = 4.3.

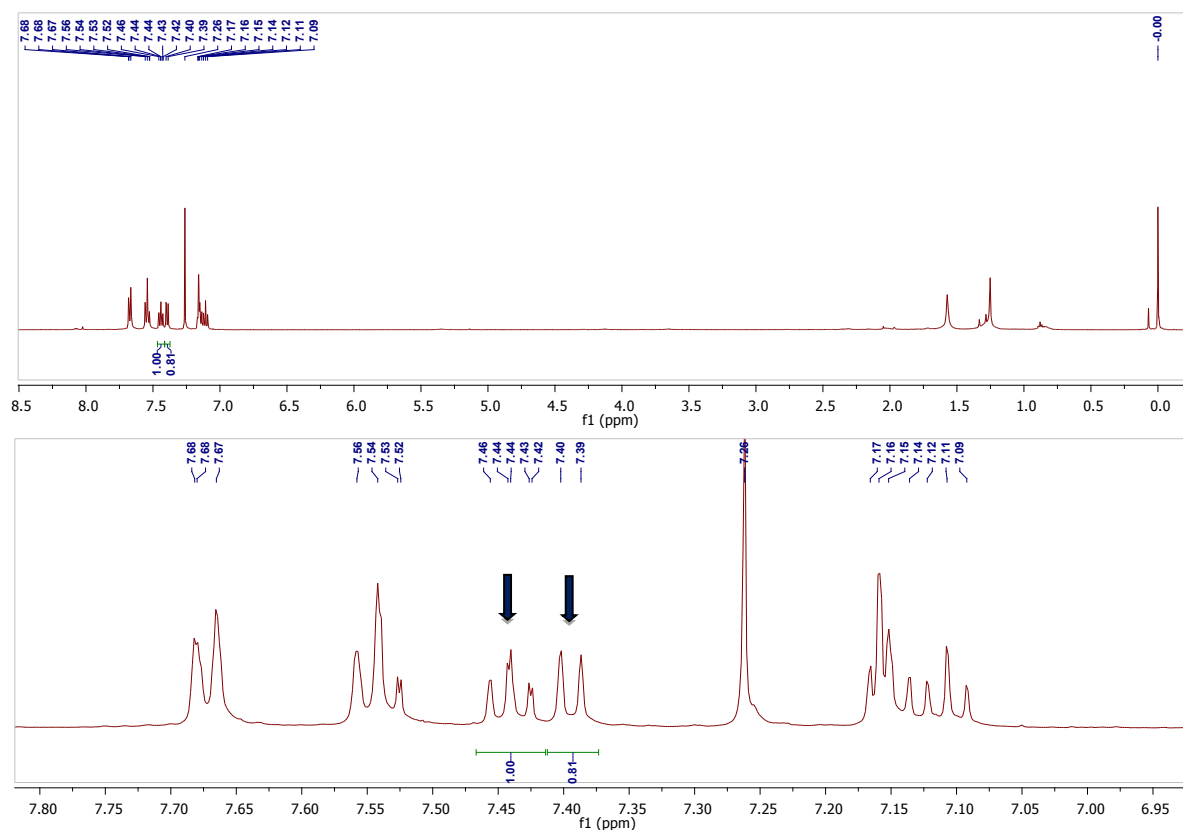

Figure S5.  $^1\text{H}$  NMR for KIE Study (Competitive Reaction)

## 6. General Procedure for the Co-Catalyzed C–H Amination/Annulation Cascade for the Synthesis of Indoloindolones.

To a screw capped seal tube vial with a Teflon stirbar were added sulfoxonium ylide **1** (0.30 mmol), anthranil **2** (0.45 mmol, 1.5 equiv), [Cp\*Co(CO)I<sub>2</sub>] (14.4 mg, 10 mol %), AdCO<sub>2</sub>H (54.0 mg, 1.0 equiv.), and 1,2-DCE (2.0 mL) under N<sub>2</sub> atmosphere. The reaction mixture was stirred at 110 °C for 12 h, filtered through a pad of celite and then the celite pad was washed with CH<sub>2</sub>Cl<sub>2</sub> (20 mL × 2). The solvents were removed under reduced pressure and the residue was purified by column chromatography on silica gel (*n*-hexane/EtOAc) to give the desired Indoloindolones derivatives.

## 7. Spectroscopic Data of Indoloindolones Obtained in this Study

### 10*H*-Indolo[1,2-*a*]indol-10-one (**3aa**).<sup>3</sup>

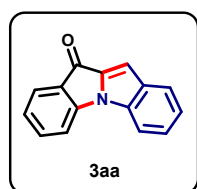

Yellow solid (55.0 mg, 84%); m.p. 160 – 162 °C; <sup>1</sup>H NMR (400 MHz, CDCl<sub>3</sub>) δ 7.63 (d, *J* = 7.9 Hz, 2H), 7.54 – 7.45 (m, *J* = 7.8 Hz, 2H), 7.40 (t, *J* = 7.7 Hz, 1H), 7.33 (d, *J* = 7.9 Hz, 1H), 7.16 – 7.01 (m, 2H), 7.07 (t, *J* = 7.5 Hz, 1H); <sup>13</sup>C NMR (100 MHz, CDCl<sub>3</sub>) δ 181.6, 145.5, 135.8, 135.5, 134.3, 132.6, 129.4, 128.1, 125.1, 125.0, 123.8, 121.9, 111.3, 108.0.

### 7-Methyl-10*H*-indolo[1,2-*a*]indol-10-one (**3ba**).<sup>3</sup>

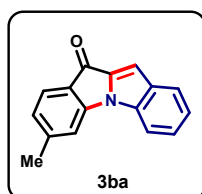

Yellow solid (60.0 mg, 85%); m.p. 175 – 177 °C; <sup>1</sup>H NMR (500 MHz, CDCl<sub>3</sub>) δ 7.63 (d, *J* = 8.0 Hz, 1H), 7.57 – 7.47 (m, 2H), 7.41 (d, *J* = 7.4 Hz, 1H), 7.20 – 7.01 (m, 3H), 6.86 (d, *J* = 7.6 Hz, 1H), 2.44 (s, 3H); <sup>13</sup>C NMR (125 MHz, CDCl<sub>3</sub>) δ 181.5, 147.2, 145.9, 136.3, 134.1, 132.6, 127.9, 127.0, 125.0, 124.9, 124.8, 121.8, 112.1, 111.3, 107.6, 22.5.

### 7-(*tert*-Butyl)-10*H*-Indolo[1,2-*a*]indol-10-one (**3ca**).

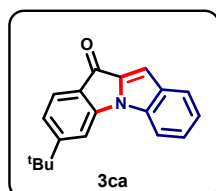

Yellow solid (69.0 mg, 84%); m.p. 147 – 149 °C; <sup>1</sup>H NMR (500 MHz, CDCl<sub>3</sub>) δ 7.62 (d, *J* = 8.0 Hz, 1H), 7.56 (d, *J* = 8.0 Hz, 1H), 7.52 (d, *J* = 8.2 Hz, 1H), 7.41 (t, *J* = 7.7 Hz, 1H), 7.36 (s, 1H), 7.20 – 7.01 (m, 3H), 1.40 (s, 9H); <sup>13</sup>C NMR (125 MHz, CDCl<sub>3</sub>) δ 181.5, 160.4, 146.0, 136.3, 134.2, 132.5, 127.8, 126.9, 124.9, 124.8, 121.8, 121.0, 111.3, 108.6, 107.5, 35.8, 31.0; HRMS (ESI) *m/z* calcd. for C<sub>19</sub>H<sub>17</sub>NONa [M+Na]<sup>+</sup>: 298.1208, found: 298.1203.

### 7-Phenyl-10*H*-indolo[1,2-*a*]indol-10-one (3da).

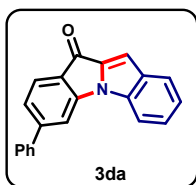

Yellow solid (54.0 mg, 61%); m.p. 149 – 151 °C; **<sup>1</sup>H NMR (500 MHz, CDCl<sub>3</sub>)** δ 7.72 (d, *J* = 7.9 Hz, 1H), 7.70 – 7.65 (m, 3H), 7.61 (d, *J* = 8.3 Hz, 1H), 7.56 (s, 1H), 7.52 (t, *J* = 7.4 Hz, 2H), 7.49 – 7.41 (m, 2H), 7.31 (dd, *J* = 8.1, 1.0 Hz, 1H), 7.19 – 7.12 (m, 2H); **<sup>13</sup>C NMR (125 MHz, CDCl<sub>3</sub>)** δ 181.3, 149.1, 146.2, 140.0, 136.4, 134.3, 132.7, 129.1, 128.8, 128.2, 128.1, 127.3, 125.5, 125.1, 122.9, 122.0, 111.4, 110.2, 108.0; **HRMS (ESI)** *m/z* calcd. for C<sub>21</sub>H<sub>13</sub>NONa [M+Na]<sup>+</sup> : 318.0895, found: 318.0889.

### 7-Methoxy-10*H*-indolo[1,2-*a*]indol-10-one (3ea).<sup>3</sup>

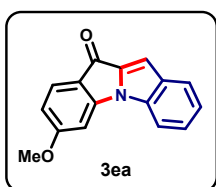

Yellow solid (72.0 mg, 72%); m.p. 186 – 188 °C; **<sup>1</sup>H NMR (500 MHz, CDCl<sub>3</sub>)** δ 7.62 (d, *J* = 8.0 Hz, 1H), 7.56 (d, *J* = 8.4 Hz, 1H), 7.43 (dd, *J* = 8.3, 0.8 Hz, 1H), 7.38 (ddd, *J* = 8.2, 7.1, 1.1 Hz, 1H), 7.11 (ddd, *J* = 8.0, 7.2, 0.9 Hz, 1H), 7.05 (d, *J* = 0.6 Hz, 1H), 6.81 (d, *J* = 2.1 Hz, 1H), 6.52 (dd, *J* = 8.4, 2.1 Hz, 1H), 3.91 (s, 3H); **<sup>13</sup>C NMR (75 MHz, CDCl<sub>3</sub>)** δ 180.5, 166.1, 147.4, 136.9, 134.0, 132.6, 127.7, 126.8, 124.8, 122.5, 121.9, 111.1, 107.9, 107.2, 98.6, 55.9.

### 7-(methylthio)-10*H*-Indolo[1,2-*a*]indol-10-one (3fa).

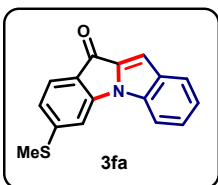

Yellow solid (59.0 mg, 74%); m.p. 187 – 189 °C; **<sup>1</sup>H NMR (500 MHz, CDCl<sub>3</sub>)** 7.66 (d, *J* = 8.0 Hz, 1H), 7.55 (d, *J* = 8.0 Hz, 1H), 7.50 (d, *J* = 8.2 Hz, 1H), 7.43 (t, *J* = 7.6 Hz, 1H), 7.18 (s, 1H), 7.15 (t, *J* = 7.6 Hz, 1H), 7.12 (s, 1H), 6.87 (d, *J* = 7.9 Hz, 1H), 2.60 (s, 3H); **<sup>13</sup>C NMR (125 MHz, CDCl<sub>3</sub>)** δ 180.6, 149.5, 145.7, 136.4, 134.0, 132.6, 127.9, 125.9, 125.1, 124.9, 122.0, 119.4, 111.2, 107.8, 107.7, 15.0; **HRMS (ESI)** *m/z* calcd. for C<sub>16</sub>H<sub>11</sub>NOSNa [M+Na]<sup>+</sup>: 288.0459, found: 288.0453.

### 7-Fluoro-10*H*-indolo[1,2-*a*]indol-10-one (3ga).<sup>3</sup>

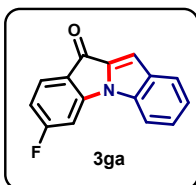

Yellow solid (41.0 mg, 58%); m.p. 203 – 205 °C; **<sup>1</sup>H NMR (500 MHz, CDCl<sub>3</sub>)** δ 7.69 – 7.59 (m, 2H), 7.51 – 7.39 (m, 2H), 7.19 – 7.13 (m, 1H), 7.13 (s, 1H), 7.04 (dd, *J* = 8.6, 2.1 Hz, 1H), 6.81 – 6.70 (m, 1H); **<sup>13</sup>C NMR (125 MHz, CDCl<sub>3</sub>)** δ 180.0, 167.6 (d, *J*<sub>C-F</sub> = 255.6 Hz), 147.0 (d, *J*<sub>C-F</sub> = 13.1 Hz), 136.3, 134.1, 132.6, 128.3, 127.1 (d, *J*<sub>C-F</sub> = 11.2 Hz), 125.6, 125.1, 122.4, 111.1, 110.6 (d, *J*<sub>C-F</sub> = 23.3 Hz), 108.5, 100.0 (d, *J*<sub>C-F</sub> = 28.0 Hz).

### 7-Bromo-10*H*-indolo[1,2-*a*]indol-10-one (3ha).

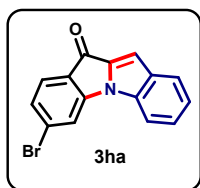

Yellow solid (58.0 mg, 65%); m.p. 204 – 206 °C; **<sup>1</sup>H NMR (500 MHz, CDCl<sub>3</sub>)** δ 7.66 (d, *J* = 8.0 Hz, 1H), 7.52 – 7.46 (m, 3H), 7.47 – 7.41 (m, 1H), 7.23 (dd, *J* = 8.1, 1.3 Hz, 1H), 7.19 – 7.13 (m, 2H); **<sup>13</sup>C NMR (125 MHz, CDCl<sub>3</sub>)** δ 180.3, 146.0, 135.8, 134.1, 132.7, 130.1, 128.5, 128.2, 126.9, 126.1, 125.2, 122.5, 114.8, 111.3, 108.9; **HRMS (ESI)** *m/z* calcd. for C<sub>15</sub>H<sub>8</sub>BrNONa [M+Na]<sup>+</sup>: 319.9687, found: 319.9681.

### 7-Chloro-10*H*-indolo[1,2-*a*]indol-10-one (3ia).<sup>3</sup>

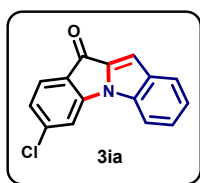

Yellow solid (48.0 mg, 63%); m.p. 217 – 219 °C; **<sup>1</sup>H NMR (500 MHz, CDCl<sub>3</sub>)** δ 7.68 (d, *J* = 8.0 Hz, 1H), 7.58 (d, *J* = 8.0 Hz, 1H), 7.52 (d, *J* = 8.2 Hz, 1H), 7.46 (t, *J* = 7.6 Hz, 1H), 7.37 (s, 1H), 7.23 – 7.14 (m, 2H), 7.08 (d, *J* = 7.7 Hz, 1H); **<sup>13</sup>C NMR (125 MHz, CDCl<sub>3</sub>)** δ 180.2, 146.1, 141.7, 135.9, 134.1, 132.7, 128.5, 127.8, 126.0, 125.2, 124.0, 122.5, 112.0, 111.3, 108.8.

### 7-Iodo-10*H*-indolo[1,2-*a*]indol-10-one (3ja).

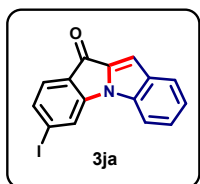

Yellow solid (65.0 mg, 63%); m.p. 199 – 201 °C; **<sup>1</sup>H NMR (400 MHz, CDCl<sub>3</sub>)** δ 7.62 (s, 1H), 7.57 (d, *J* = 7.7 Hz, 1H), 7.46 – 7.31 (m, 3H), 7.26 (d, *J* = 7.5 Hz, 1H), 7.15 – 6.99 (m, 2H); **<sup>13</sup>C NMR (125 MHz, CDCl<sub>3</sub>)** δ 180.6, 145.7, 135.5, 134.1, 133.1, 132.7, 128.8, 128.5, 126.0, 125.2, 122.4, 120.5, 111.4, 108.8, 102.6; **HRMS (ESI)** *m/z* calcd. for C<sub>15</sub>H<sub>8</sub>INONa [M+Na]<sup>+</sup>: 367.9548, found: 367.9542.

### 8-Methyl-10*H*-indolo[1,2-*a*]indol-10-one (3ka).<sup>3</sup>

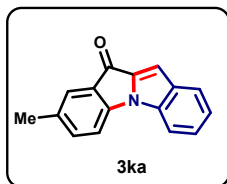

Brick red solid (58.0 mg, 83%); m.p. 129 – 131 °C; **<sup>1</sup>H NMR (500 MHz, CDCl<sub>3</sub>)** δ 7.63 (d, *J* = 8.1 Hz, 1H), 7.48 (d, *J* = 8.3 Hz, 1H), 7.44 (s, 1H), 7.40 (t, *J* = 7.9 Hz, 1H), 7.30 (d, *J* = 8.2 Hz, 1H), 7.23 (d, *J* = 8.0 Hz, 1H), 7.14 – 7.07 (m, 2H), 2.33 (s, 3H); **<sup>13</sup>C NMR (125 MHz, CDCl<sub>3</sub>)** δ 181.9, 143.5, 136.0, 135.9, 134.2, 133.7, 132.4, 129.5, 127.9, 125.6, 125.0, 121.7, 111.2, 111.0, 107.6, 20.9.

### 8-Chloro-10*H*-indolo[1,2-*a*]indol-10-one (3la).<sup>3</sup>

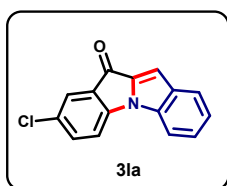

Yellow solid (81.0 mg, 81%); m.p. 203 – 205 °C; <sup>1</sup>H NMR (500 MHz, CDCl<sub>3</sub>) δ 7.66 (d, *J* = 8.0 Hz, 1H), 7.60 (d, *J* = 1.7 Hz, 1H), 7.55 – 7.40 (m, 3H), 7.29 (d, *J* = 8.3 Hz, 1H), 7.22 – 7.11 (m, 2H); <sup>13</sup>C NMR (125 MHz, CDCl<sub>3</sub>) δ 180.0, 143.7, 135.7, 134.9, 134.2, 132.5, 130.7, 129.5, 128.5, 125.3, 125.2, 122.3, 112.2, 111.2, 108.9.

### 9-Methyl-10*H*-indolo[1,2-*a*]indol-10-one (3ma).<sup>3</sup>

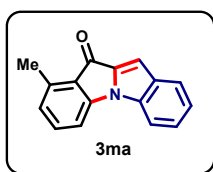

Yellow solid (66.0 mg, 70%); m.p. 158 – 160 °C; <sup>1</sup>H NMR (500 MHz, CDCl<sub>3</sub>) δ 7.65 (d, *J* = 8.1 Hz, 1H), 7.52 (d, *J* = 8.4 Hz, 1H), 7.44 – 7.39 (m, 1H), 7.37 (t, *J* = 7.8 Hz, 1H), 7.20 (d, *J* = 7.8 Hz, 1H), 7.13 (t, *J* = 7.5 Hz, 1H), 7.09 (s, 1H), 6.84 (d, *J* = 7.7 Hz, 1H), 2.63 (s, 3H); <sup>13</sup>C NMR (125 MHz, CDCl<sub>3</sub>) δ 182.9, 145.9, 140.8, 136.0, 134.8, 134.0, 132.6, 127.7, 126.5, 126.4, 124.9, 121.8, 111.4, 108.8, 107.0, 17.7.

### 9-Methoxy-10*H*-indolo[1,2-*a*]indol-10-one (3na).

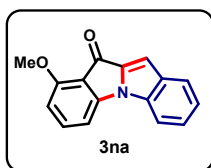

Yellow solid (64.0 mg, 84%); m.p. 163 – 165 °C; <sup>1</sup>H NMR (500 MHz, CDCl<sub>3</sub>) δ 7.64 (d, *J* = 8.0 Hz, 1H), 7.49 (d, *J* = 8.2 Hz, 1H), 7.46 (t, *J* = 8.1 Hz, 1H), 7.39 (t, *J* = 7.6 Hz, 1H), 7.13 (t, *J* = 7.5 Hz, 1H), 7.09 (s, 1H), 6.96 (d, *J* = 7.7 Hz, 1H), 6.60 (d, *J* = 8.5 Hz, 1H), 3.98 (s, 3H); <sup>13</sup>C NMR (125 MHz, CDCl<sub>3</sub>) δ 179.9, 158.7, 146.8, 137.5, 135.9, 134.1, 132.6, 127.6, 124.8, 121.8, 116.0, 111.3, 107.3, 107.1, 104.0, 56.0; HRMS (ESI) *m/z* calcd. for C<sub>16</sub>H<sub>11</sub>NO<sub>2</sub>Na [M+Na]<sup>+</sup>: 272.0687, found 272.0681.

### 9-Chloro-10*H*-indolo[1,2-*a*]indol-10-one (3oa).<sup>3</sup>

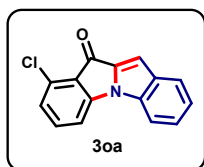

Yellow solid (55.0 mg, 72%); m.p. 208 – 210 °C; <sup>1</sup>H NMR (500 MHz, CDCl<sub>3</sub>) δ 7.68 (d, *J* = 7.9 Hz, 1H), 7.53 (d, *J* = 8.2 Hz, 1H), 7.49 – 7.40 (m, 2H), 7.30 (d, *J* = 7.8 Hz, 1H), 7.22 – 7.15 (m, 2H), 7.03 (d, *J* = 8.0 Hz, 1H); <sup>13</sup>C NMR (125 MHz, CDCl<sub>3</sub>) δ 178.7, 146.7, 135.9, 135.6, 134.1, 133.2, 132.7, 128.3, 125.6, 125.2, 122.4, 111.4, 109.7, 108.5.

### 12*H*-Benzo[*f*]indolo[1,2-*a*]indol-12-one (3pa).

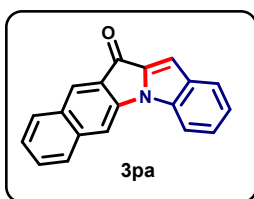

Brick red solid (46.0 mg, 56%); m.p. 218 – 220 °C; **<sup>1</sup>H NMR (500 MHz, CDCl<sub>3</sub>)** δ 8.19 (s, 1H), 7.88 (d, *J* = 8.0 Hz, 1H), 7.82 (d, *J* = 8.1 Hz, 1H), 7.79 – 7.69 (m, 2H), 7.63 (s, 1H), 7.57 (t, *J* = 7.4 Hz, 1H), 7.50 (t, *J* = 7.5 Hz, 1H), 7.42 (t, *J* = 7.4 Hz, 1H), 7.24 – 7.15 (m, 2H); **<sup>13</sup>C NMR (125 MHz, CDCl<sub>3</sub>)** δ 181.2, 139.7, 137.2, 136.8, 133.9, 132.9, 130.9, 130.3, 129.8, 129.6, 127.9, 126.6, 125.7, 124.9, 122.3, 111.9, 107.4, 106.5; **HRMS (ESI)** *m/z* calcd. for C<sub>19</sub>H<sub>12</sub>NO [M+H]<sup>+</sup>: 270.0919, found: 270.0912.

### 13*H*-Benzo[*e*]indolo[1,2-*a*]indol-13-one (3qa).<sup>3</sup>

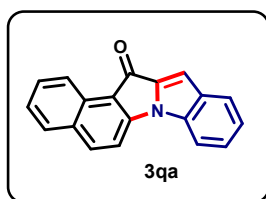

Brick red solid (41.0 mg, 50%); m.p. 197 – 199 °C; **<sup>1</sup>H NMR (500 MHz, CDCl<sub>3</sub>)** δ 8.19 (s, 1H), 7.88 (d, *J* = 8.0 Hz, 1H), 7.82 (d, *J* = 8.1 Hz, 1H), 7.75 (d, *J* = 8.3 Hz, 1H), 7.72 (d, *J* = 8.1 Hz, 1H), 7.63 (s, 1H), 7.57 (t, *J* = 7.4 Hz, 1H), 7.50 (t, *J* = 7.5 Hz, 1H), 7.42 (t, *J* = 7.4 Hz, 1H), 7.24 – 7.16 (m, 2H); **<sup>13</sup>C NMR (125 MHz, CDCl<sub>3</sub>)** δ 182.6, 147.1, 137.3, 136.8, 134.8, 132.9, 130.6, 130.0, 128.6, 128.2, 125.3, 125.1, 123.4, 121.9, 120.3, 111.4, 111.1, 108.8.

### 2-Chloro-10*H*-indolo[1,2-*a*]indol-10-one (3ab).<sup>4</sup>

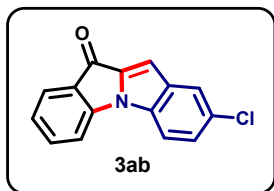

Yellow solid (58.0 mg, 76%); m.p. 199 – 201 °C; **<sup>1</sup>H NMR (500 MHz, CDCl<sub>3</sub>)** δ 7.67 (d, *J* = 7.4 Hz, 1H), 7.64 (s, 1H), 7.55 (t, *J* = 7.6 Hz, 1H), 7.46 (d, *J* = 8.7 Hz, 1H), 7.38 (d, *J* = 8.9 Hz, 1H), 7.35 (d, *J* = 7.9 Hz, 1H), 7.13 (t, *J* = 7.5 Hz, 1H), 7.07 (s, 1H); **<sup>13</sup>C NMR (125 MHz, CDCl<sub>3</sub>)** δ 181.3, 145.2, 136.6, 135.7, 133.4, 132.4, 129.1, 128.3, 127.5, 125.3, 124.3, 124.2, 112.1, 111.3, 106.9.

### 2-Chloro-7-methyl-10*H*-indolo[1,2-*a*]indol-10-one (3bb).

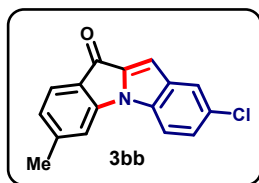

Yellow solid (61.0 mg, 75%); m.p. 188 – 190 °C; **<sup>1</sup>H NMR (500 MHz, CDCl<sub>3</sub>)** δ 7.62 (s, 1H), 7.54 (d, *J* = 7.6 Hz, 1H), 7.46 (d, *J* = 8.7 Hz, 1H), 7.36 (d, *J* = 8.4 Hz, 1H), 7.14 (s, 1H), 7.03 (s, 1H), 6.92 (d, *J* = 7.5 Hz, 1H), 2.47 (s, 3H); **<sup>13</sup>C NMR (125 MHz, CDCl<sub>3</sub>)** δ 181.1, 147.4, 145.6, 137.1, 133.4, 132.3, 128.1, 127.3, 126.7, 125.1, 124.9, 124.1, 112.10, 112.05, 106.5, 22.5; **HRMS (ESI)** *m/z* calcd. for C<sub>16</sub>H<sub>10</sub>ClN<sub>2</sub>O [M+Na]<sup>+</sup>: 290.0349, found: 290.0343.

### 2-Chloro-7-(methylthio)-10*H*-indolo[1,2-*a*]indol-10-one (3fb).

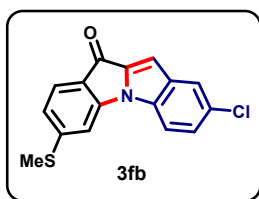

Yellow solid (64.0 mg, 71%); m.p. 159 – 161 °C; **<sup>1</sup>H NMR (500 MHz, CDCl<sub>3</sub>)** δ 7.65 (s, 1H), 7.57 (d, *J* = 7.9 Hz, 1H), 7.45 (d, *J* = 8.7 Hz, 1H), 7.38 (d, *J* = 8.4 Hz, 1H), 7.16 (s, 1H), 7.05 (s, 1H), 6.90 (d, *J* = 7.9 Hz, 1H), 2.61 (s, 3H); **<sup>13</sup>C NMR (125 MHz, CDCl<sub>3</sub>)** δ 180.4, 149.9, 145.5, 137.4, 133.6, 132.2, 128.2, 127.6, 125.7, 125.3, 124.2, 119.7, 112.1, 107.8, 106.7, 15.1; **HRMS (ESI)** *m/z* calcd. for C<sub>16</sub>H<sub>11</sub>ClNOS [M+H]<sup>+</sup>: 322.0069, found: 322.0063.

### 2,7-Dichloro-10*H*-indolo[1,2-*a*]indol-10-one (3ib).

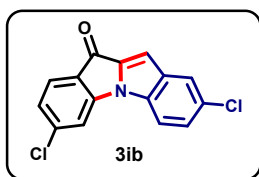

Yellow solid (61.0 mg, 70%); m.p. 229 – 231 °C; **<sup>1</sup>H NMR (500 MHz, CDCl<sub>3</sub>)** δ 7.66 (s, 1H), 7.59 (d, *J* = 8.0 Hz, 1H), 7.45 (d, *J* = 8.6 Hz, 1H), 7.41 (d, *J* = 8.4 Hz, 1H), 7.34 (s, 1H), 7.18 – 7.04 (m, 2H); **<sup>13</sup>C NMR (125 MHz, CDCl<sub>3</sub>)** δ 179.9, 145.8, 141.9, 136.8, 133.6, 132.3, 128.7, 128.0, 127.5, 126.2, 124.40, 124.38, 112.1, 112.0, 107.7; **HRMS (ESI)** *m/z* calcd. for C<sub>15</sub>H<sub>7</sub>Cl<sub>2</sub>NONa [M+Na]<sup>+</sup>: 309.9802, found: 309.9797.

### 2-Bromo-10*H*-indolo[1,2-*a*]indol-10-one (3ac).<sup>5</sup>

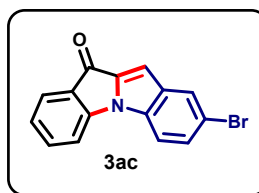

Yellow solid (59.0 mg, 65%); m.p. 197 – 199 °C; **<sup>1</sup>H NMR (500 MHz, CDCl<sub>3</sub>)** δ 7.81 (d, *J* = 0.9 Hz, 1H), 7.67 (d, *J* = 7.4 Hz, 1H), 7.55 (t, *J* = 7.7 Hz, 1H), 7.51 (dd, *J* = 8.8, 1.2 Hz, 1H), 7.42 (d, *J* = 8.7 Hz, 1H), 7.35 (d, *J* = 7.8 Hz, 1H), 7.13 (t, *J* = 7.5 Hz, 1H), 7.07 (s, 1H); **<sup>13</sup>C NMR (125 MHz, CDCl<sub>3</sub>)** δ 181.3, 145.1, 136.4, 135.7, 134.0, 132.6, 130.8, 129.1, 127.3, 125.3, 124.3, 114.9, 112.5, 111.3, 106.7.

### 2-Bromo-7-methyl-10*H*-indolo[1,2-*a*]indol-10-one (3bc).

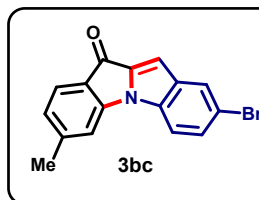

Yellow solid (64.0 mg, 68%); m.p. 208 – 210 °C; **<sup>1</sup>H NMR (500 MHz, CDCl<sub>3</sub>)** δ 7.79 (s, 1H), 7.54 (d, *J* = 7.6 Hz, 1H), 7.49 (d, *J* = 8.5 Hz, 1H), 7.41 (d, *J* = 8.7 Hz, 1H), 7.14 (s, 1H), 7.03 (s, 1H), 6.92 (d, *J* = 7.6 Hz, 1H), 2.47 (s, 3H); **<sup>13</sup>C NMR (125 MHz, CDCl<sub>3</sub>)** δ 181.1, 147.4, 145.5, 136.9, 133.9, 132.5, 130.6, 127.2, 126.7, 125.1, 124.9, 114.7, 112.5, 112.1, 106.3, 22.5; **HRMS (ESI)** *m/z* calcd. for C<sub>16</sub>H<sub>10</sub>BrNONa [M+Na]<sup>+</sup>: 333.9843, found: 333.9837.

### 2-Fluoro-10*H*-indolo[1,2-*a*]indol-10-one (3ad).<sup>4</sup>

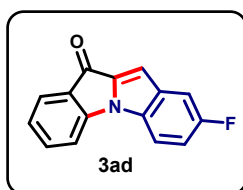

Yellow solid (51.0 mg, 71%); m.p. 244 – 246 °C; <sup>1</sup>H NMR (500 MHz, CDCl<sub>3</sub>) δ 7.66 (d, *J* = 7.4 Hz, 1H), 7.53 (t, *J* = 7.7 Hz, 1H), 7.47 (dd, *J* = 8.9, 4.1 Hz, 1H), 7.37 – 7.28 (m, 2H), 7.19 (td, *J* = 9.0, 2.3 Hz, 1H), 7.14 – 7.04 (m, 2H); <sup>13</sup>C NMR (125 MHz, CDCl<sub>3</sub>) δ 181.5, 158.4 (d, *J*<sub>C-F</sub> = 239.8 Hz), 145.4, 137.0, 135.7, 133.0 (d, *J*<sub>C-F</sub> = 10.0 Hz), 130.9, 129.1, 125.4, 124.1, 116.8 (d, *J*<sub>C-F</sub> = 26.5 Hz), 112.1 (d, *J*<sub>C-F</sub> = 9.5 Hz), 111.0, 109.8 (d, *J*<sub>C-F</sub> = 23.6 Hz), 107.4 (d, *J*<sub>C-F</sub> = 4.9 Hz).

### 3-Fluoro-10*H*-indolo[1,2-*a*]indol-10-one (3ae).<sup>4</sup>

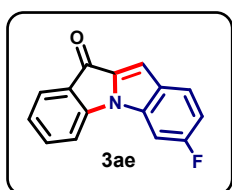

Yellow solid (55.0 mg, 78%); m.p. 242 – 244 °C; <sup>1</sup>H NMR (500 MHz, CDCl<sub>3</sub>) δ 7.67 (d, *J* = 7.0 Hz, 1H), 7.63 – 7.57 (m, 1H), 7.54 (t, *J* = 7.2 Hz, 1H), 7.31 (d, *J* = 7.5 Hz, 1H), 7.20 (d, *J* = 8.4 Hz, 1H), 7.16 – 7.06 (m, 2H), 6.90 (t, *J* = 8.3 Hz, 1H); <sup>13</sup>C NMR (125 MHz, CDCl<sub>3</sub>) δ 181.0, 163.4 (d, *J*<sub>C-F</sub> = 246.9 Hz), 145.1, 136.6 (d, *J*<sub>C-F</sub> = 3.3 Hz), 135.5, 134.3 (d, *J*<sub>C-F</sub> = 12.4 Hz), 129.5, 129.2, 126.2 (d, *J* = 10.7 Hz), 125.3, 124.3, 111.3, 111.1 (d, *J*<sub>C-F</sub> = 25.1 Hz), 107.9, 98.1 (d, *J* = 27.2 Hz).

### 3-Chloro-10*H*-indolo[1,2-*a*]indol-10-one (3af).<sup>5</sup>

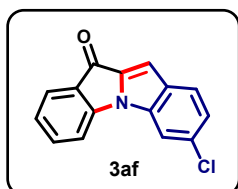

Yellow solid (56.0 mg, 73%); m.p. 197 – 199 °C; <sup>1</sup>H NMR (500 MHz, CDCl<sub>3</sub>) δ 7.66 (d, *J* = 7.4 Hz, 1H), 7.58 – 7.52 (m, 2H), 7.49 (s, 1H), 7.33 (d, *J* = 7.8 Hz, 1H), 7.17 – 7.05 (m, 3H); <sup>13</sup>C NMR (125 MHz, CDCl<sub>3</sub>) δ 181.2, 145.0, 136.2, 135.6, 134.2, 134.1, 131.0, 129.2, 125.7, 125.3, 124.3, 122.8, 111.4, 111.3, 107.7.

### 3-Bromo-10*H*-indolo[1,2-*a*]indol-10-one (3ag).<sup>5</sup>

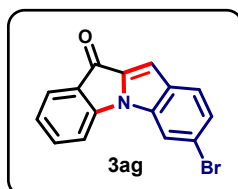

Yellow solid (64.0 mg, 71%); m.p. 195 – 197 °C; <sup>1</sup>H NMR (500 MHz, CDCl<sub>3</sub>) δ 7.70 (s, 1H), 7.68 (d, *J* = 7.5 Hz, 1H), 7.58 – 7.54 (m, 1H), 7.52 (d, *J* = 8.5 Hz, 1H), 7.37 (d, *J* = 7.9 Hz, 1H), 7.27 – 7.24 (m, 1H), 7.14 (t, *J* = 7.5 Hz, 1H), 7.10 (s, 1H); <sup>13</sup>C NMR (125 MHz, CDCl<sub>3</sub>) δ 181.2, 144.9, 136.0, 135.6, 134.4, 131.3, 129.2, 125.9, 125.4, 125.3, 124.4, 122.1, 114.3, 111.4, 107.7.

**Methyl 10-oxo-10H-indolo[1,2-*a*]indole-3-carboxylate (3ah).<sup>6</sup>**

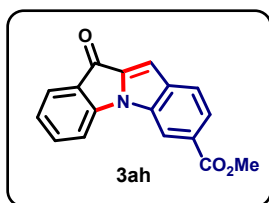

Yellow solid (29.0 mg, 35%); m.p. 210 – 212 °C; **<sup>1</sup>H NMR (500 MHz, CDCl<sub>3</sub>)** δ 8.27 (s, 1H), 7.83 (d, *J* = 8.3 Hz, 1H), 7.72 (d, *J* = 8.4 Hz, 1H), 7.70 (d, *J* = 7.5 Hz, 1H), 7.60 (t, *J* = 7.6 Hz, 1H), 7.54 (d, *J* = 7.9 Hz, 1H), 7.18 – 7.13 (m, 2H), 4.00 (s, 3H). 8.27 (s, 1H), 7.83 (d, *J* = 8.3 Hz, 1H), 7.71 (m, 2H), 7.60 (t, *J* = 7.6 Hz, 1H), 7.54 (d, *J* = 7.9 Hz, 1H), 7.20 – 7.11 (m, 2H), 4.00 (s, 3H); **<sup>13</sup>C NMR (125 MHz, CDCl<sub>3</sub>)** δ 181.6, 167.0, 145.3, 137.9, 135.95, 135.82, 133.5, 129.3, 129.0, 125.4, 124.7, 124.4, 122.6, 113.1, 111.8, 107.1, 52.5.

**10H-[1,3]Dioxolo[4,5-*f*]indolo[1,2-*a*]indol-10-one (3ai).**

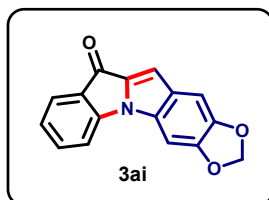

Brick red solid (18.0 mg, 23%); m.p. 168 – 170 °C; **<sup>1</sup>H NMR (500 MHz, CDCl<sub>3</sub>)** δ 7.62 (d, *J* = 7.2 Hz, 1H), 7.48 (t, *J* = 7.5 Hz, 1H), 7.23 (d, *J* = 7.9 Hz, 1H), 7.08 (t, *J* = 7.3 Hz, 1H), 7.03 – 6.90 (m, 3H), 6.02 (s, 2H); **<sup>13</sup>C NMR (125 MHz, CDCl<sub>3</sub>)** δ 180.5, 150.0, 144.9, 144.5, 134.98, 134.87, 130.6, 129.8, 126.8, 124.9, 123.9, 110.7, 108.6, 102.3, 101.6, 91.9; **HRMS (ESI)** *m/z* calcd. for C<sub>16</sub>H<sub>10</sub>NO<sub>3</sub> [M+H]<sup>+</sup>: 264.0661, found: 264.0653.

**7-Methyl-10H-[1,3]dioxolo[4,5-*f*]indolo[1,2-*a*]indol-10-one (3bi).**

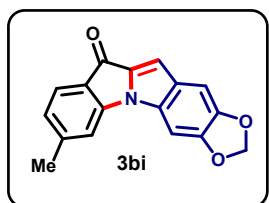

Brick red solid (22.0 mg, 26%); m.p. 194 – 197 °C; **<sup>1</sup>H NMR (500 MHz, CDCl<sub>3</sub>)** δ 7.50 (d, *J* = 7.0 Hz, 1H), 7.04 (s, 1H), 7.03 – 6.91 (m, 3H), 6.87 (d, *J* = 6.9 Hz, 1H), 6.01 (s, 2H), 2.44 (s, 3H); **<sup>13</sup>C NMR (125 MHz, CDCl<sub>3</sub>)** δ 180.5, 149.8, 146.5, 145.4, 144.4, 135.5, 130.5, 127.5, 126.8, 124.8, 124.6, 111.6, 108.2, 102.3, 101.6, 92.0, 22.5; **HRMS (ESI)** *m/z* calcd. for C<sub>17</sub>H<sub>11</sub>NO<sub>3</sub>Na [M+Na]<sup>+</sup>: 300.0637, found: 300.0631.

## 7. References

- (1) Vaitla, J.; Bayer, A.; Hopmann, K. H. *Angew. Chem., Int. Ed.* **2017**, 56, 4277.
- (2) Chauhan, J.; Fletcher, S. *Tetrahedron Lett.* **2012**, 53, 4951.
- (3) Wu, X.; Xiao, Y.; Sun, S.; Yu, J.-T.; Cheng, J. *Org. Lett.* **2019**, 21, 6653.
- (4) Liu, M.; Liu, Y.-W.; Xu, H.; Dai, H.-X. *Tetrahedron Lett.* **2019**, 60, 151061.
- (5) Zou, S.; Liu, Y.; Xi, C. *ACS Omega* **2019**, 4, 18734.

## 8. X-ray Structures

(a) X-ray Structure of **3ha** with 50% ellipsoid probability

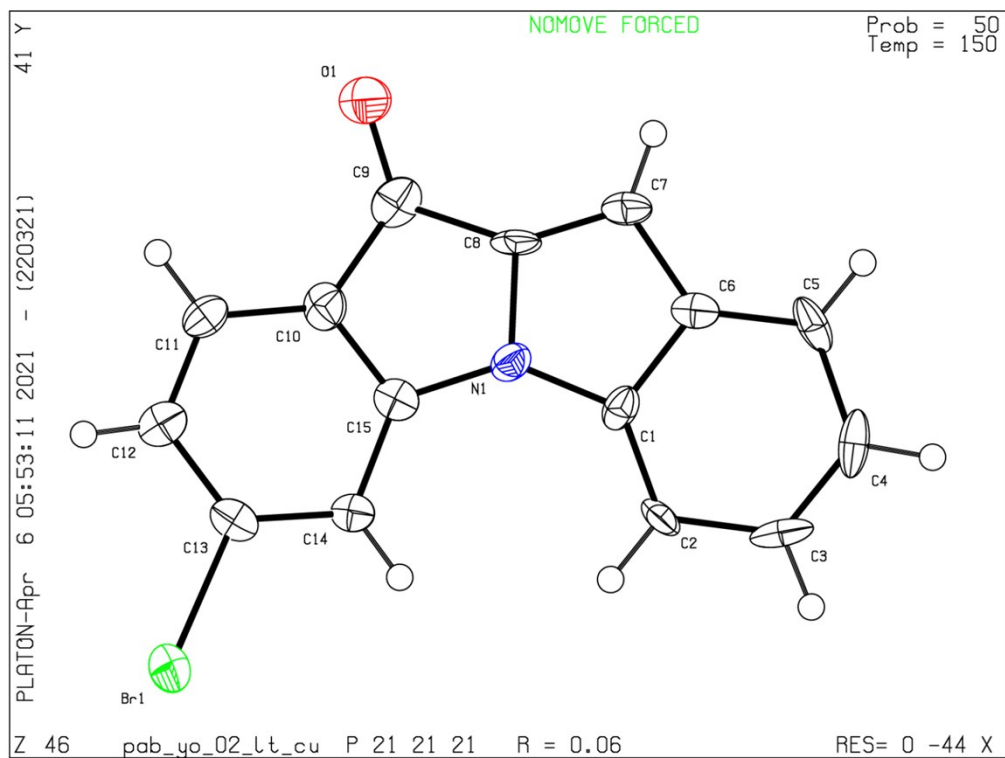

(b) X-ray Structure of **3pa** with 50% ellipsoid probability

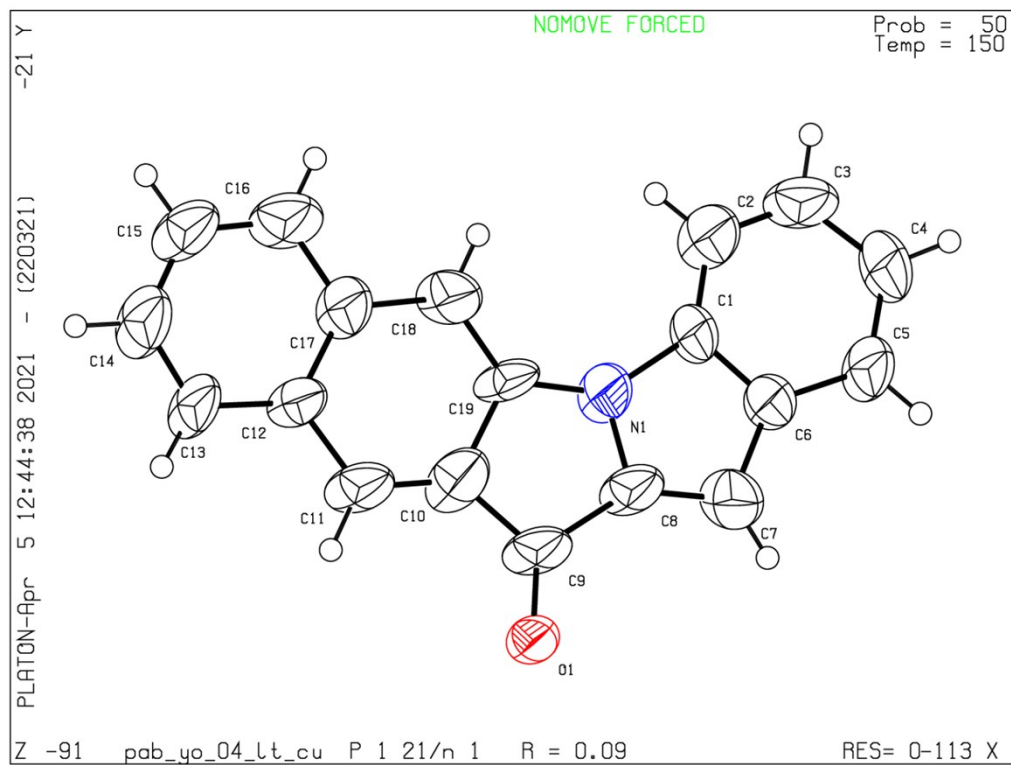

(c) X-ray Structure of **3bb** with 50% ellipsoid probability

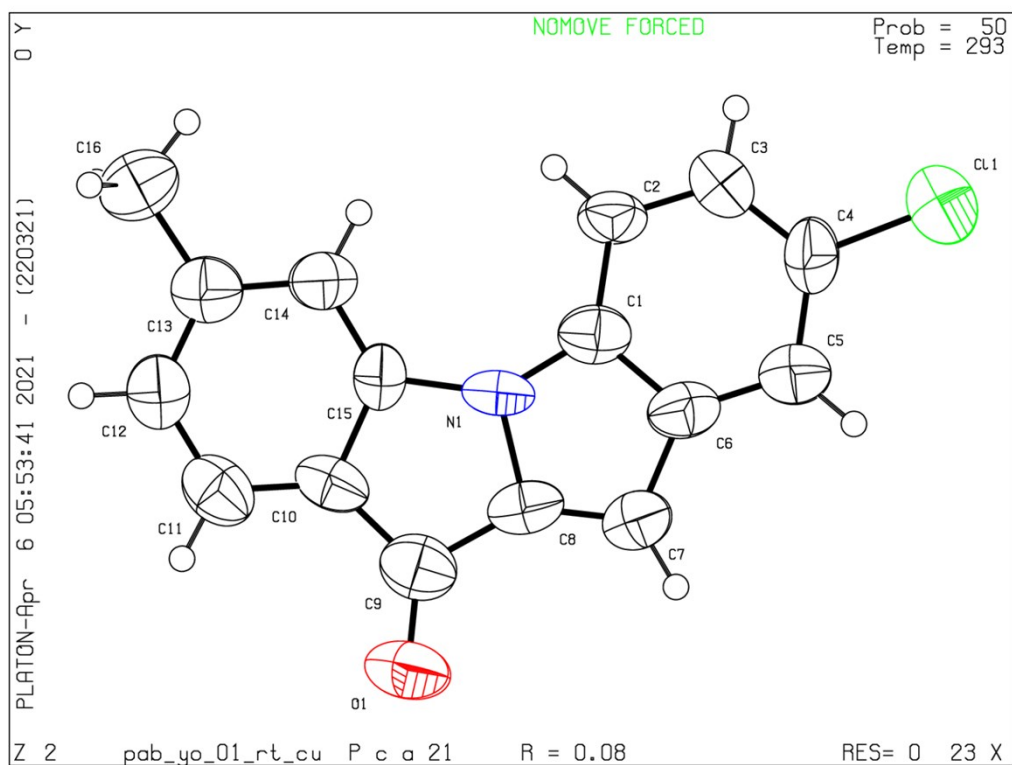

(c) X-ray Structure of **3fb** with 50% ellipsoid probability

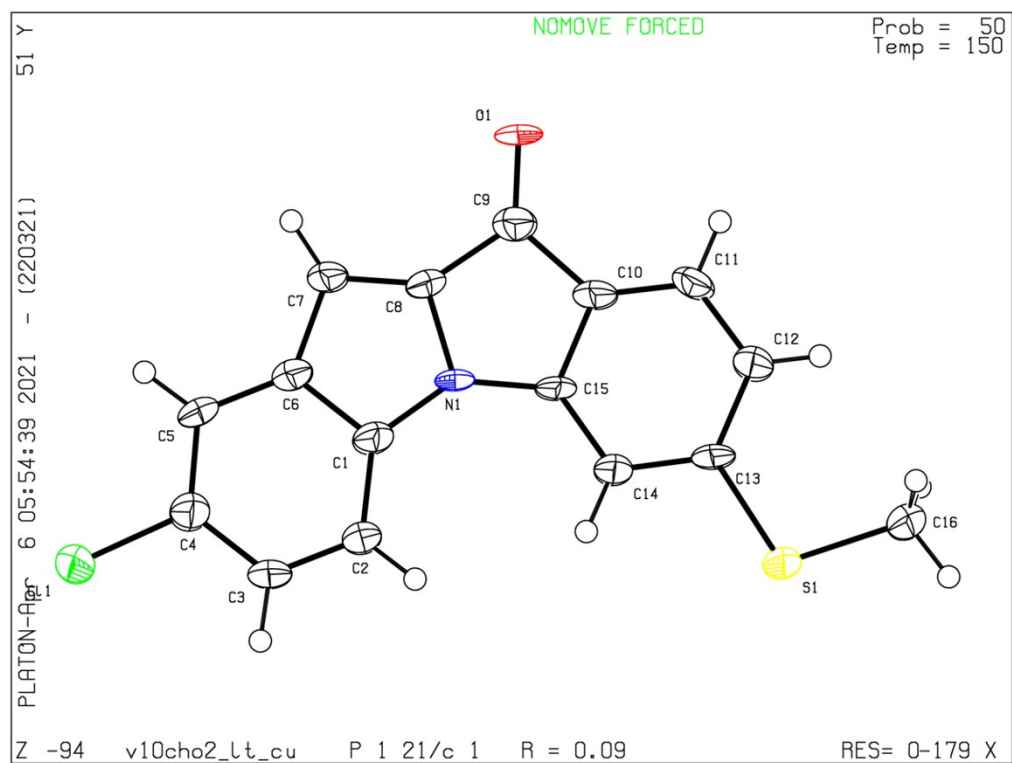

# *Appendix I*

## **Spectral Copies of $^1\text{H}$ and $^{13}\text{C}$ NMR of Compounds Obtained in this Study**

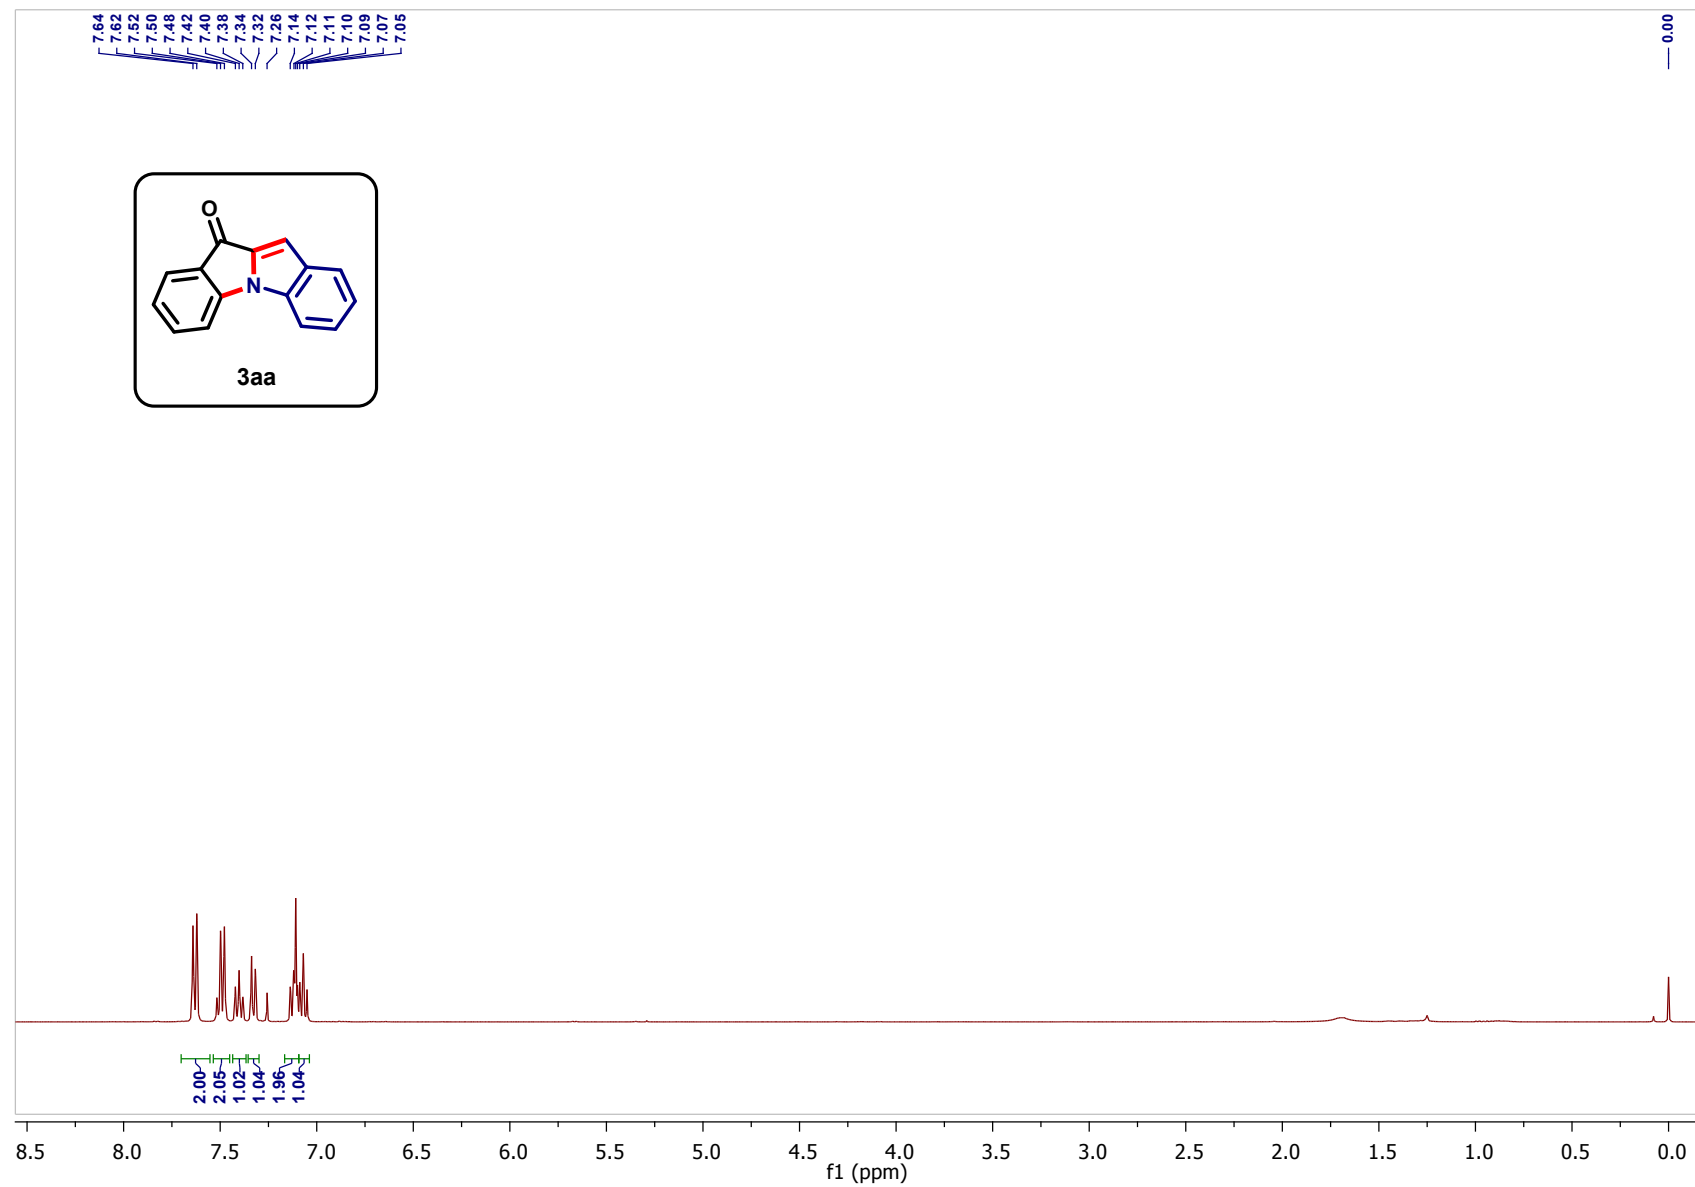

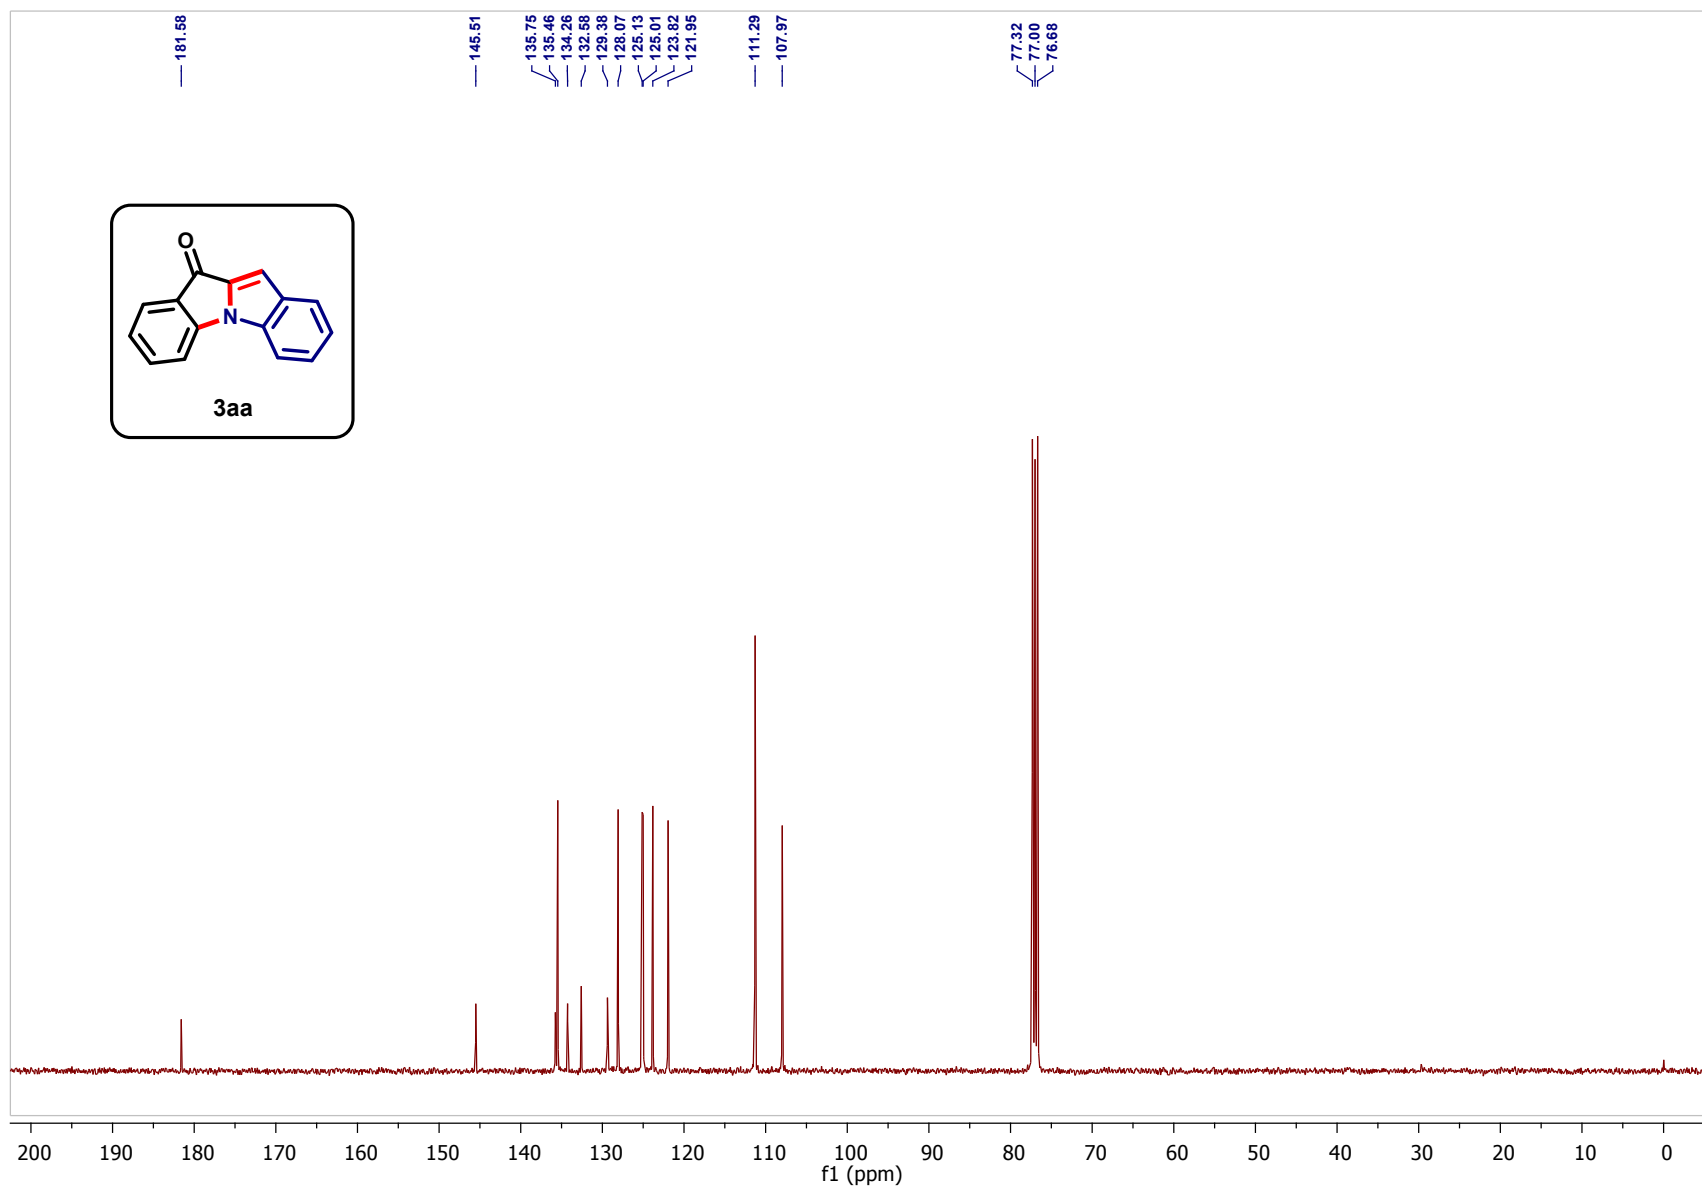

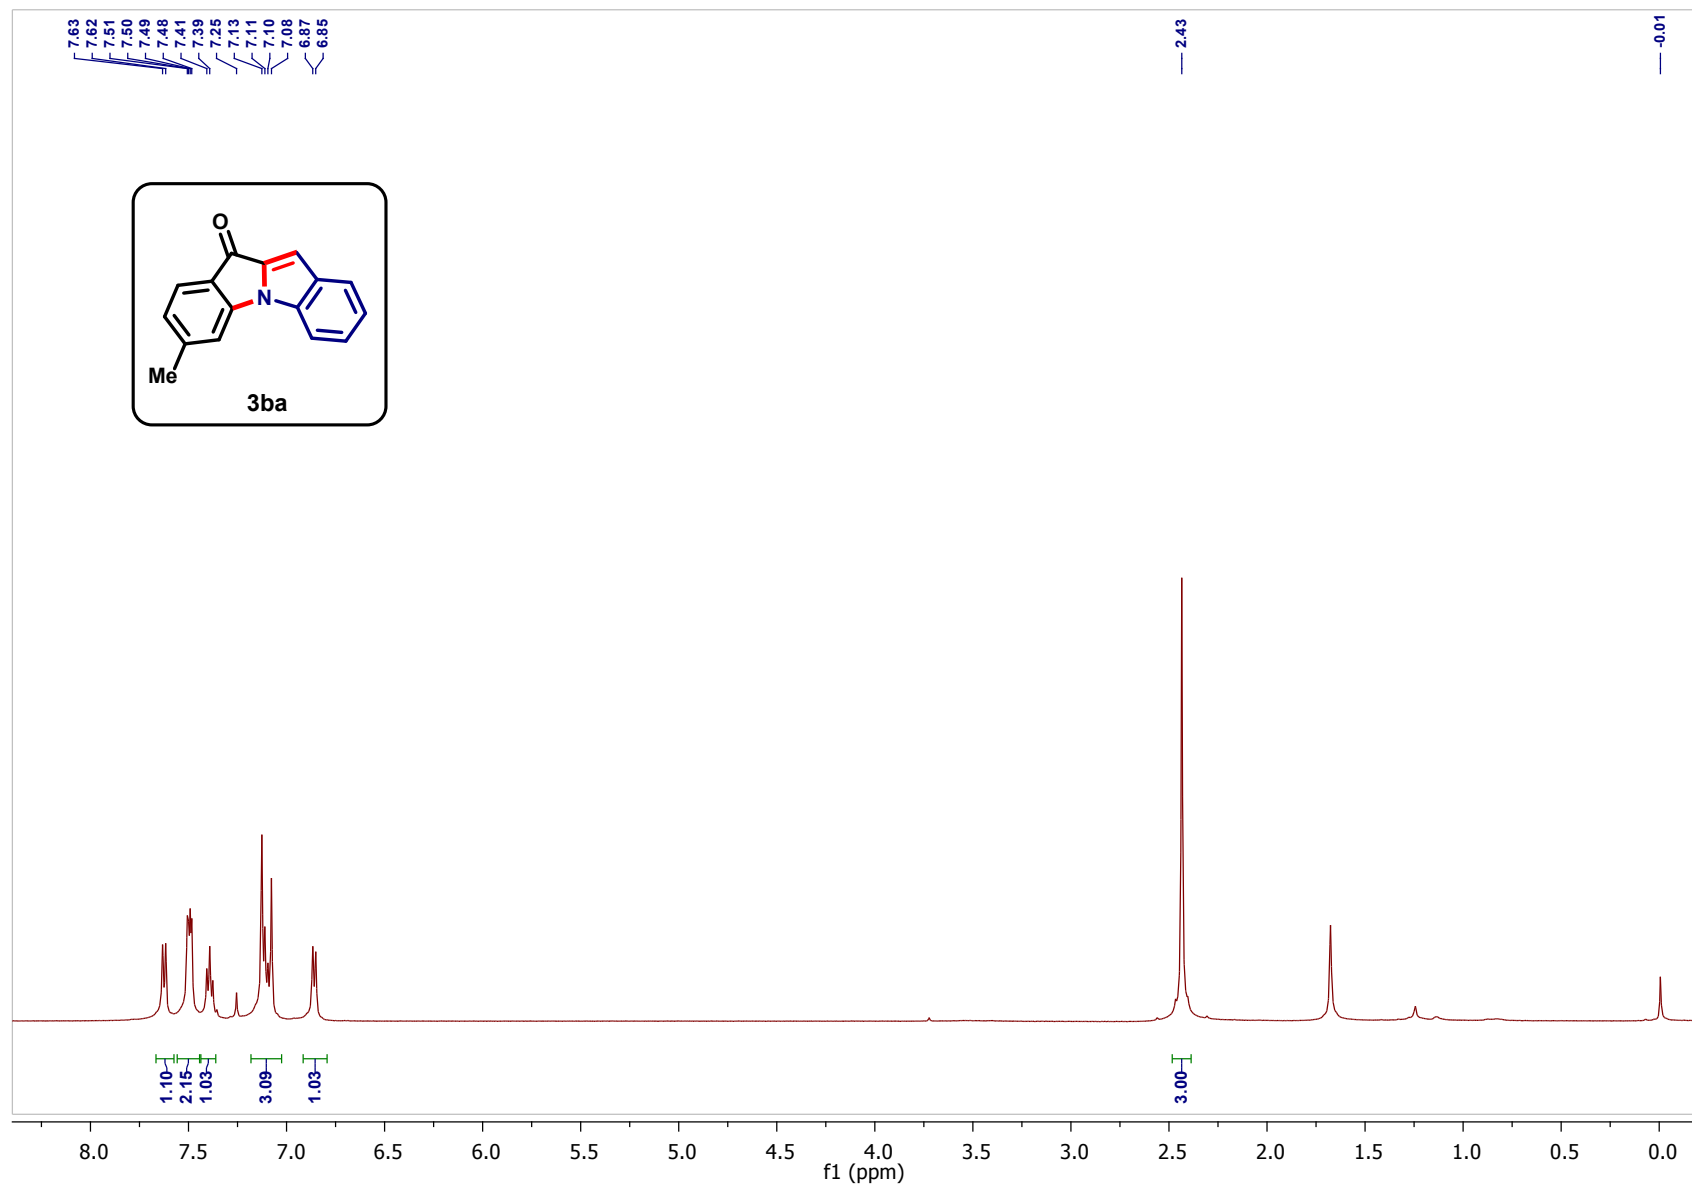

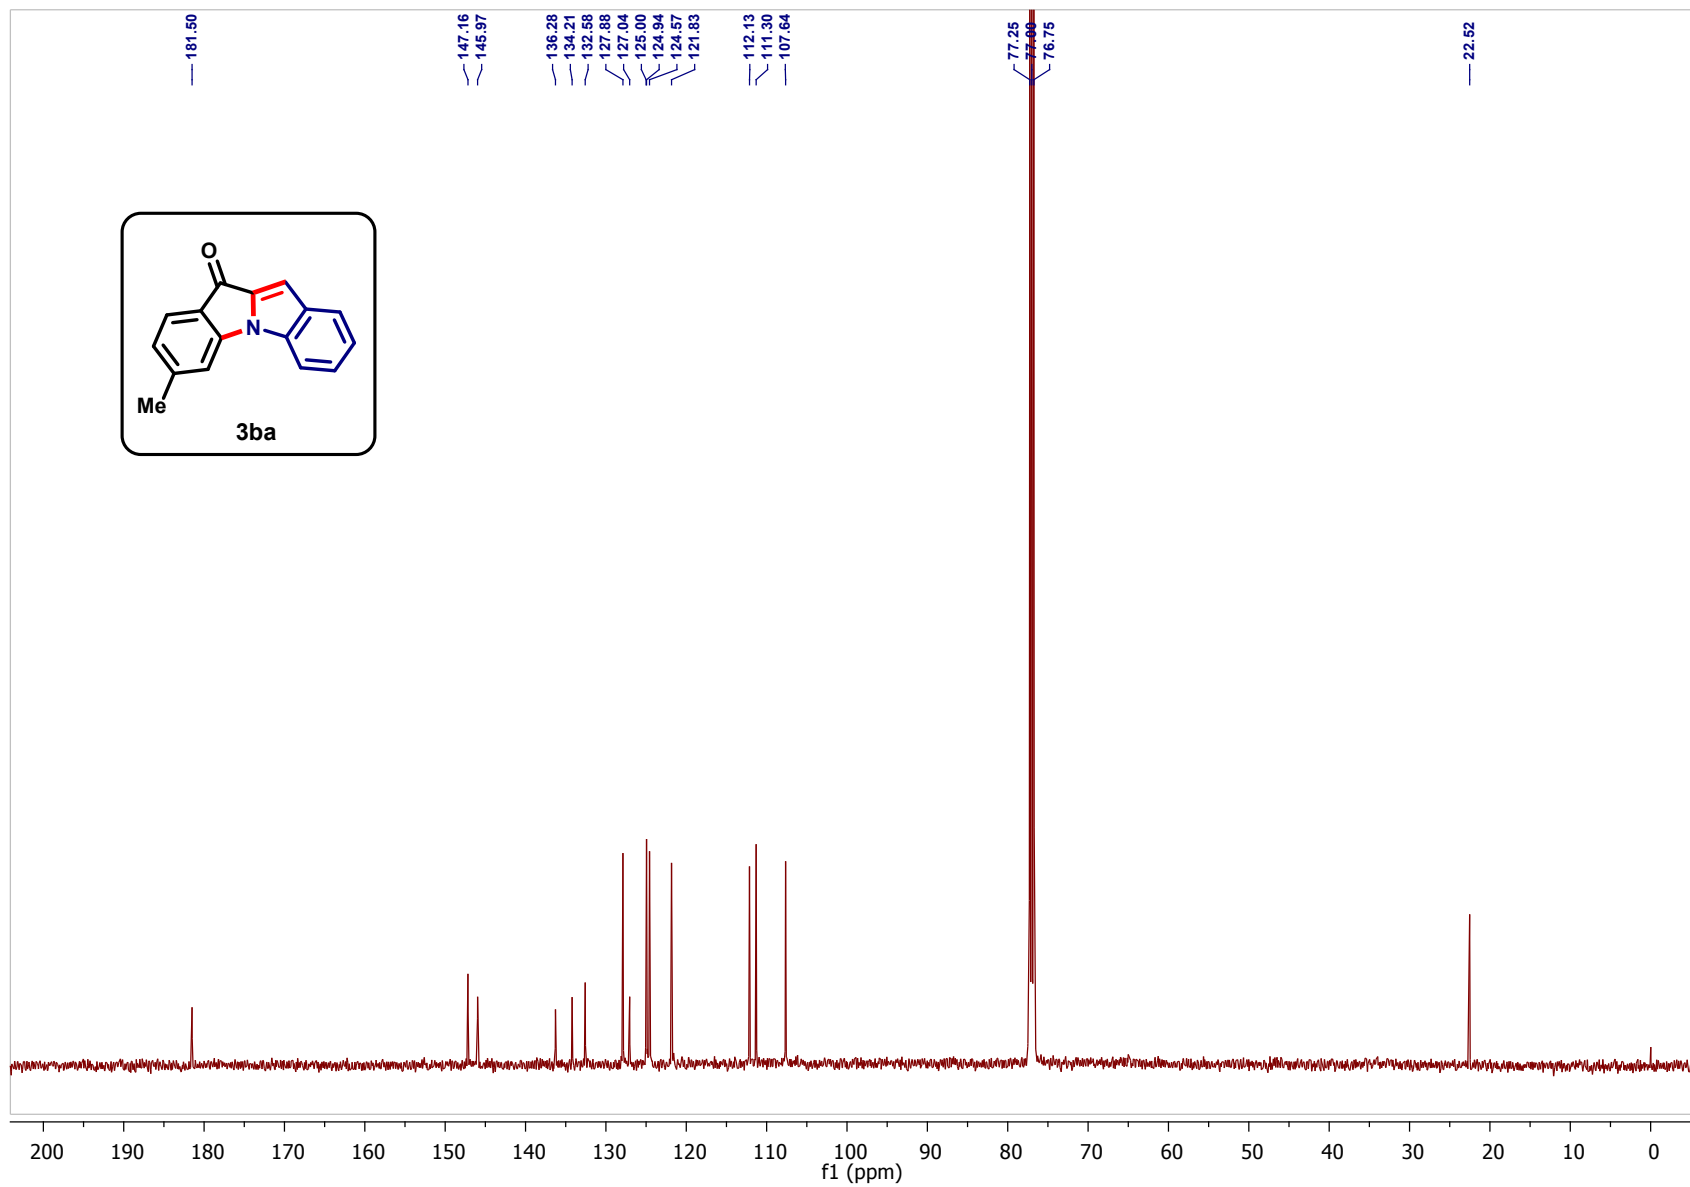

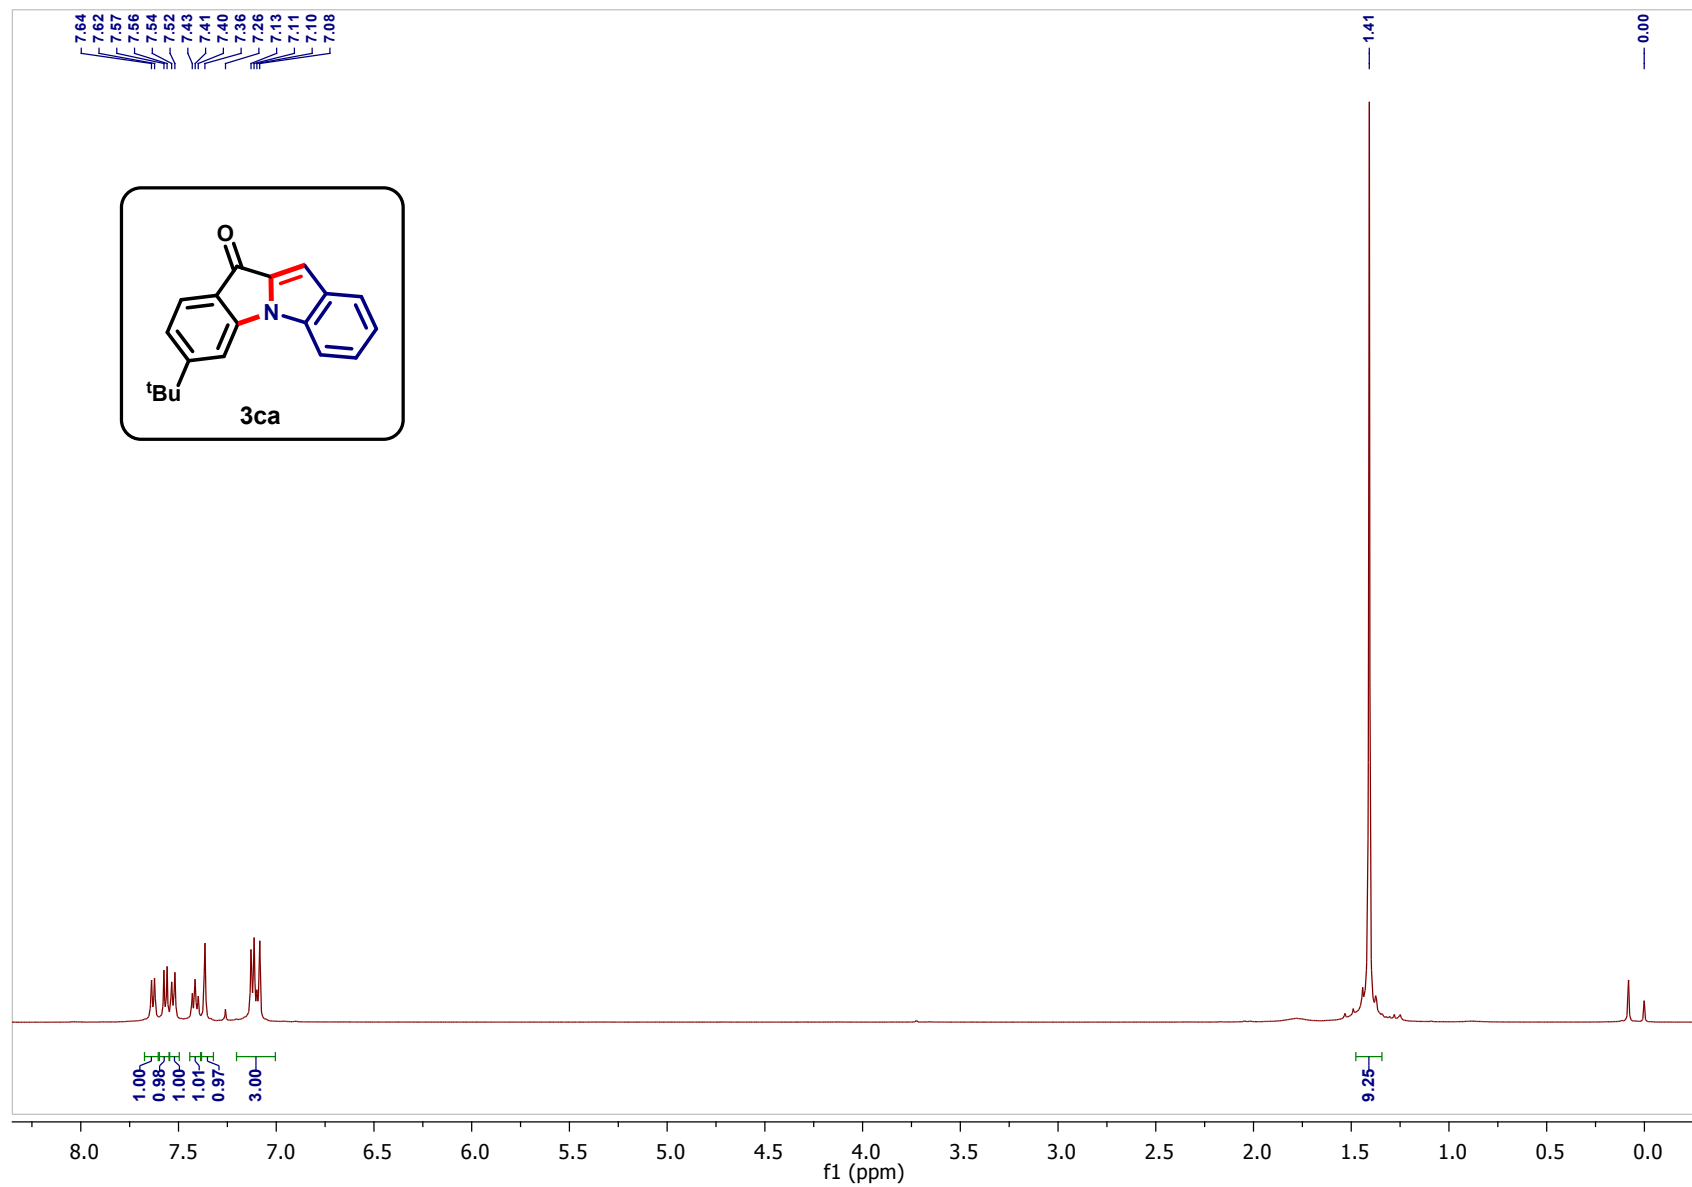

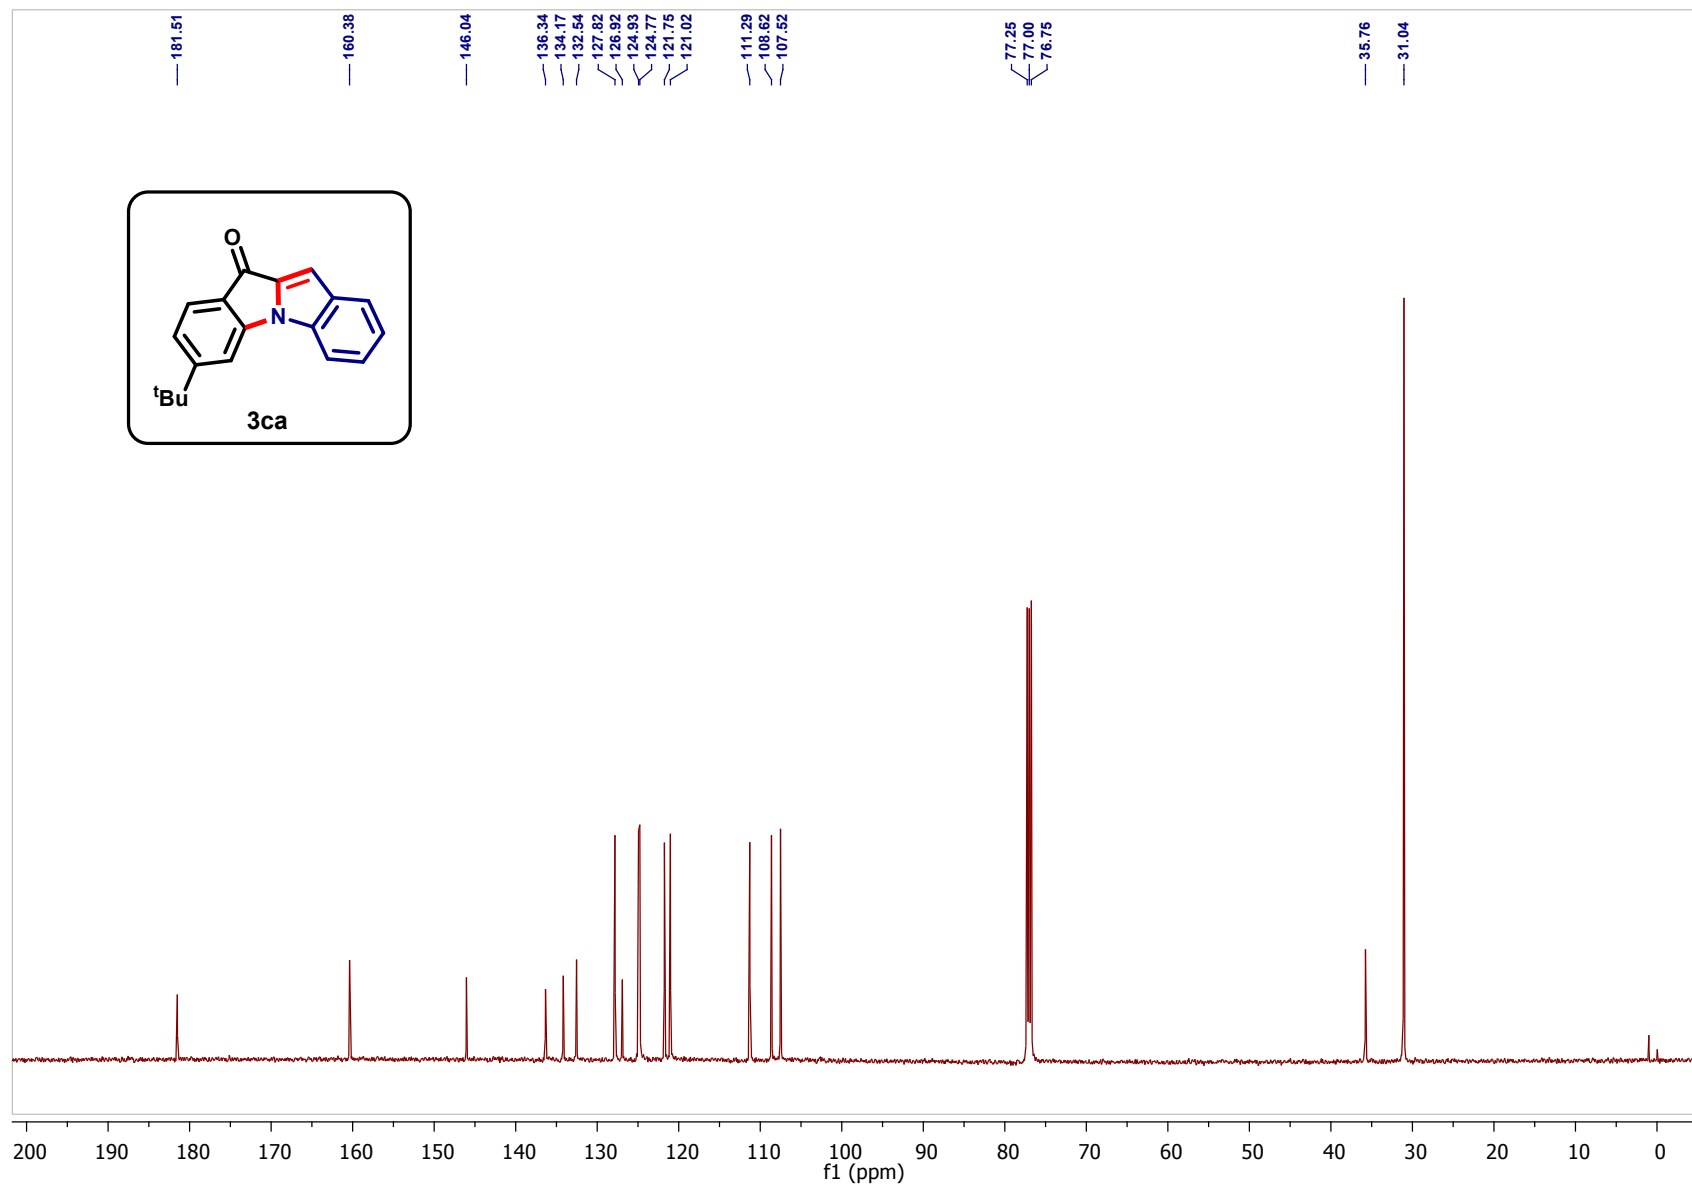

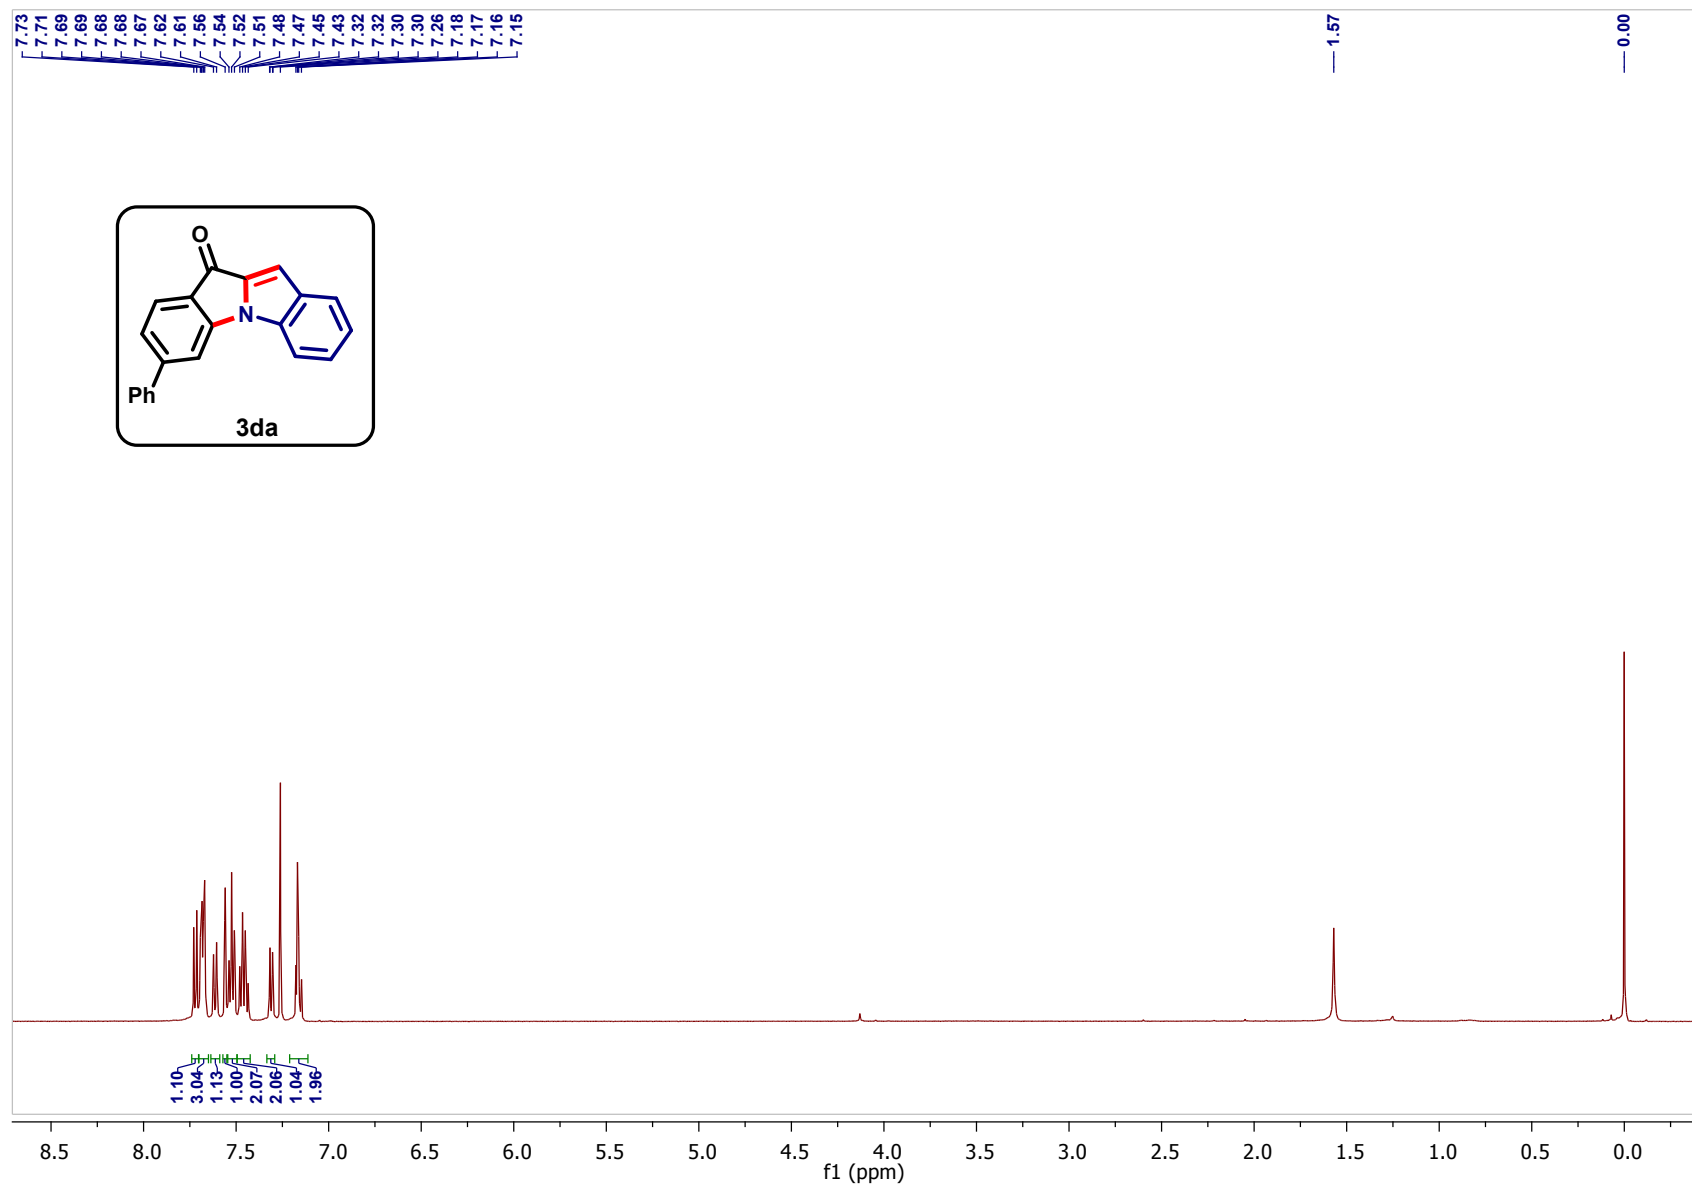

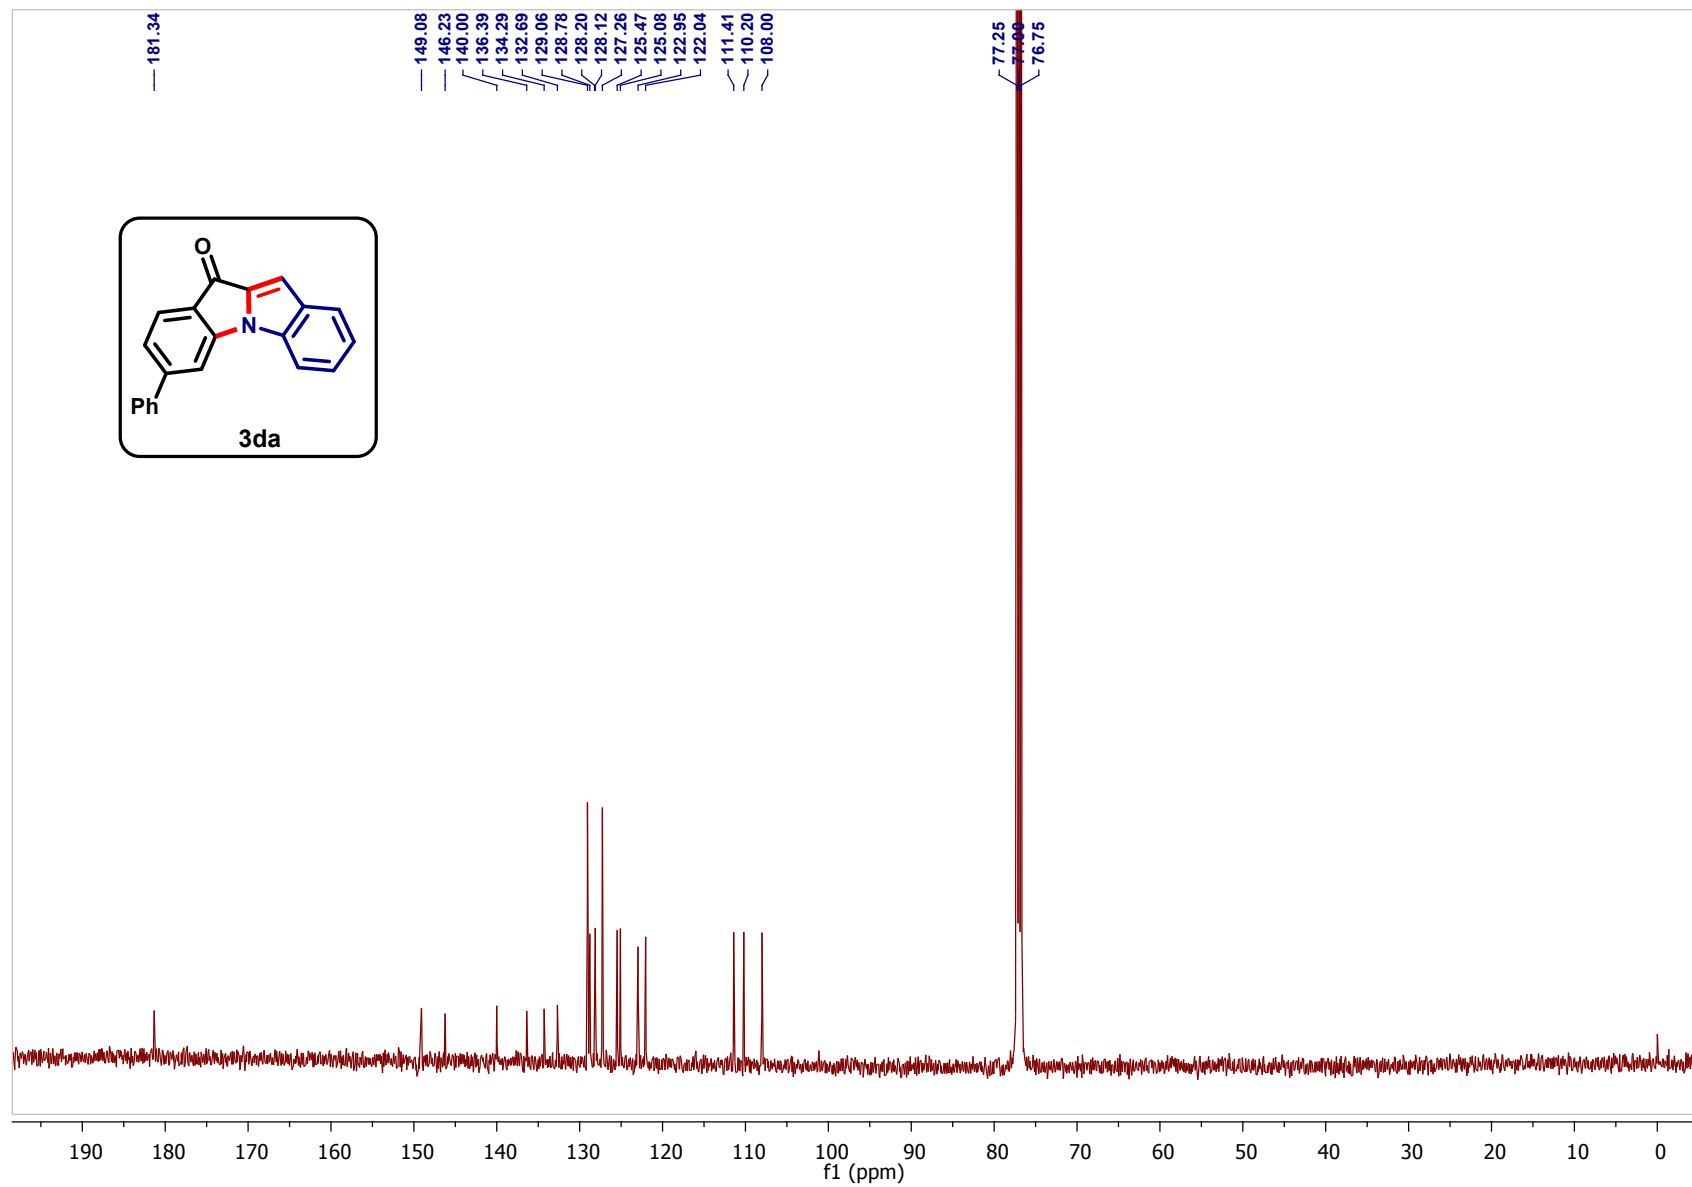

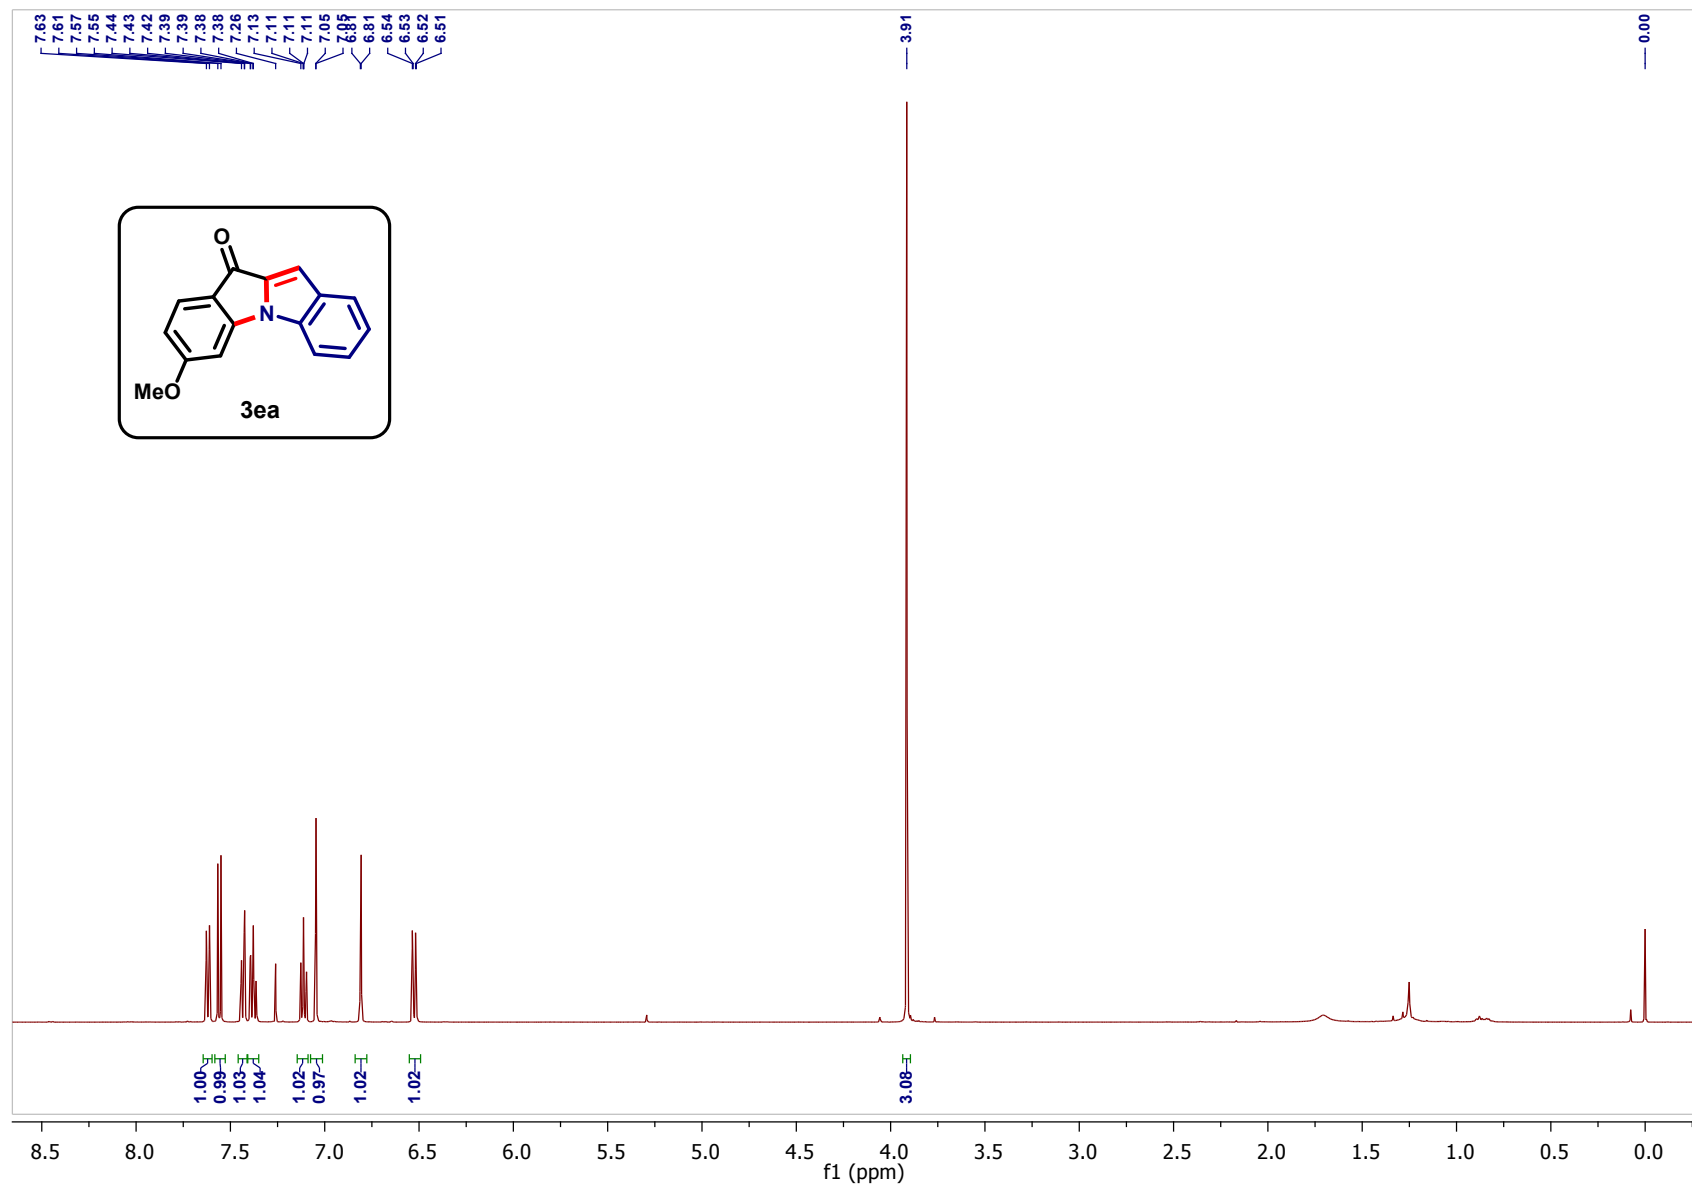

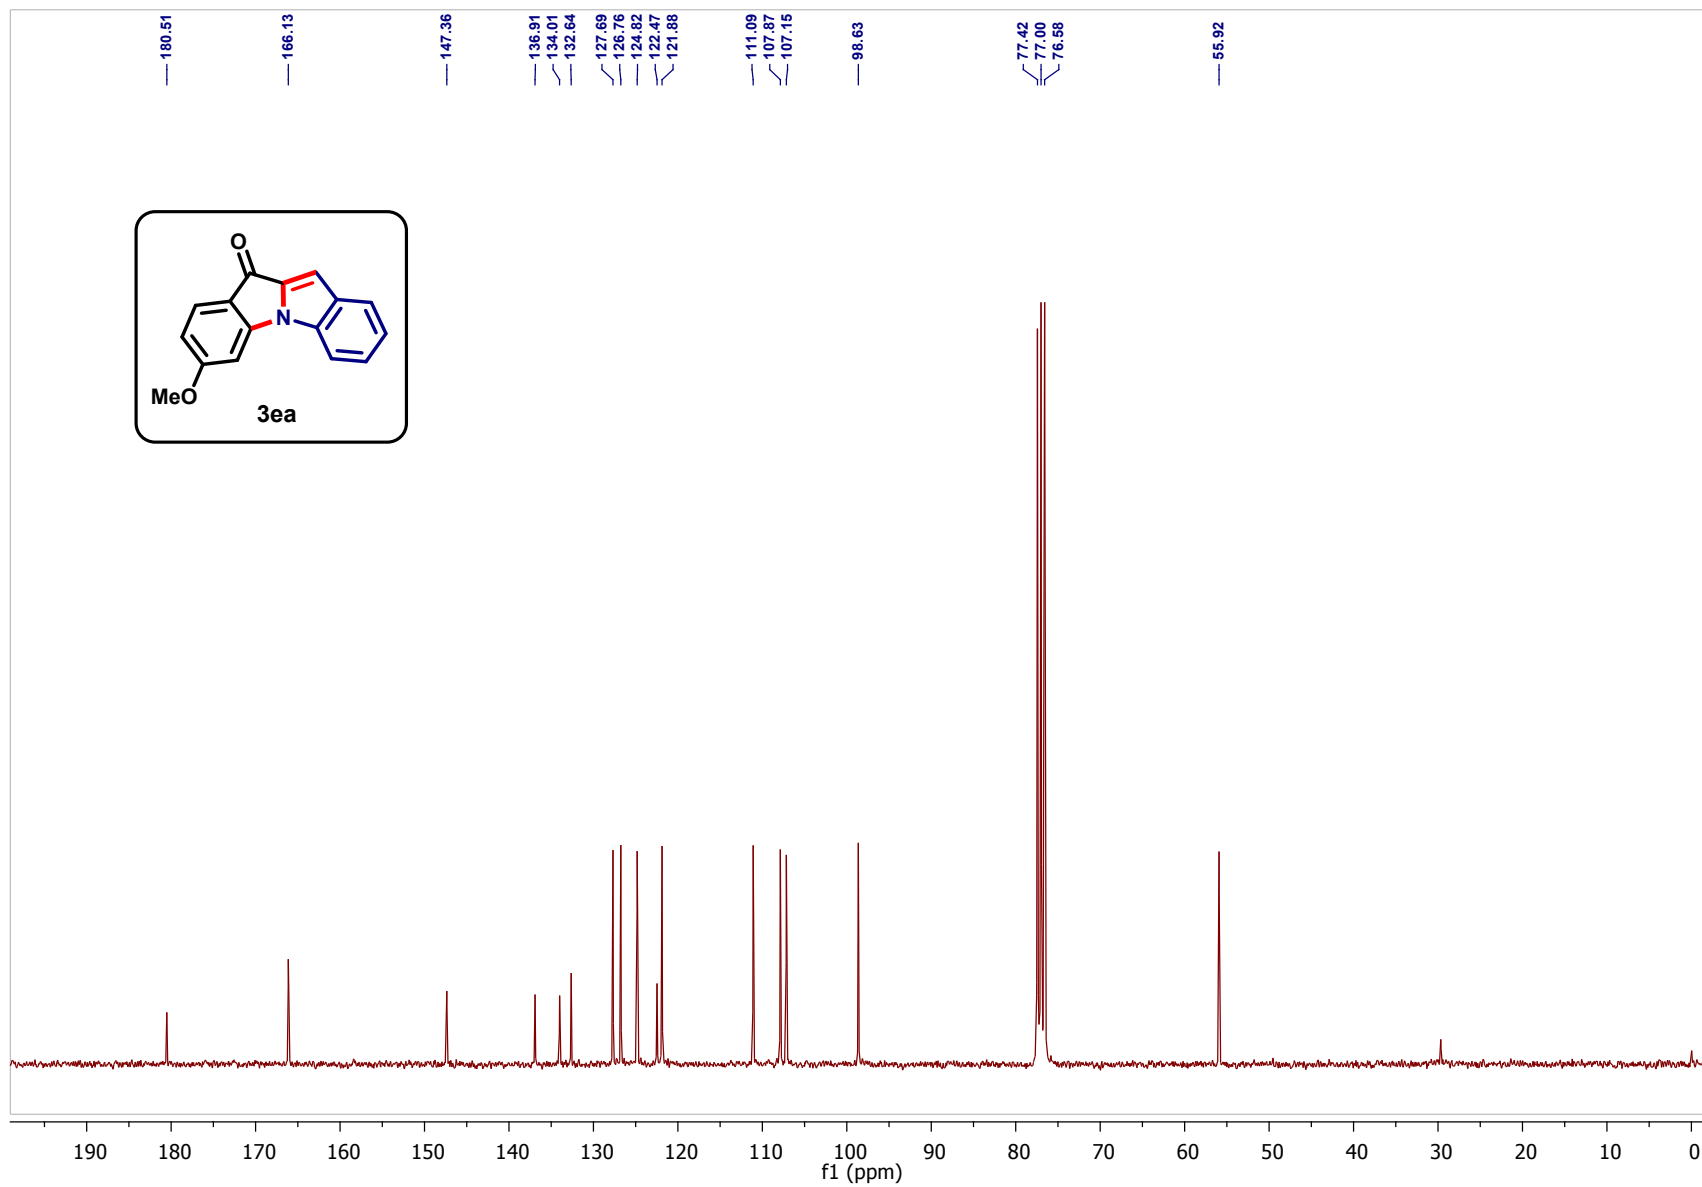

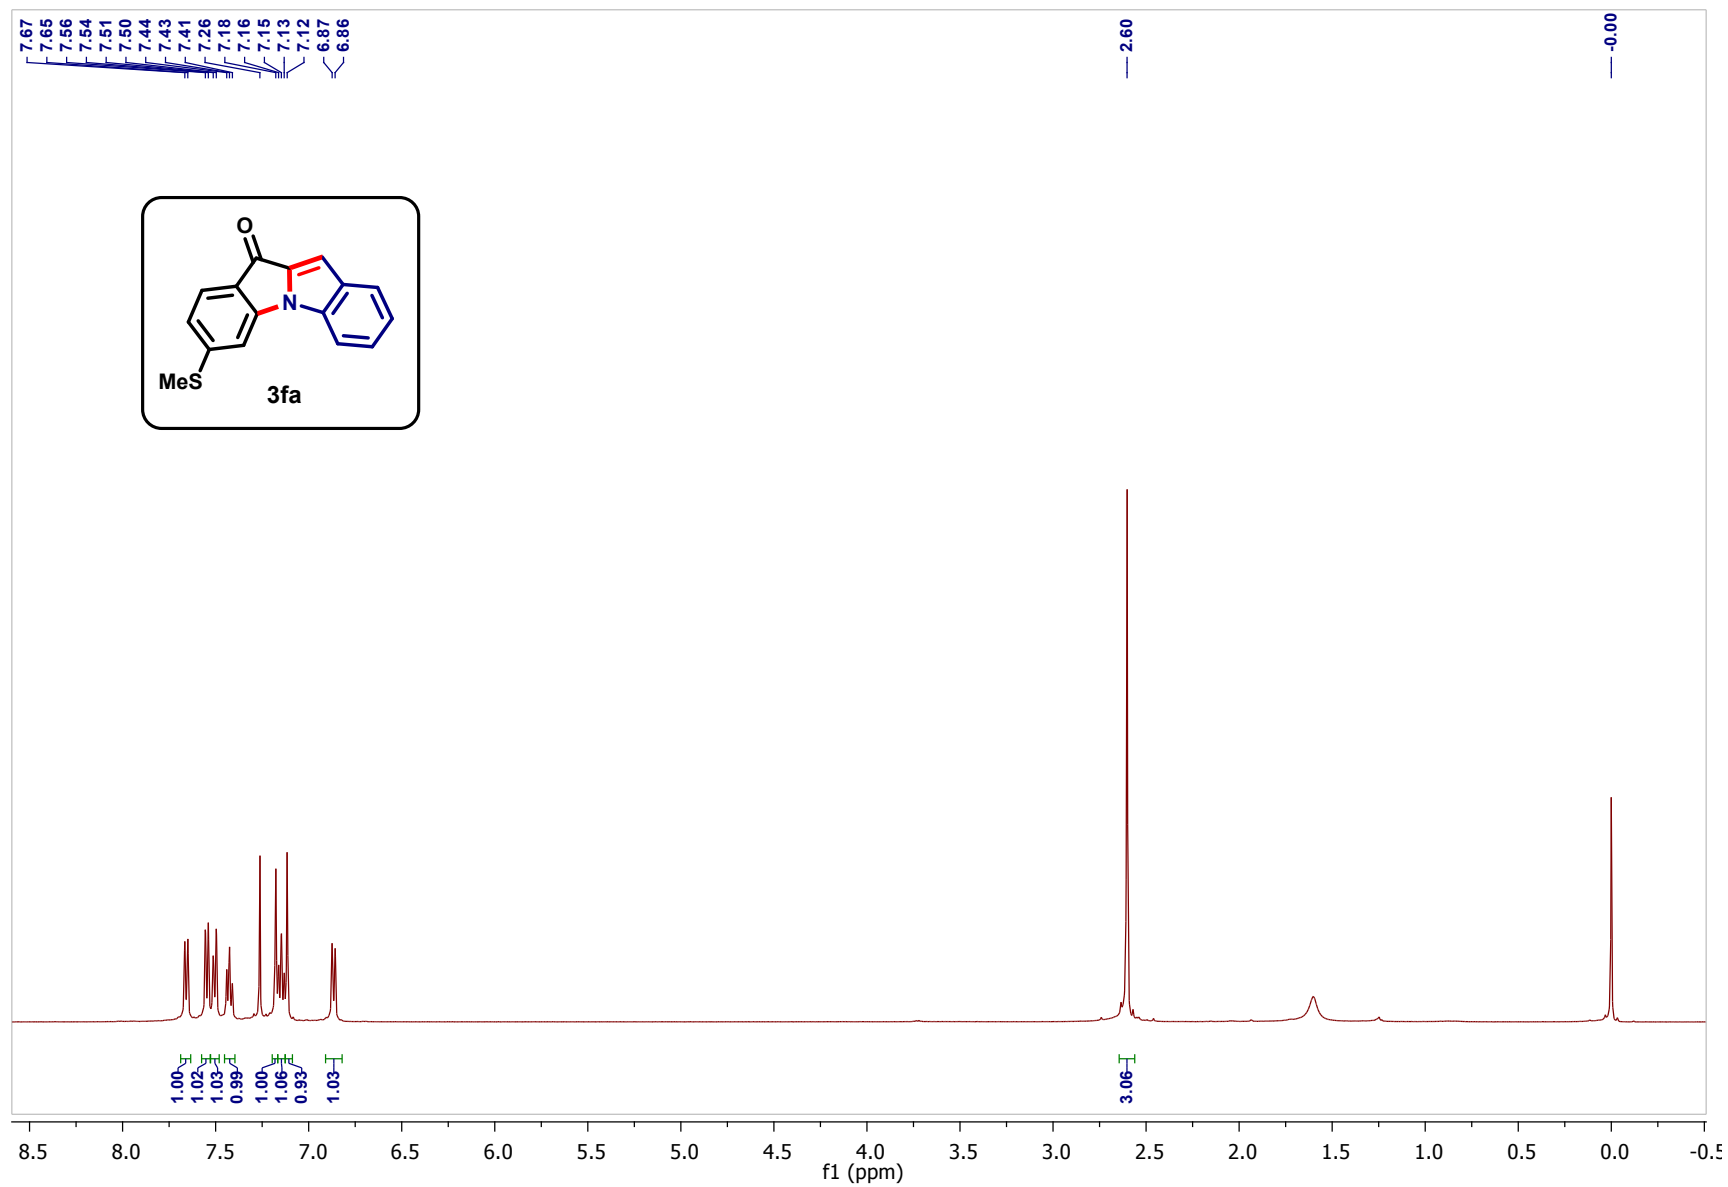

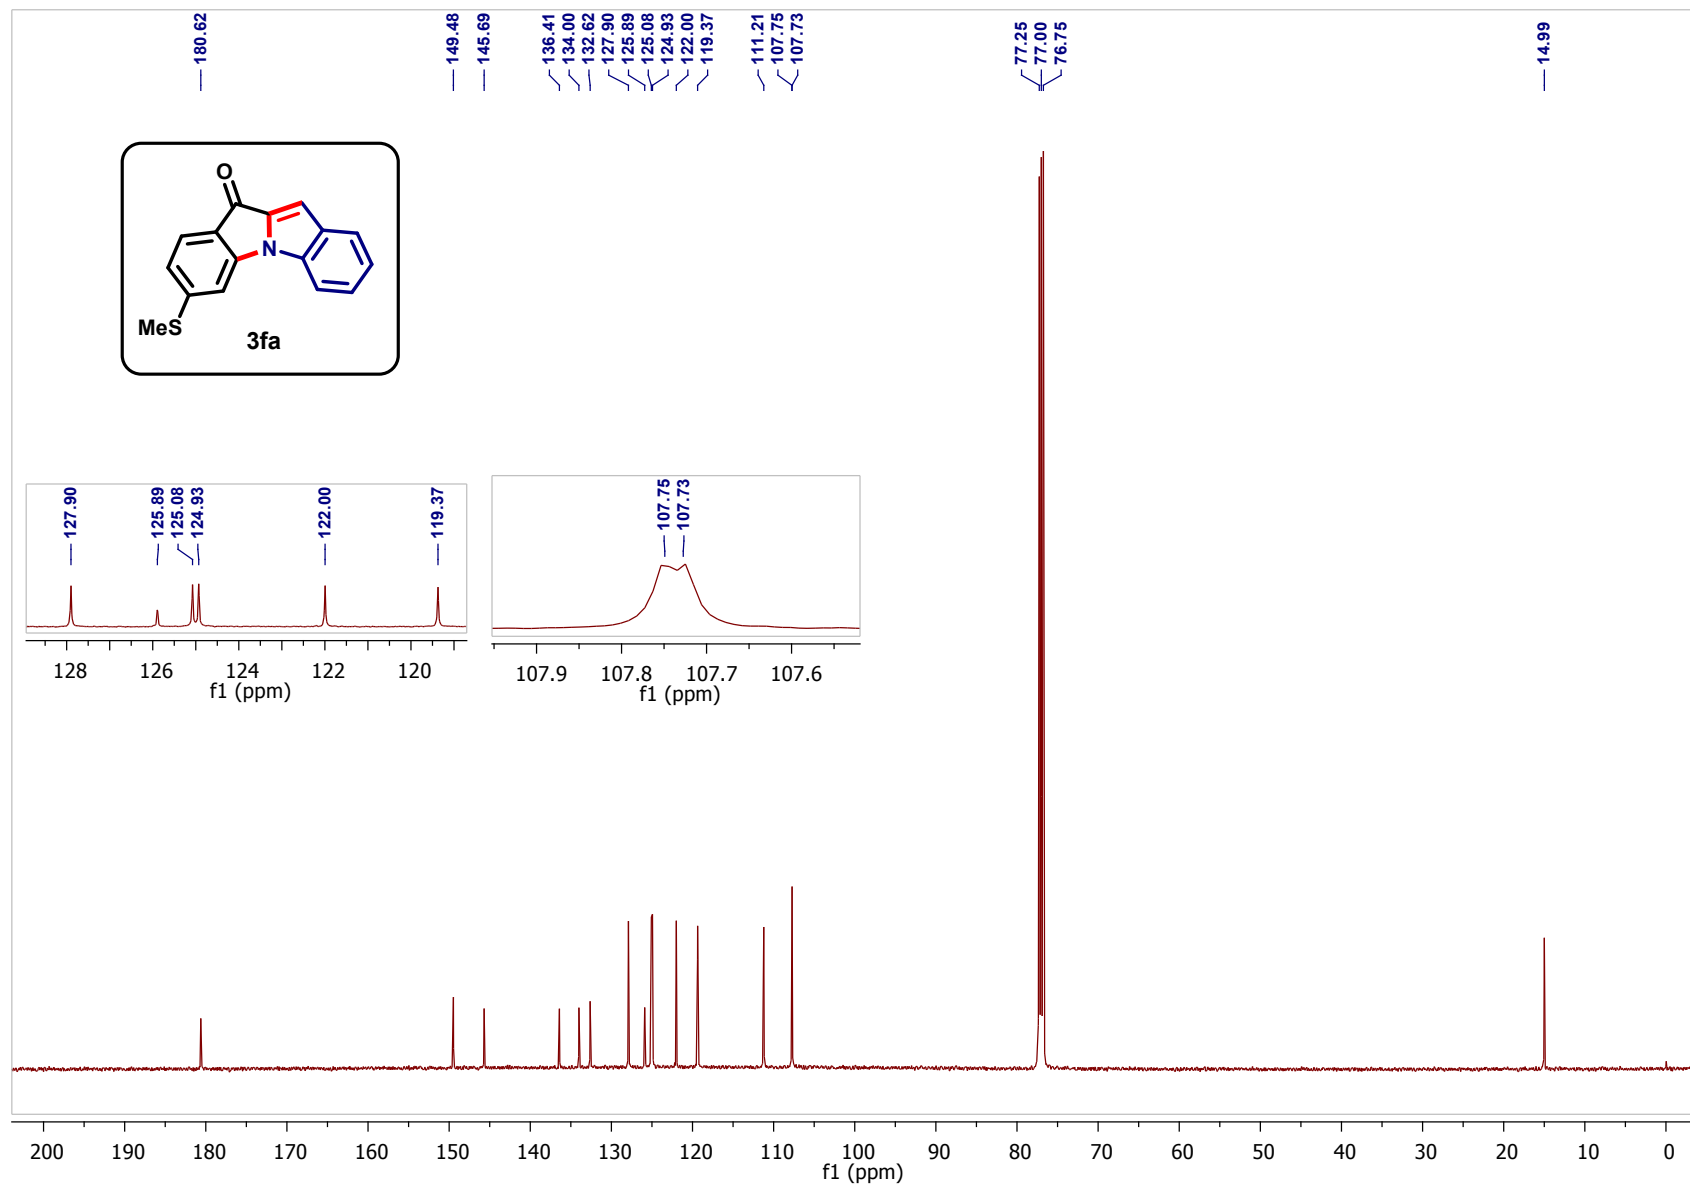

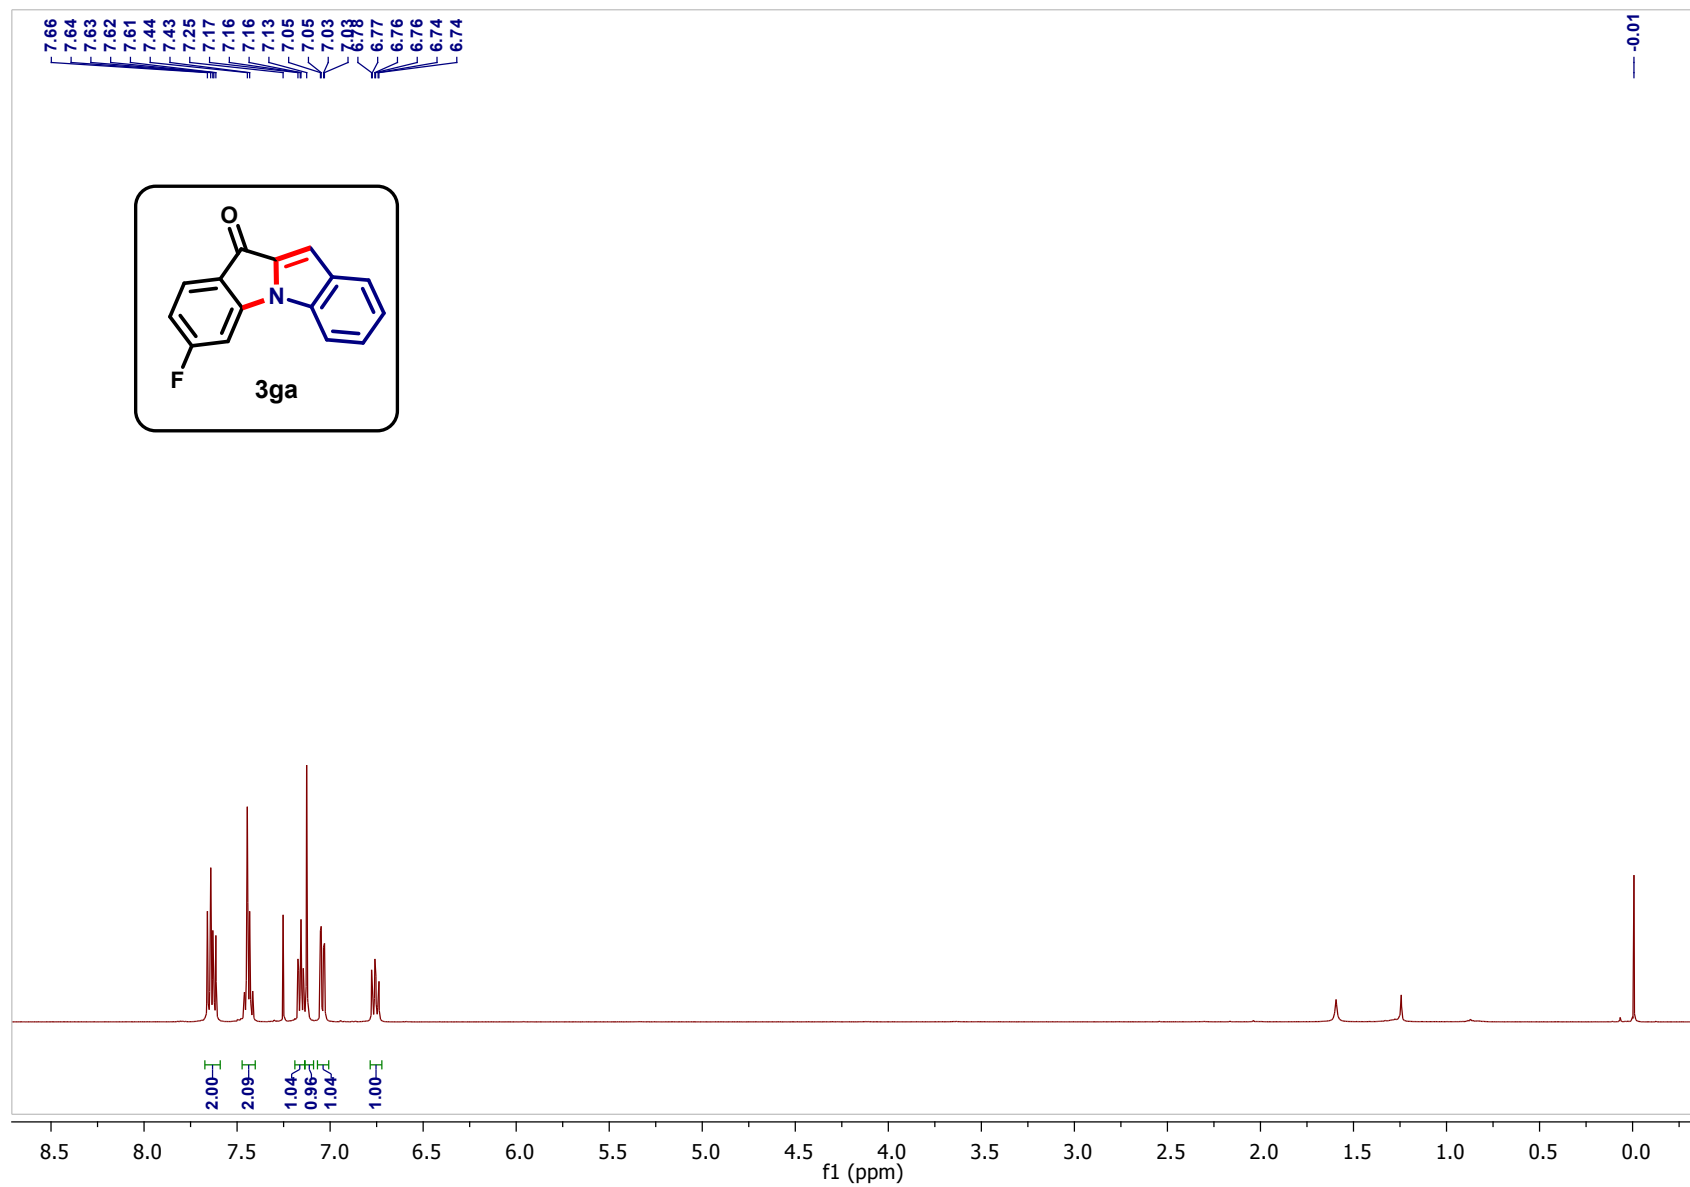

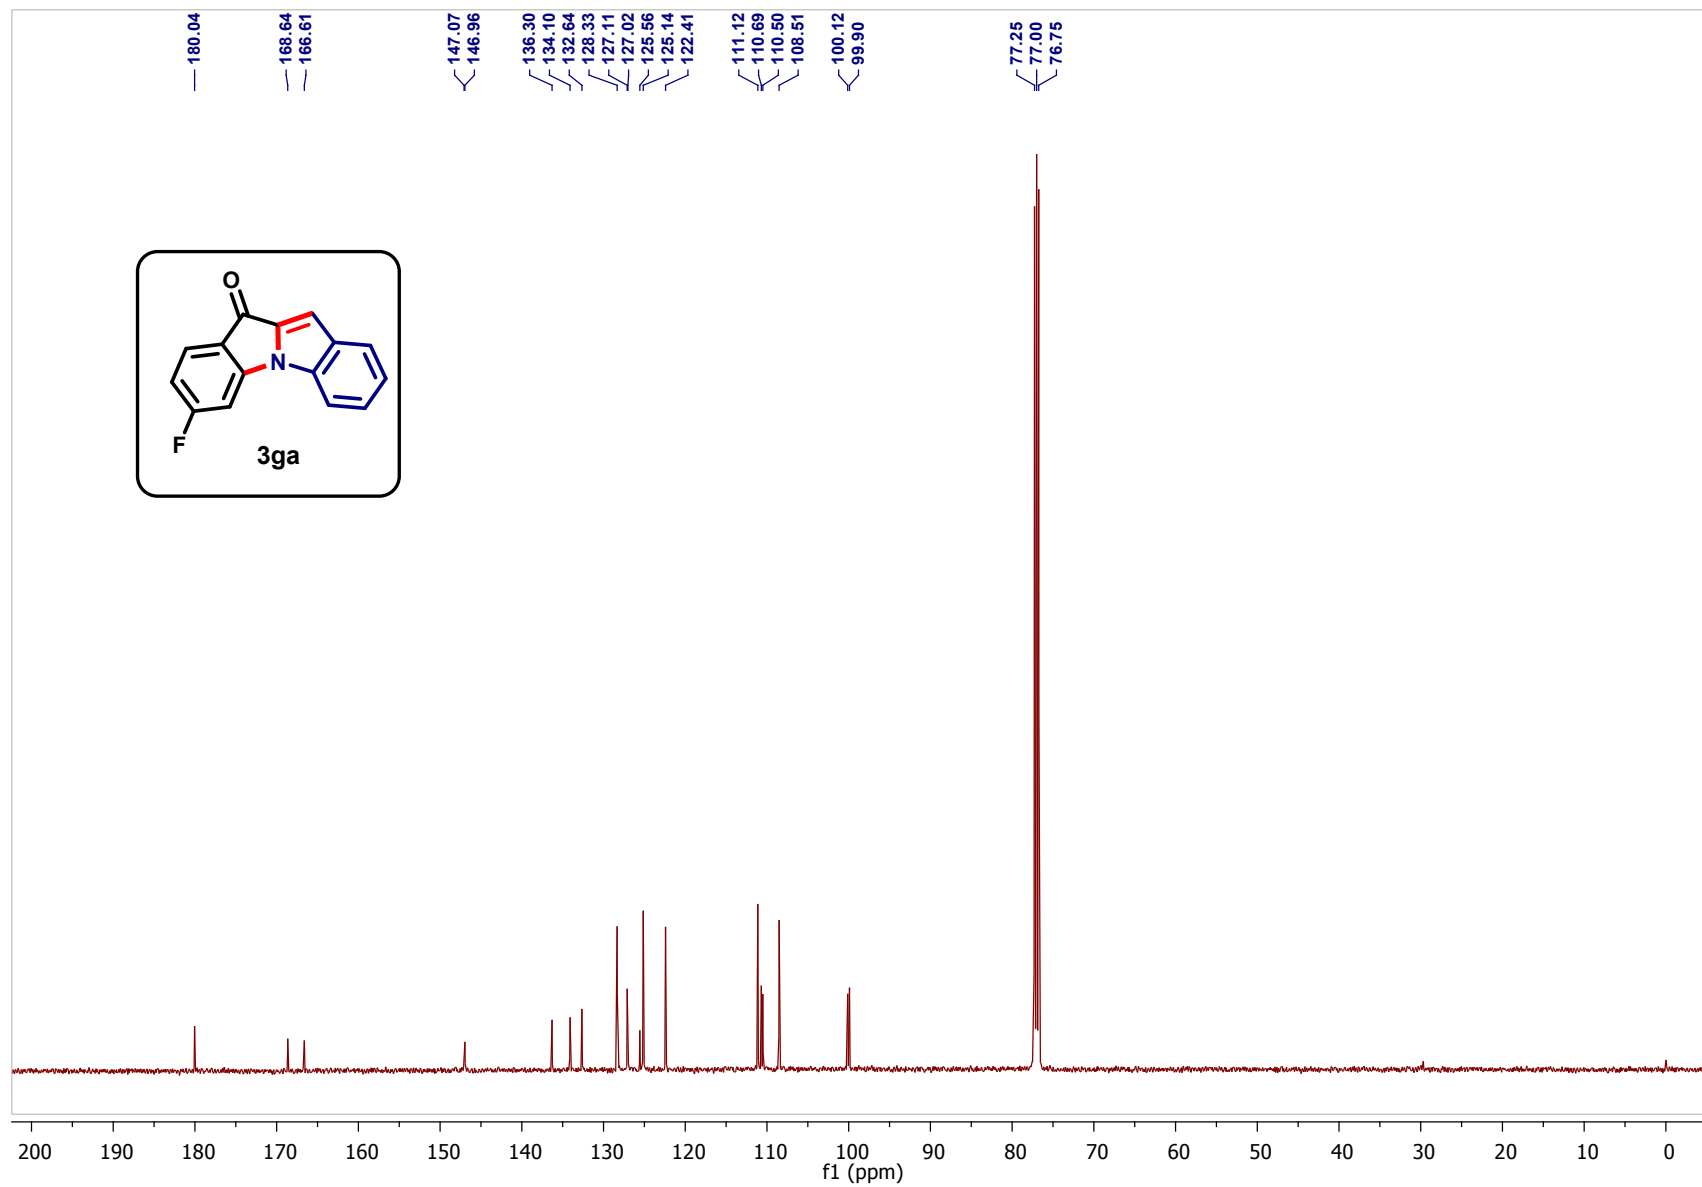

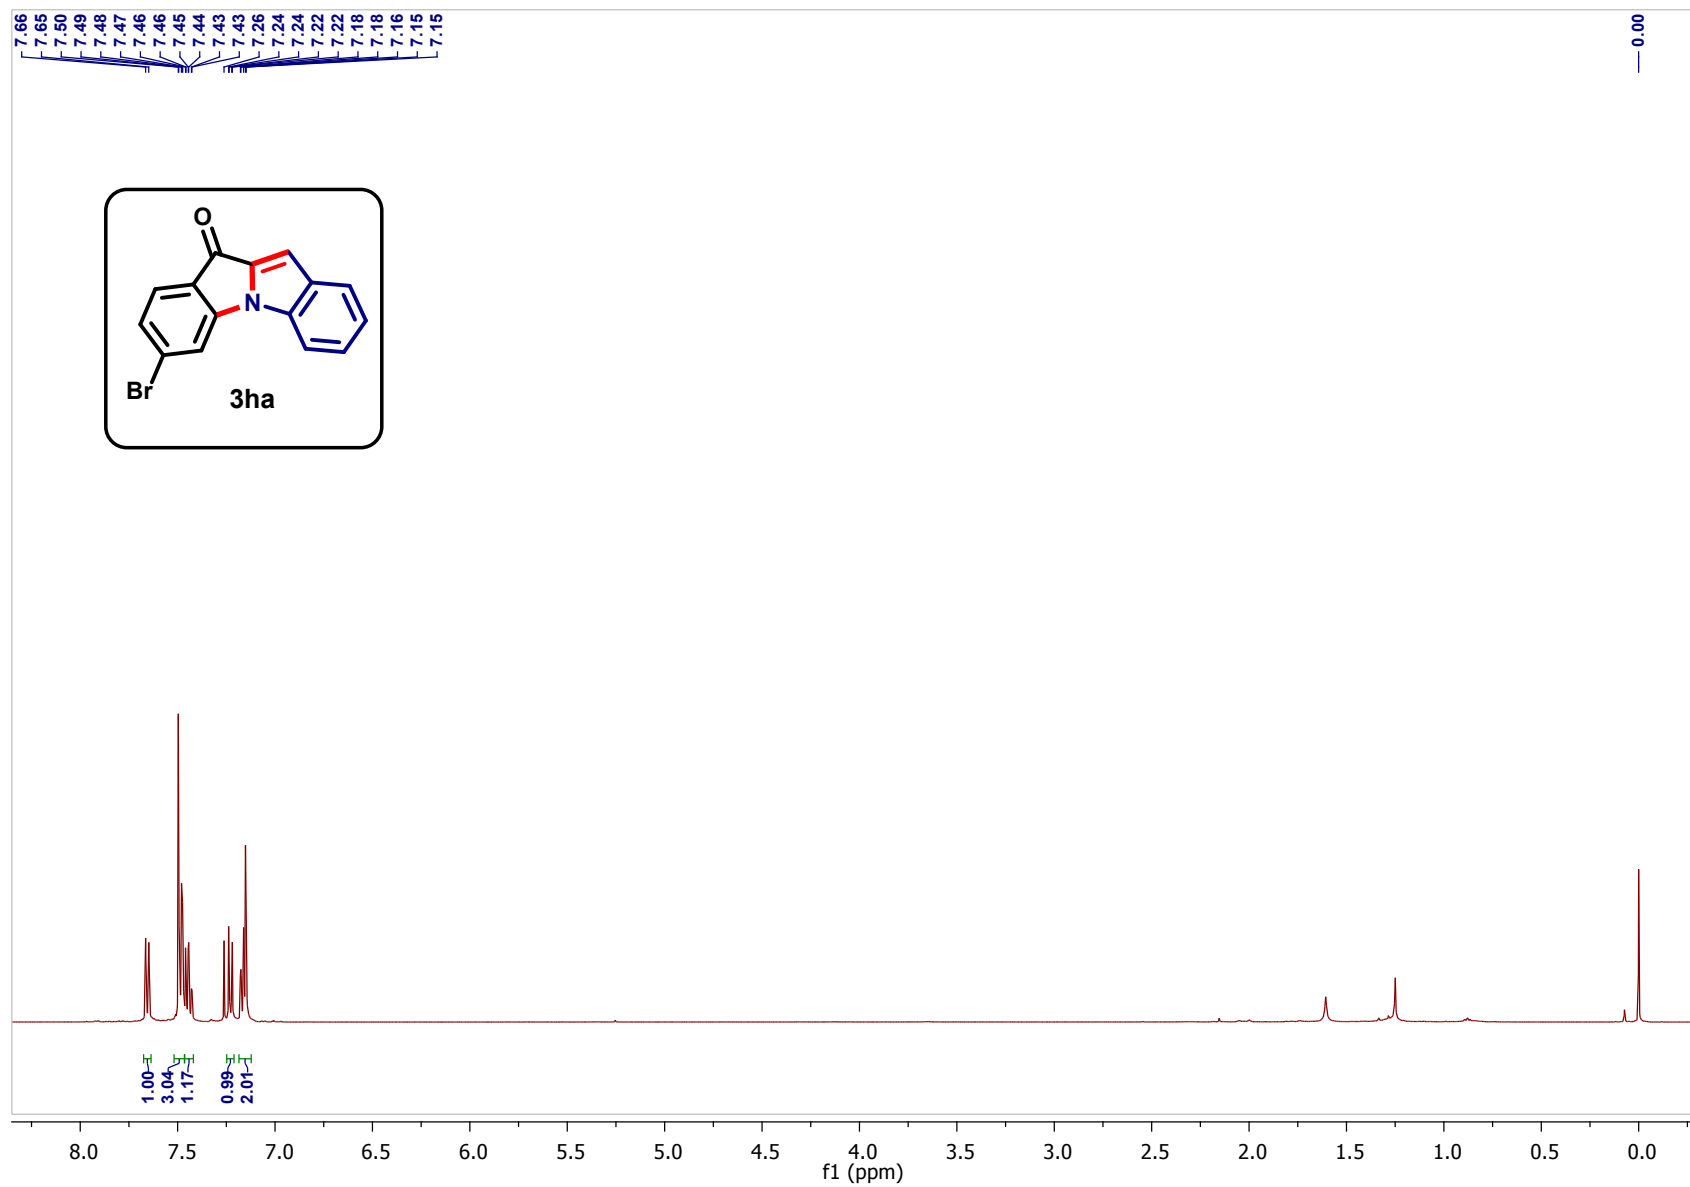

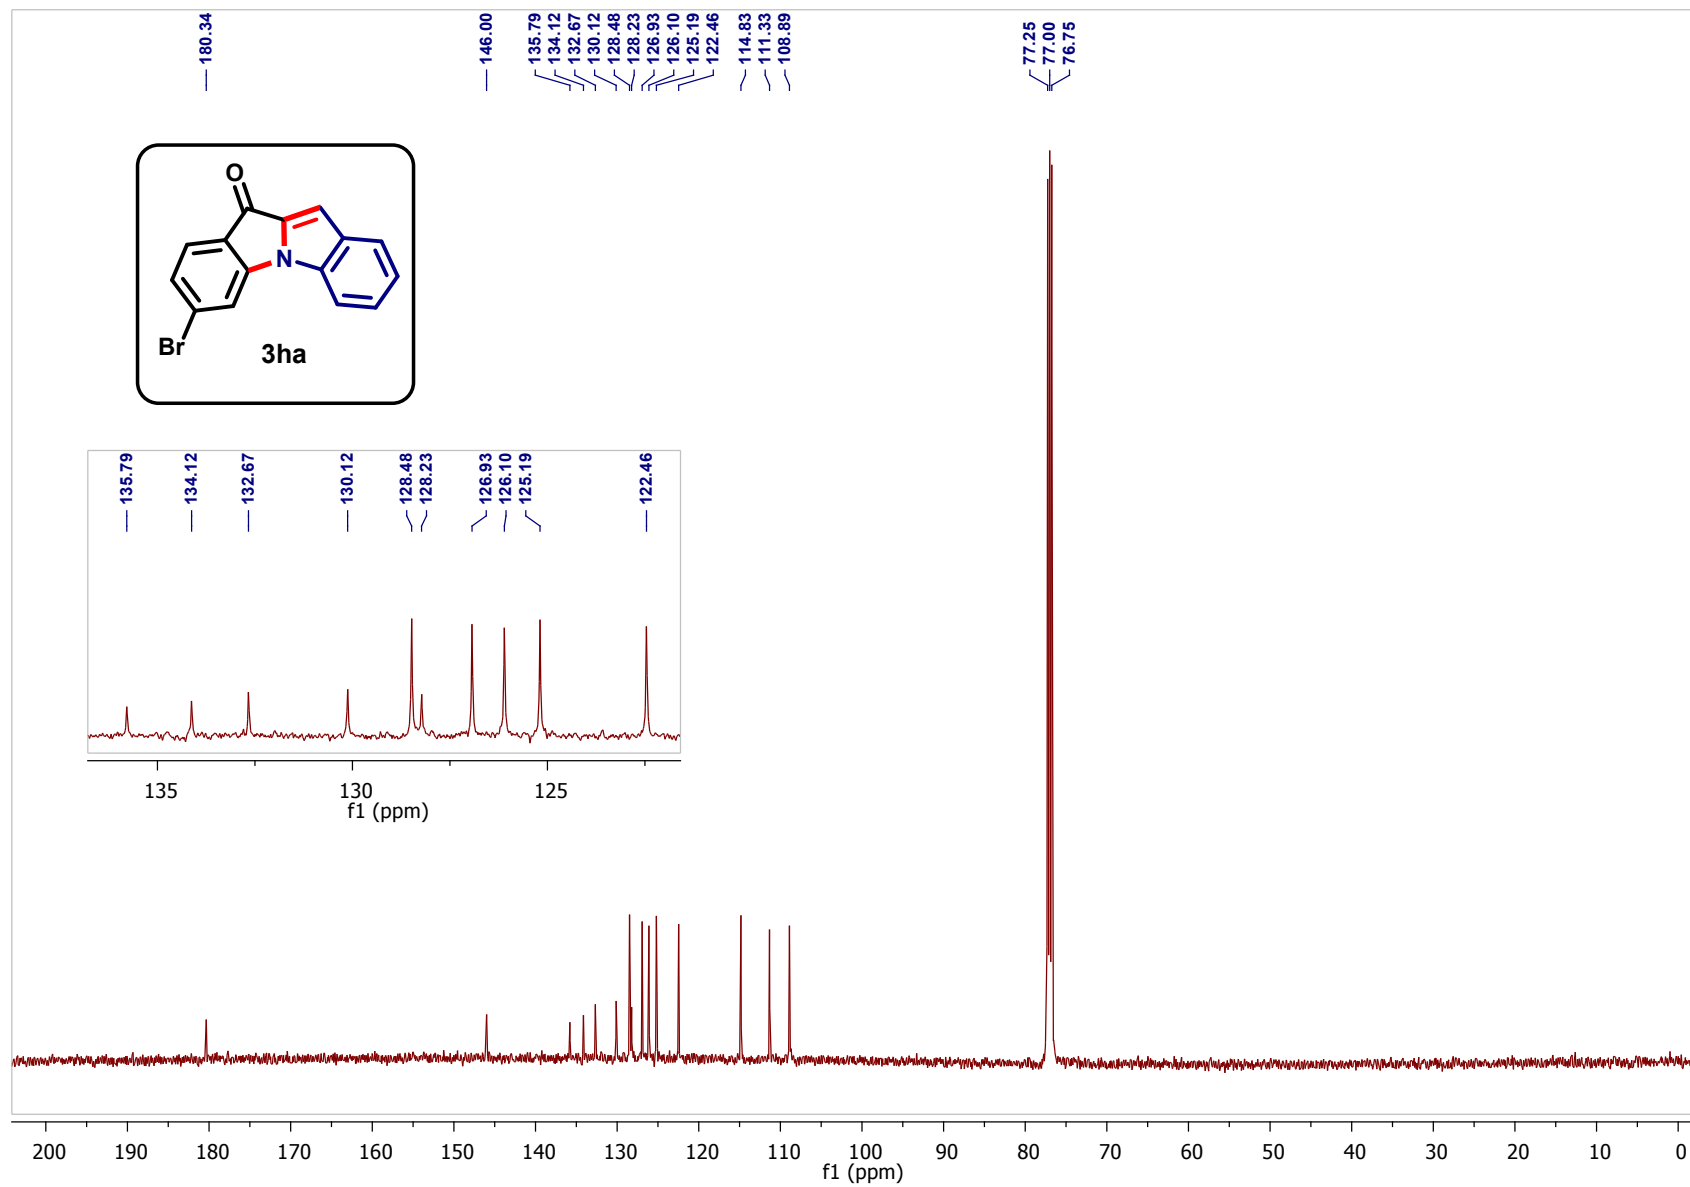

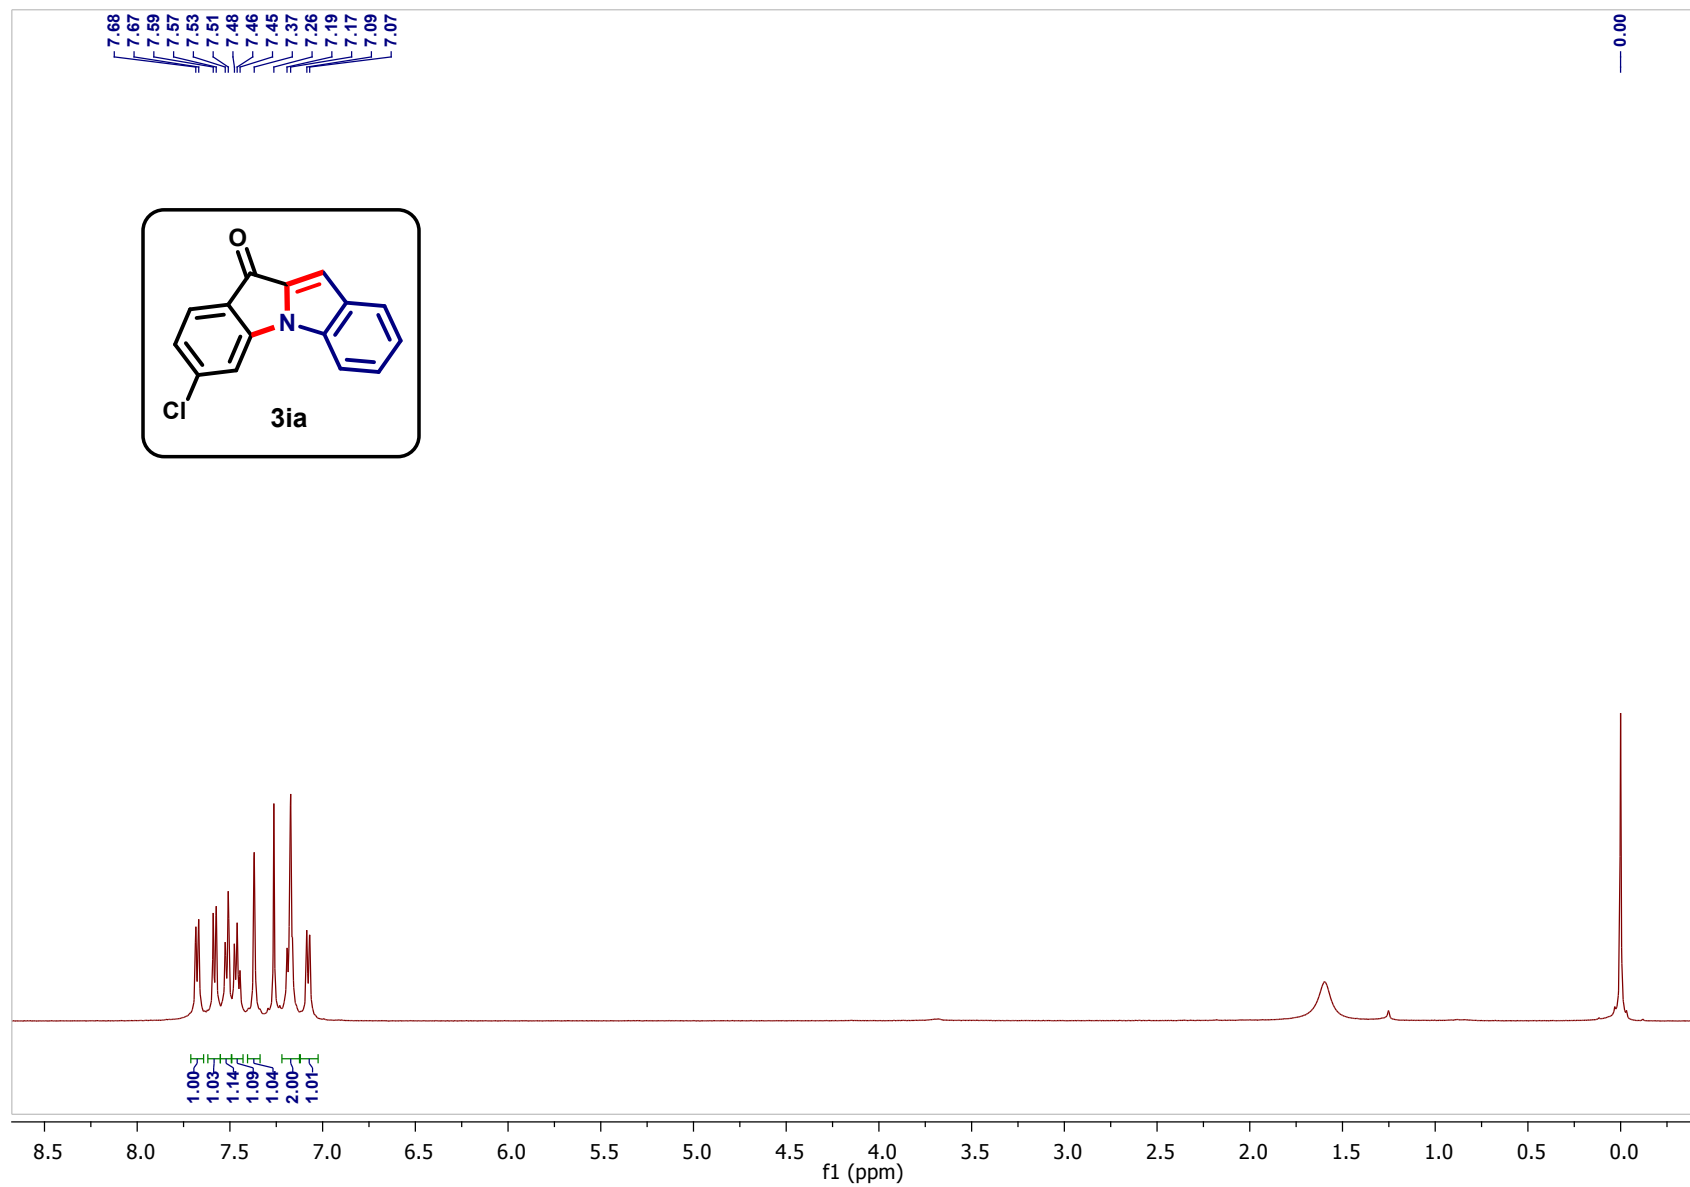

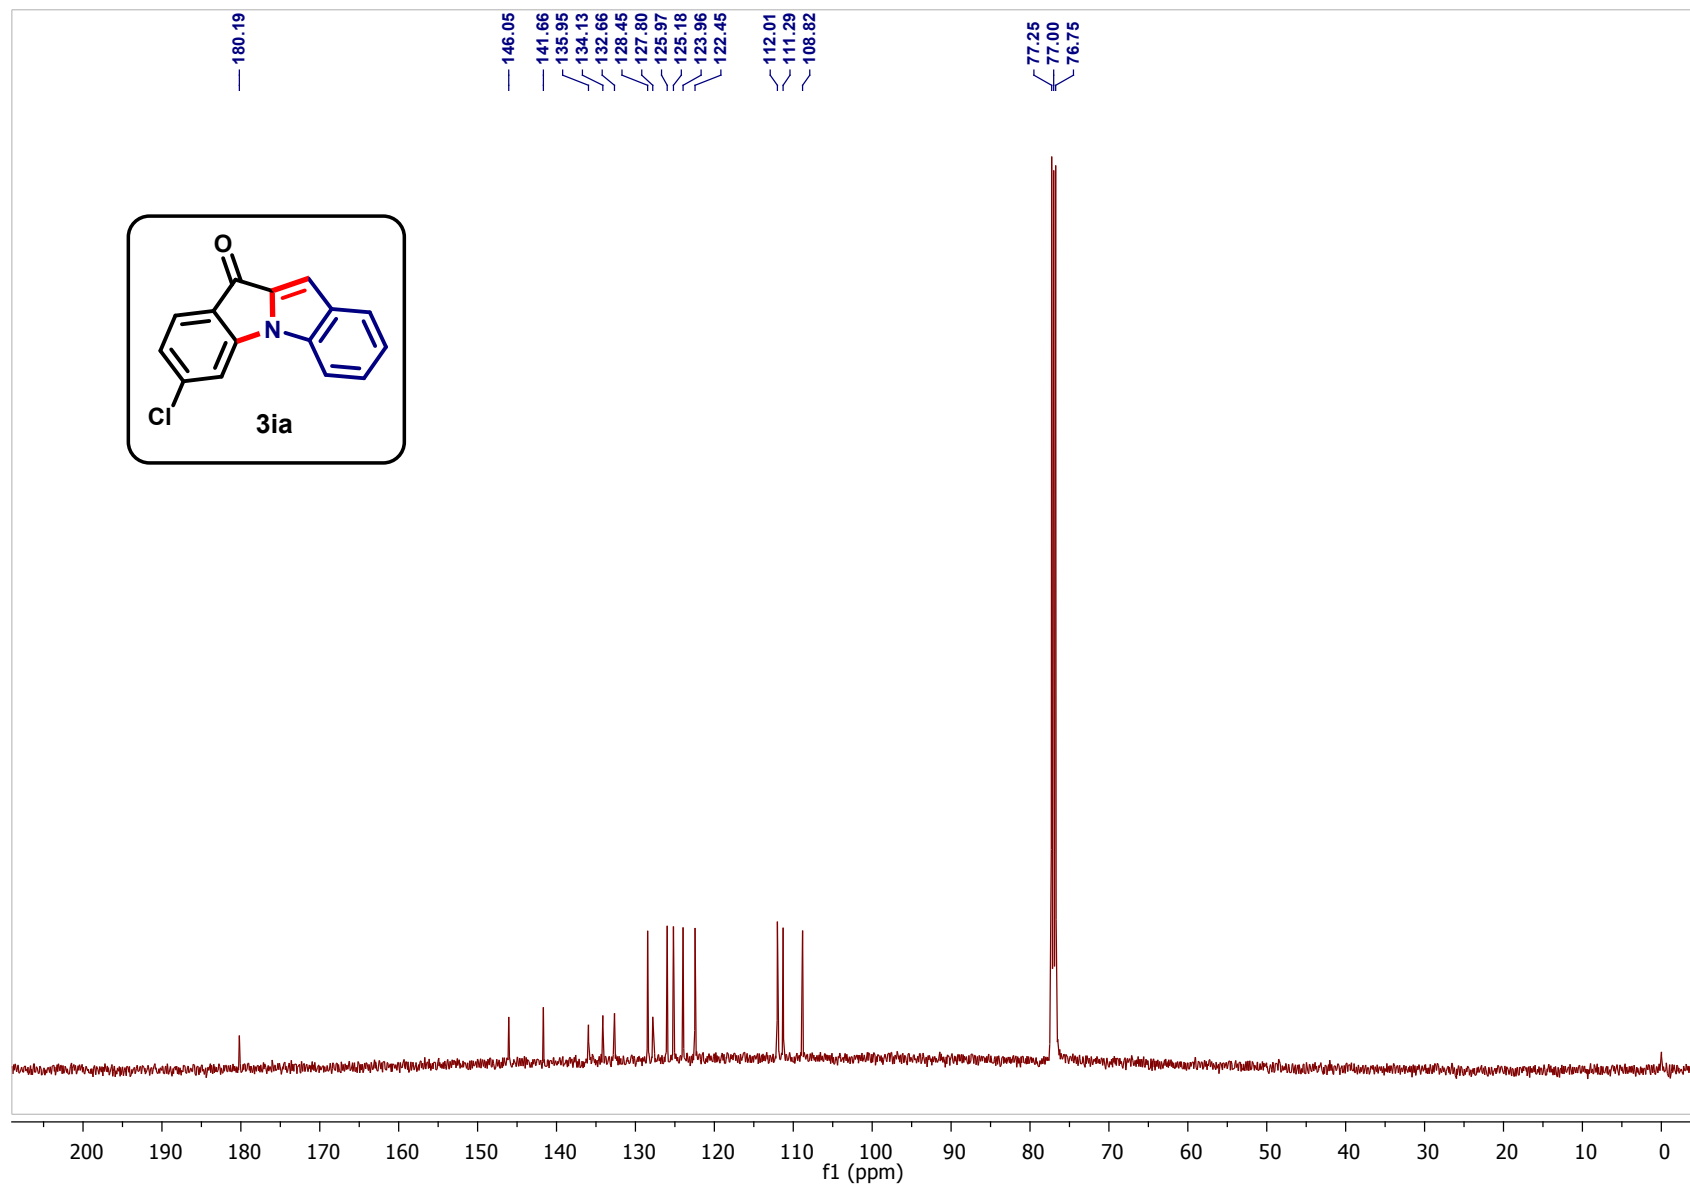

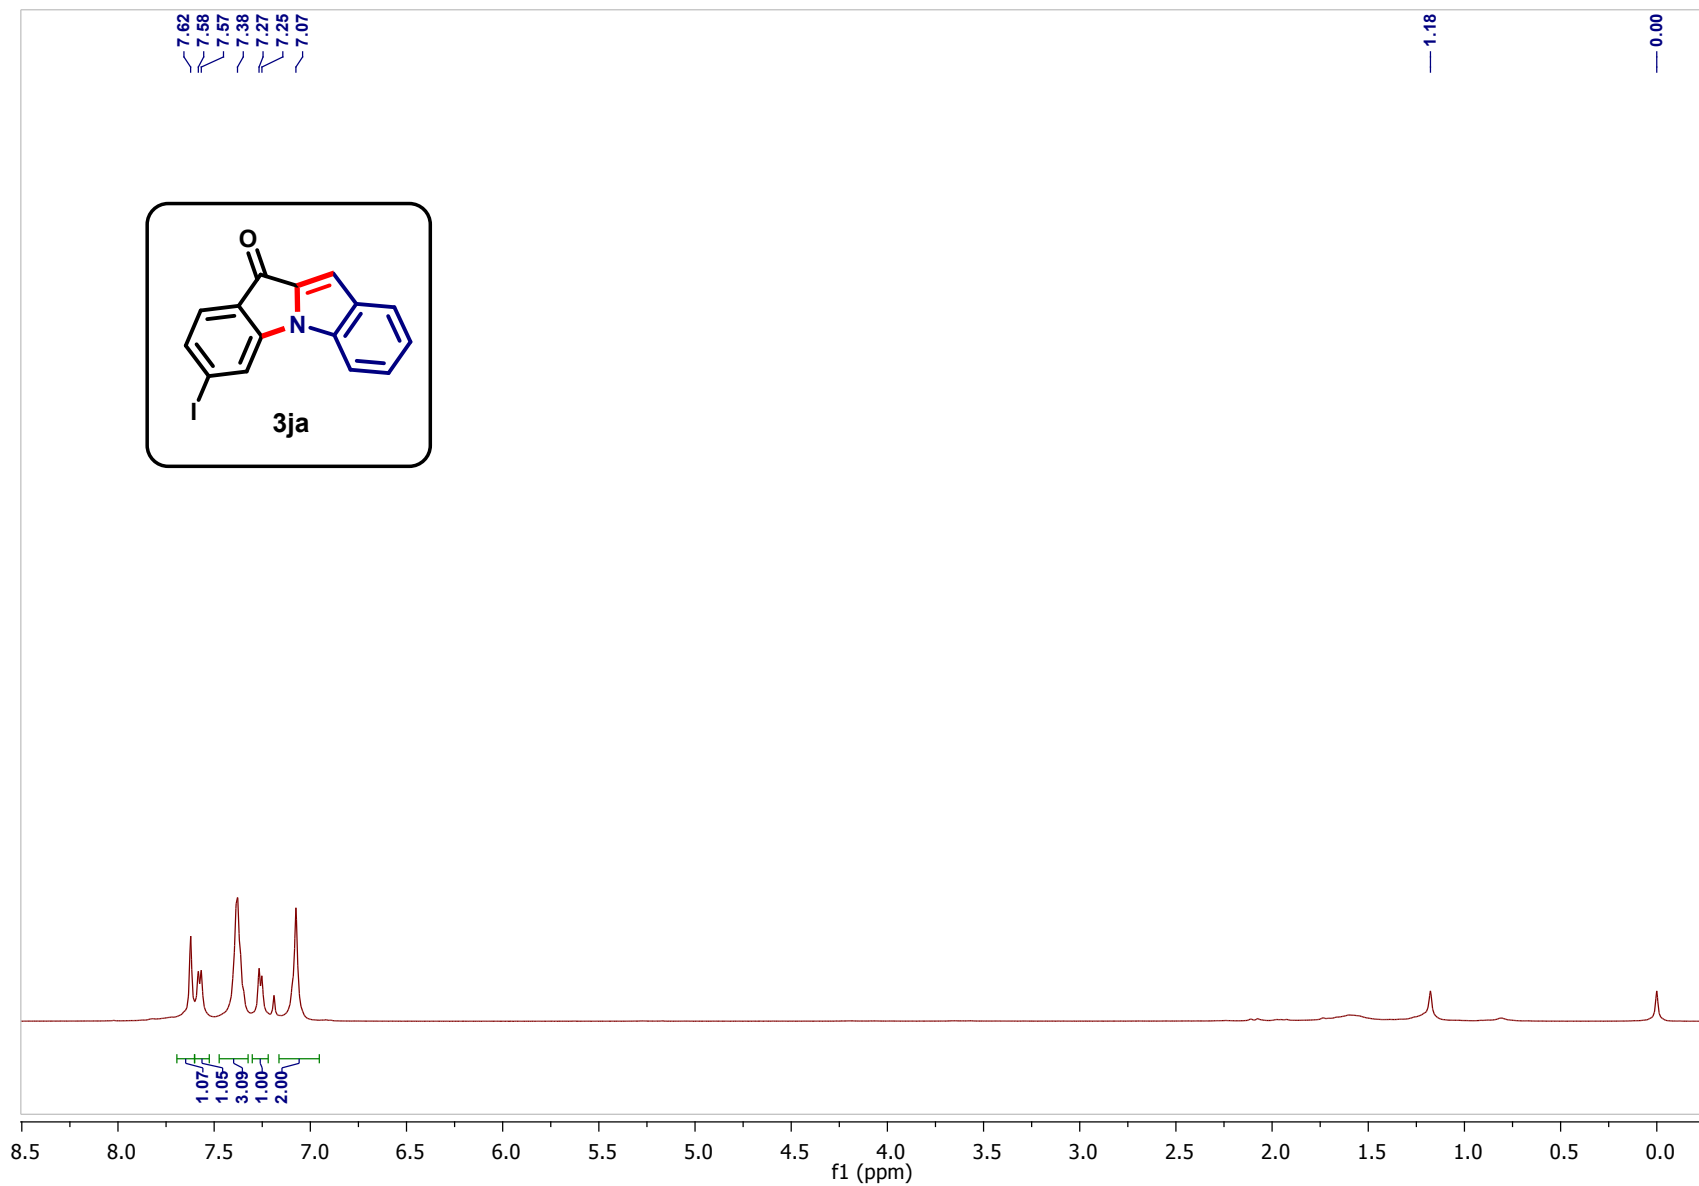

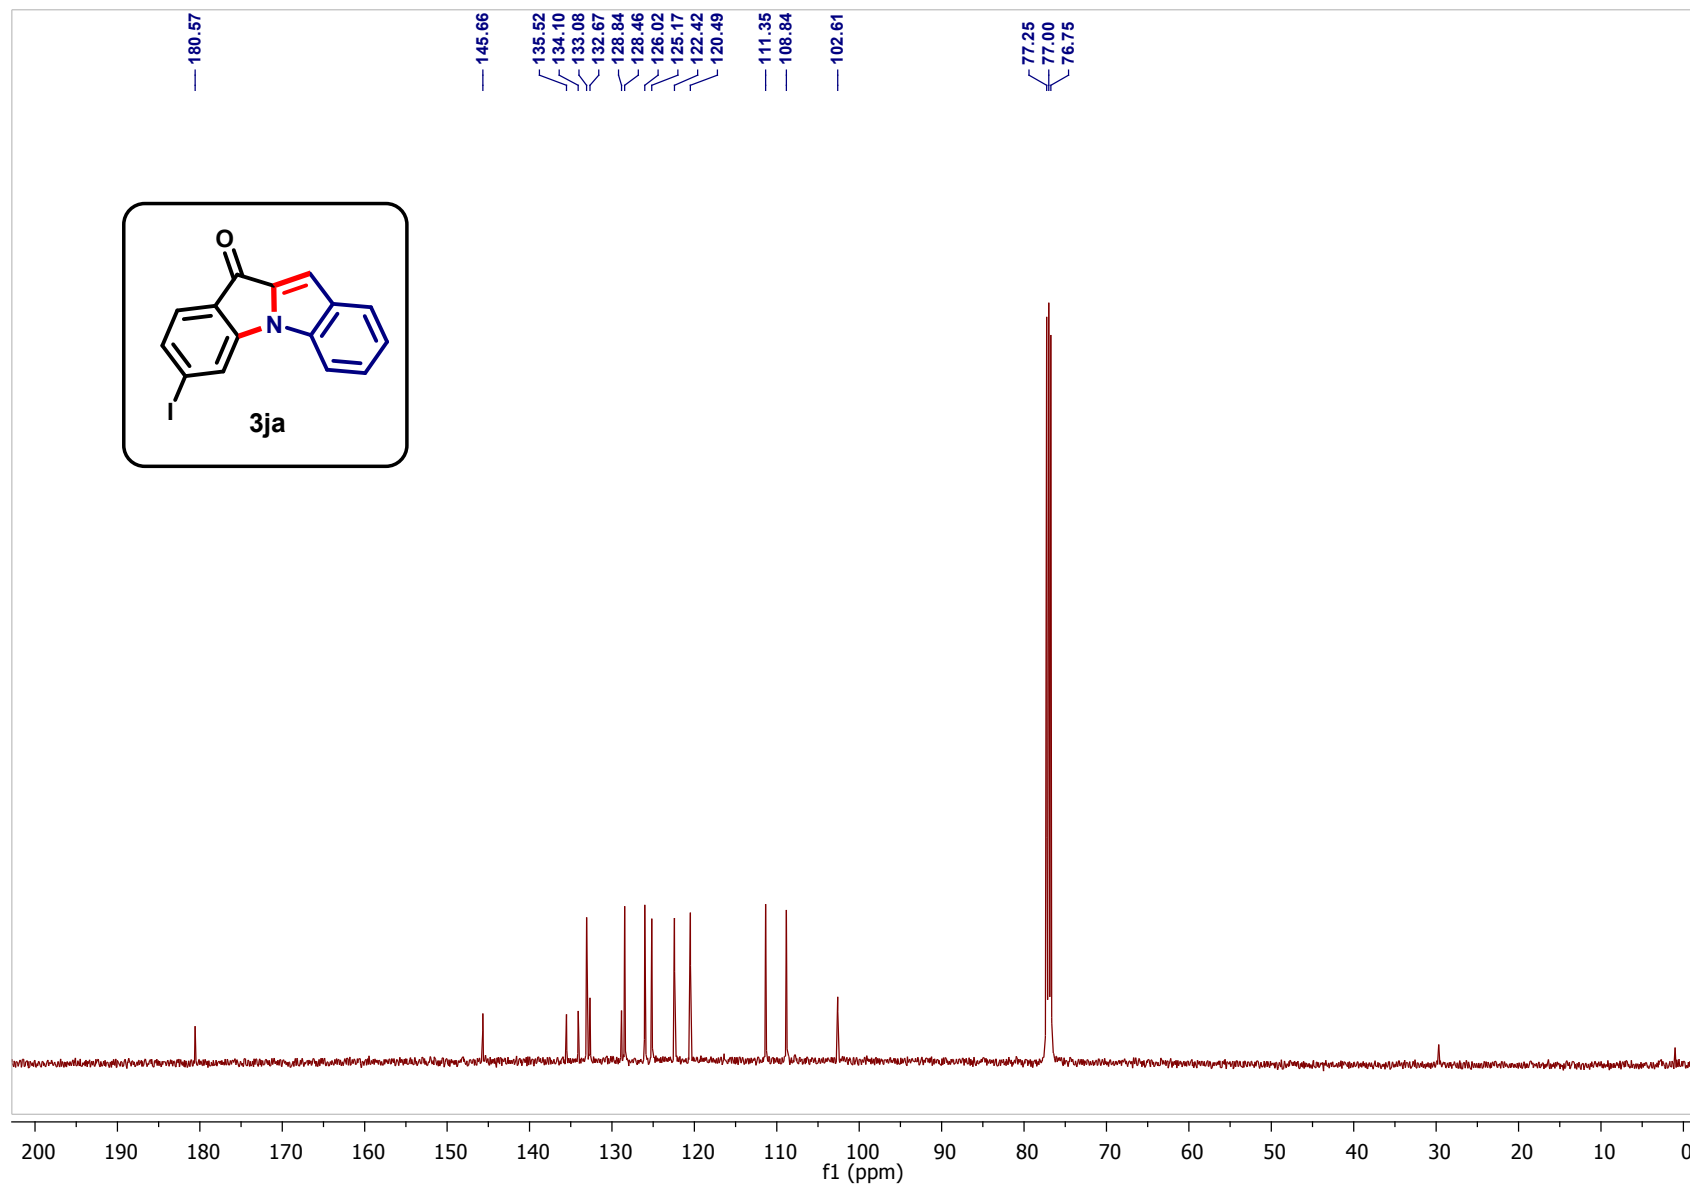

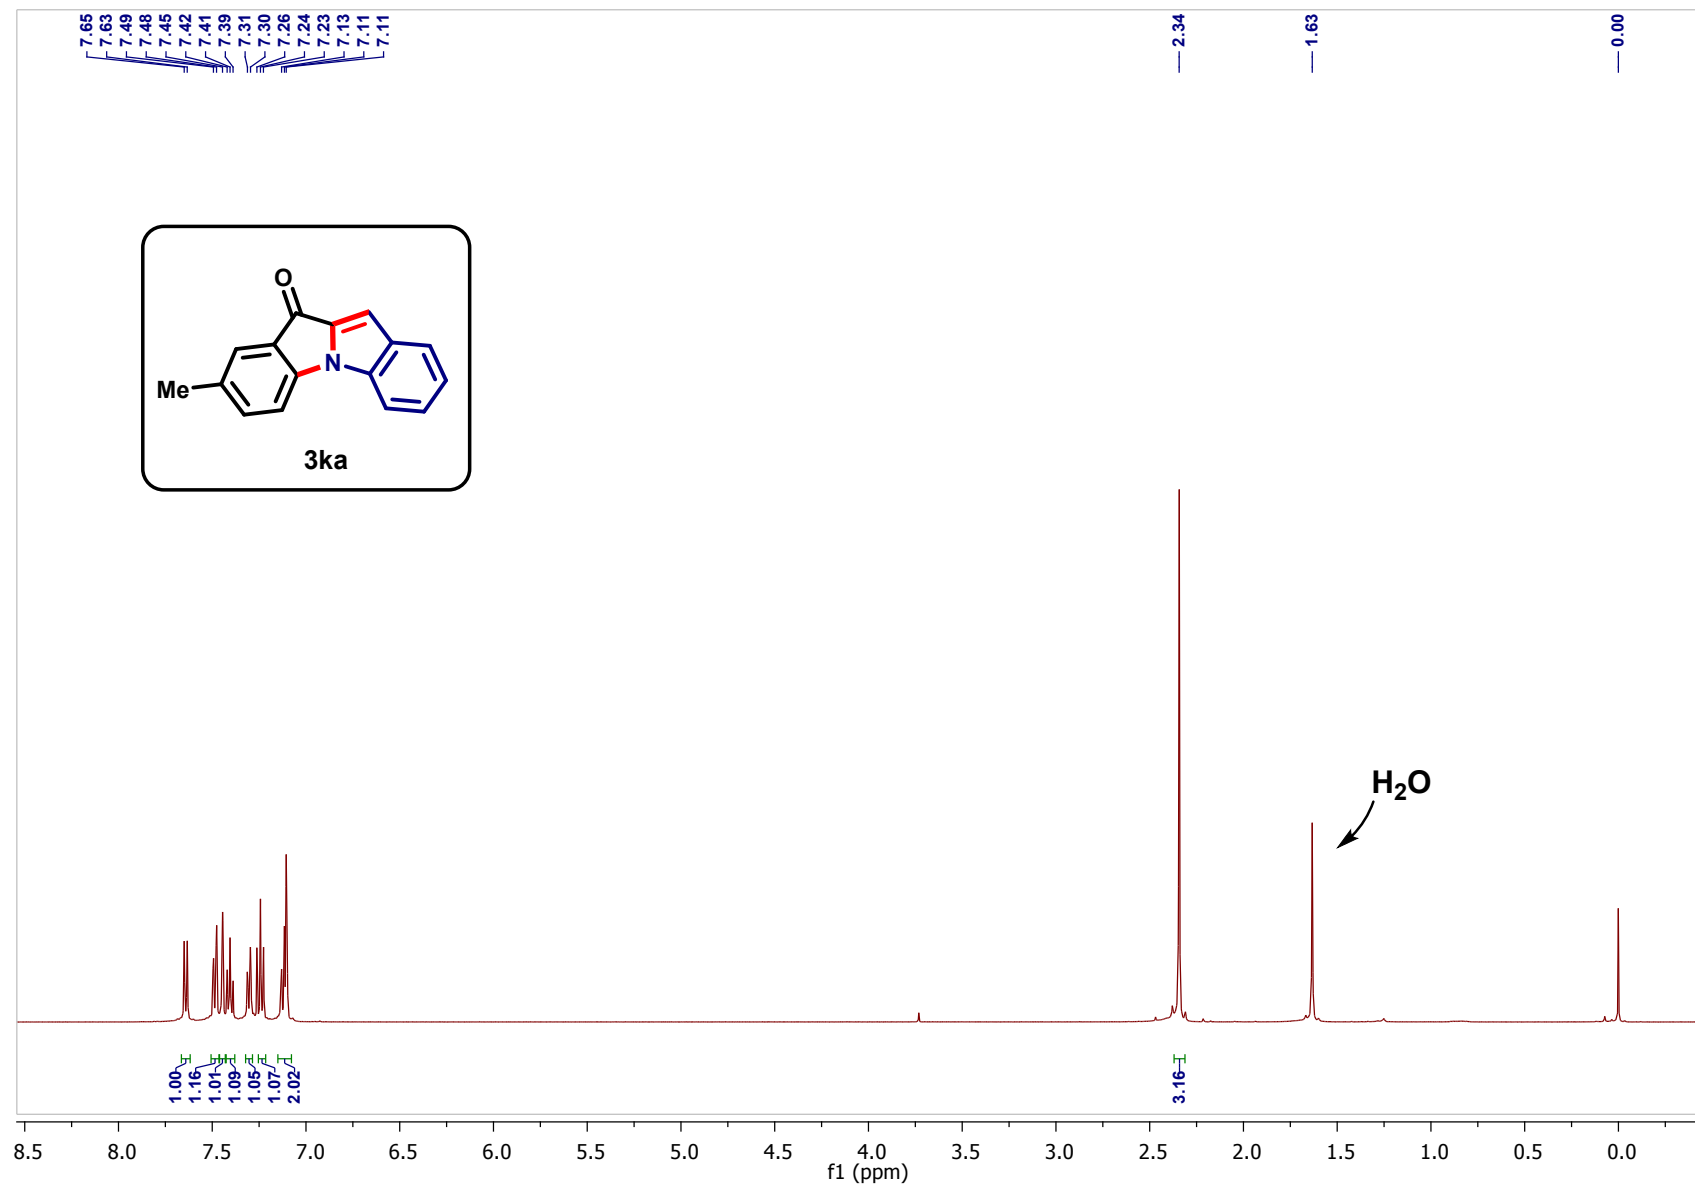

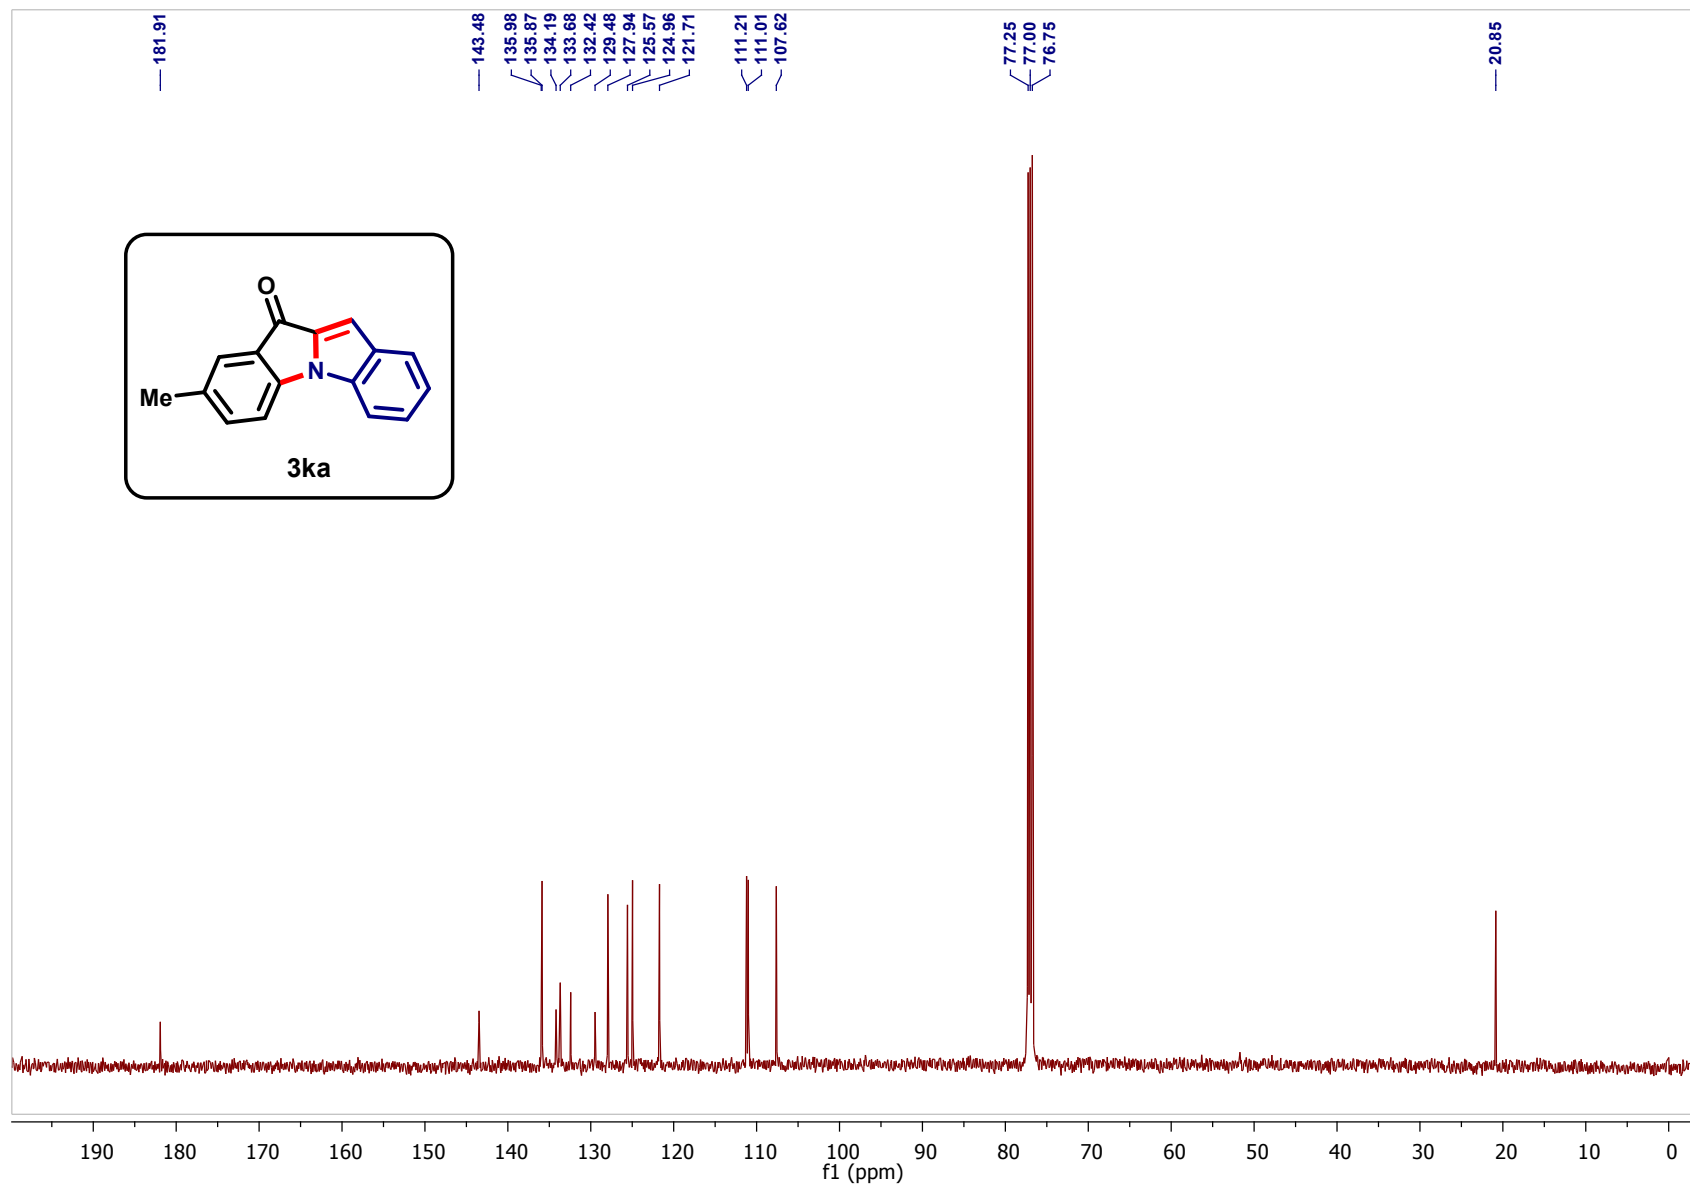

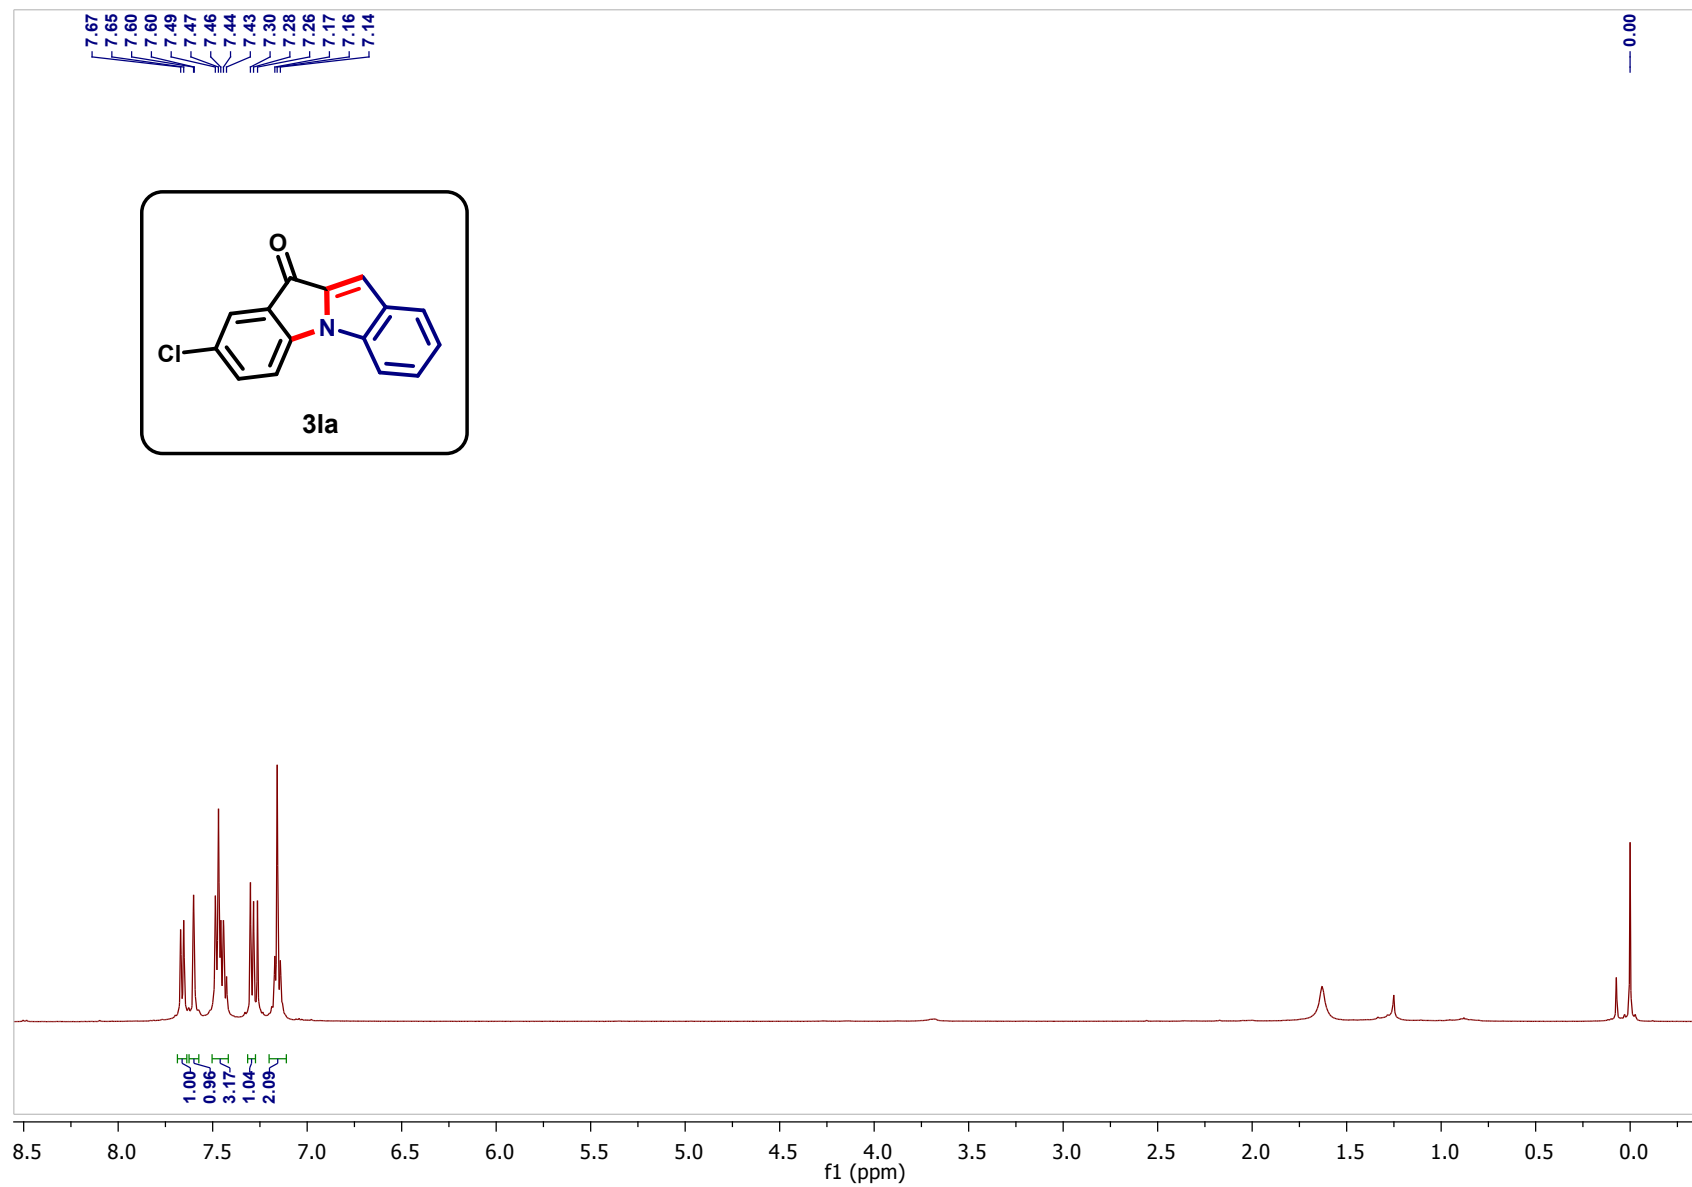

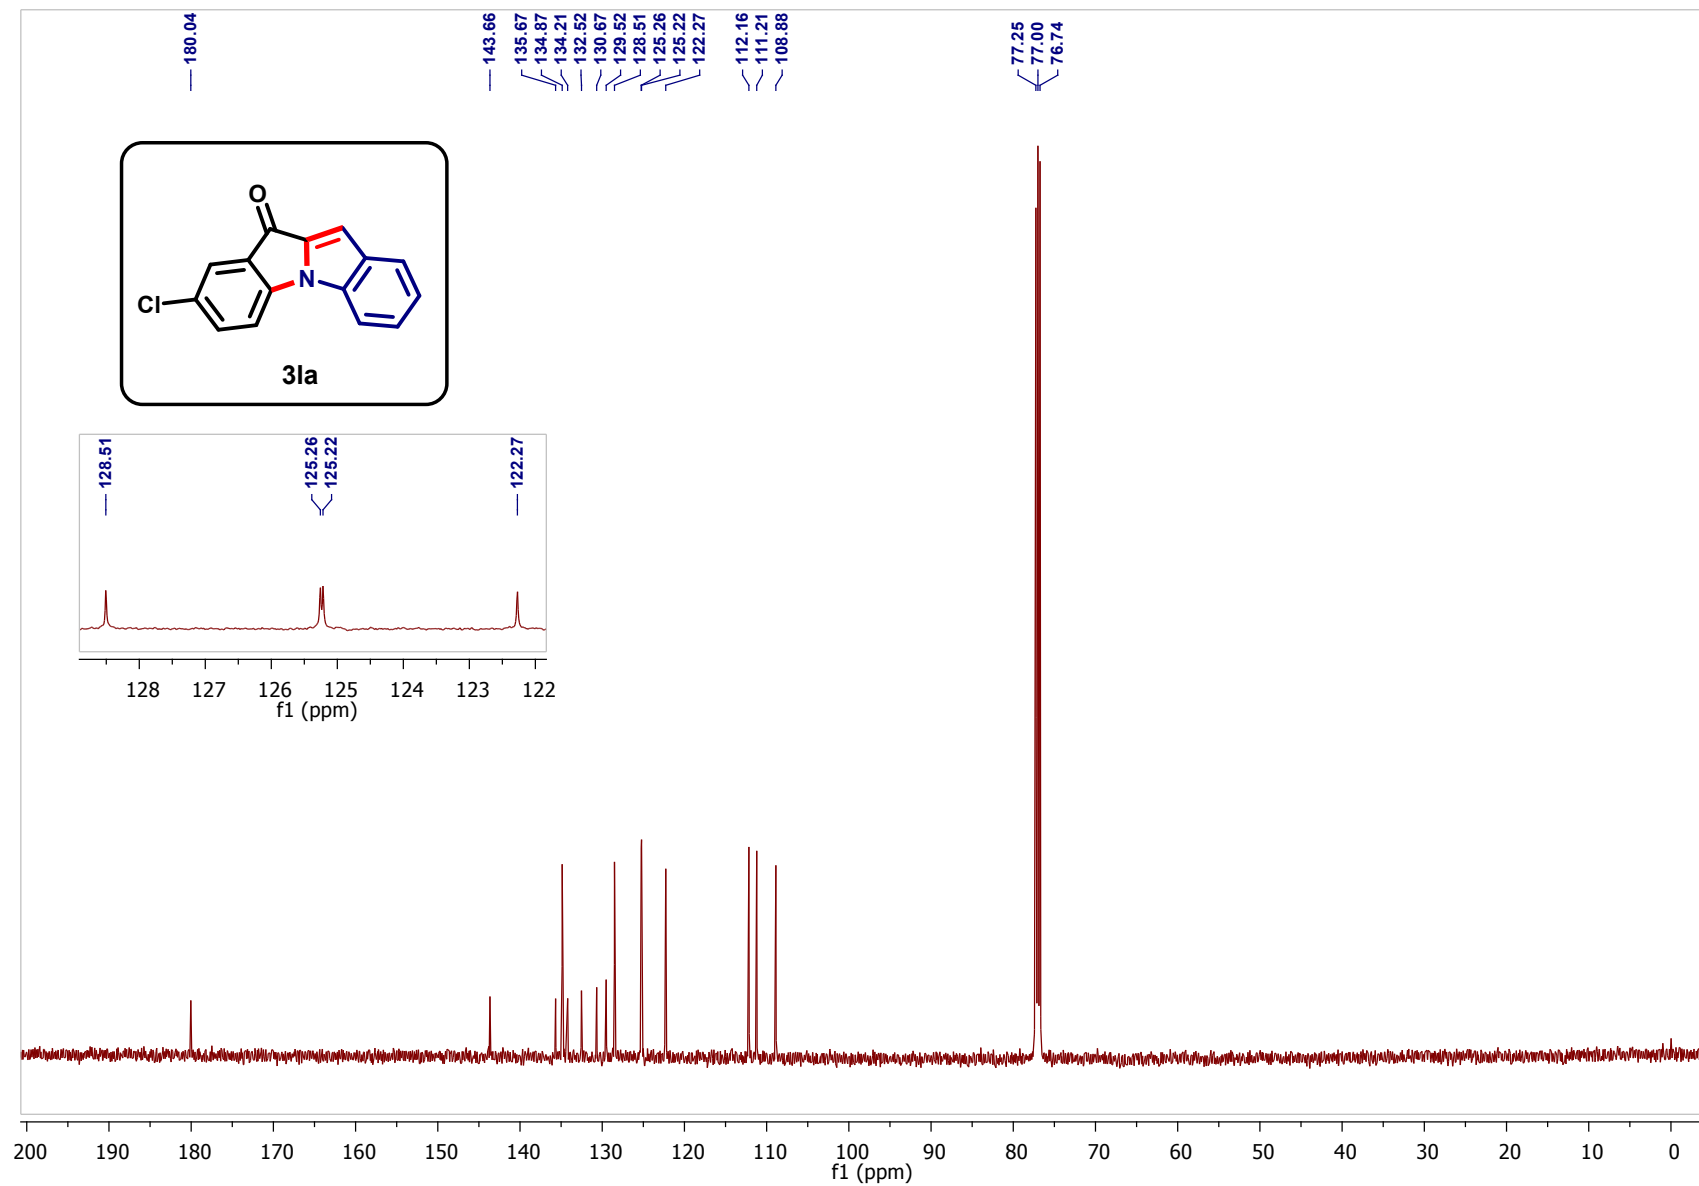

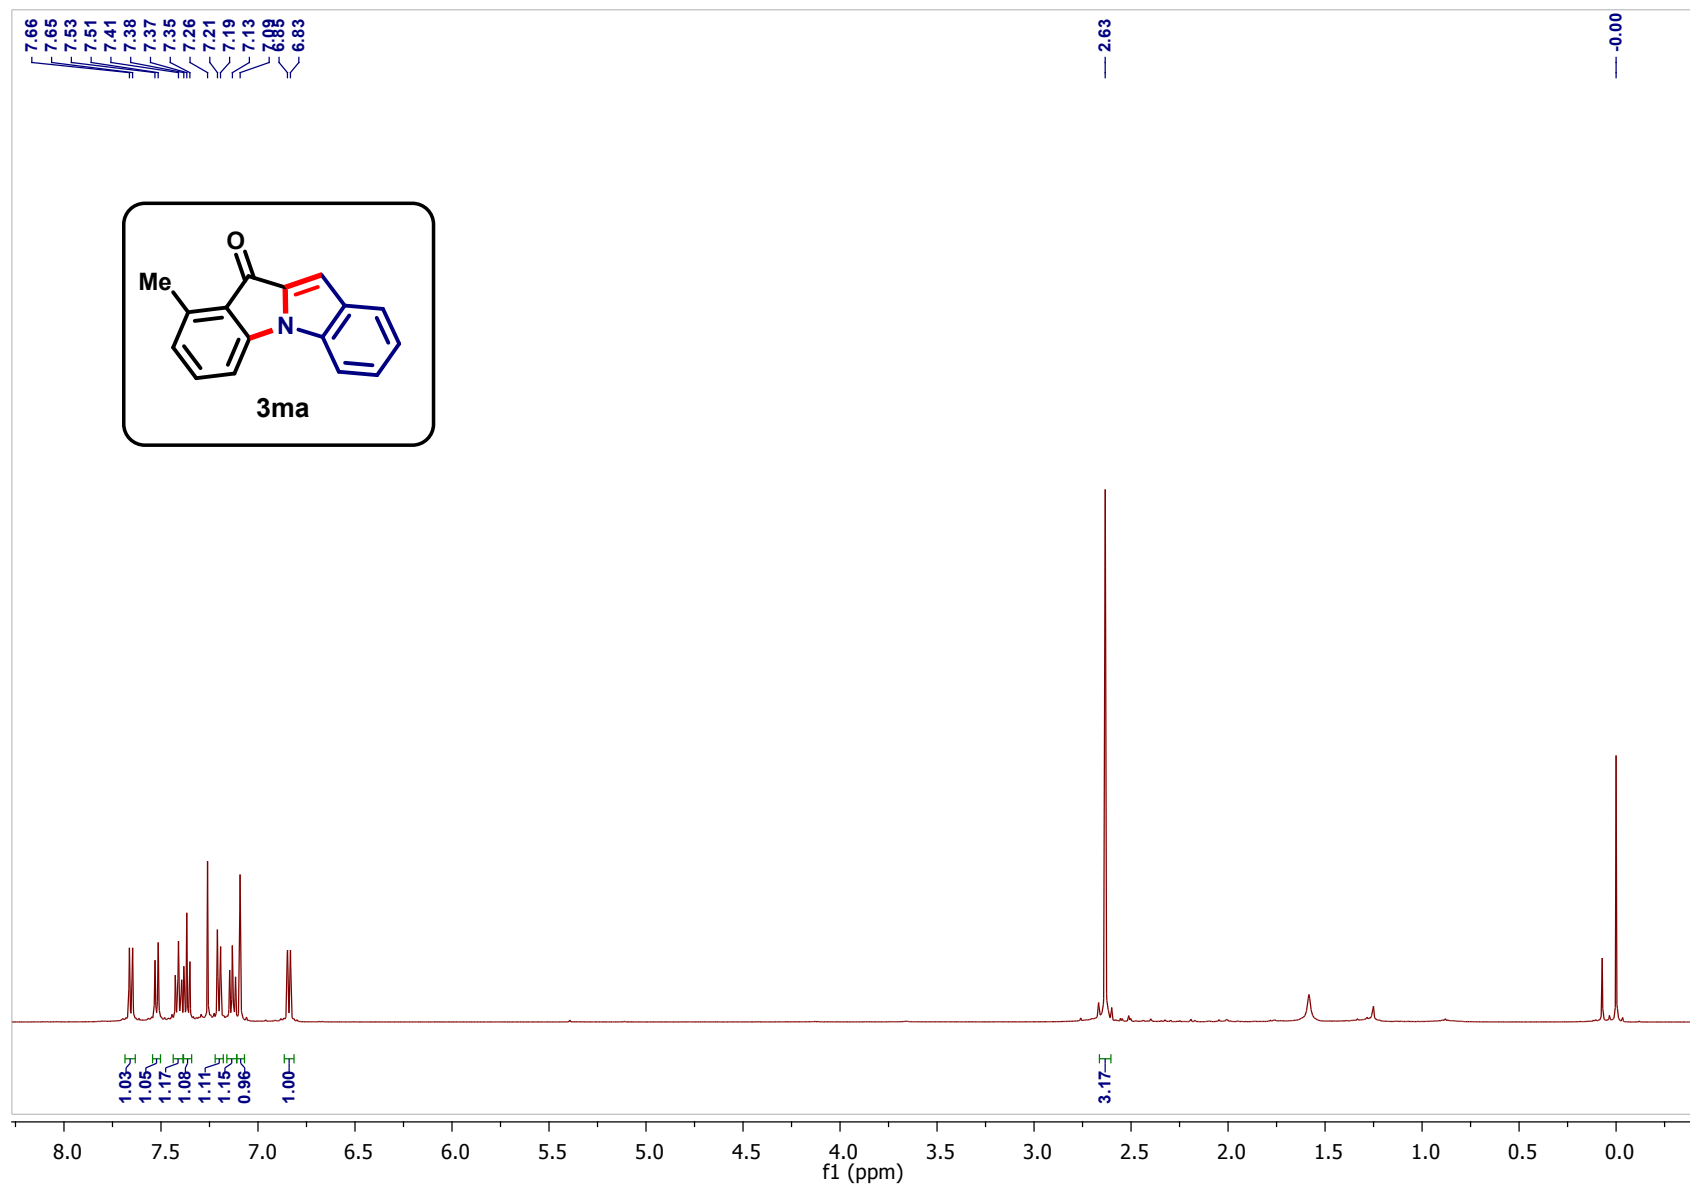

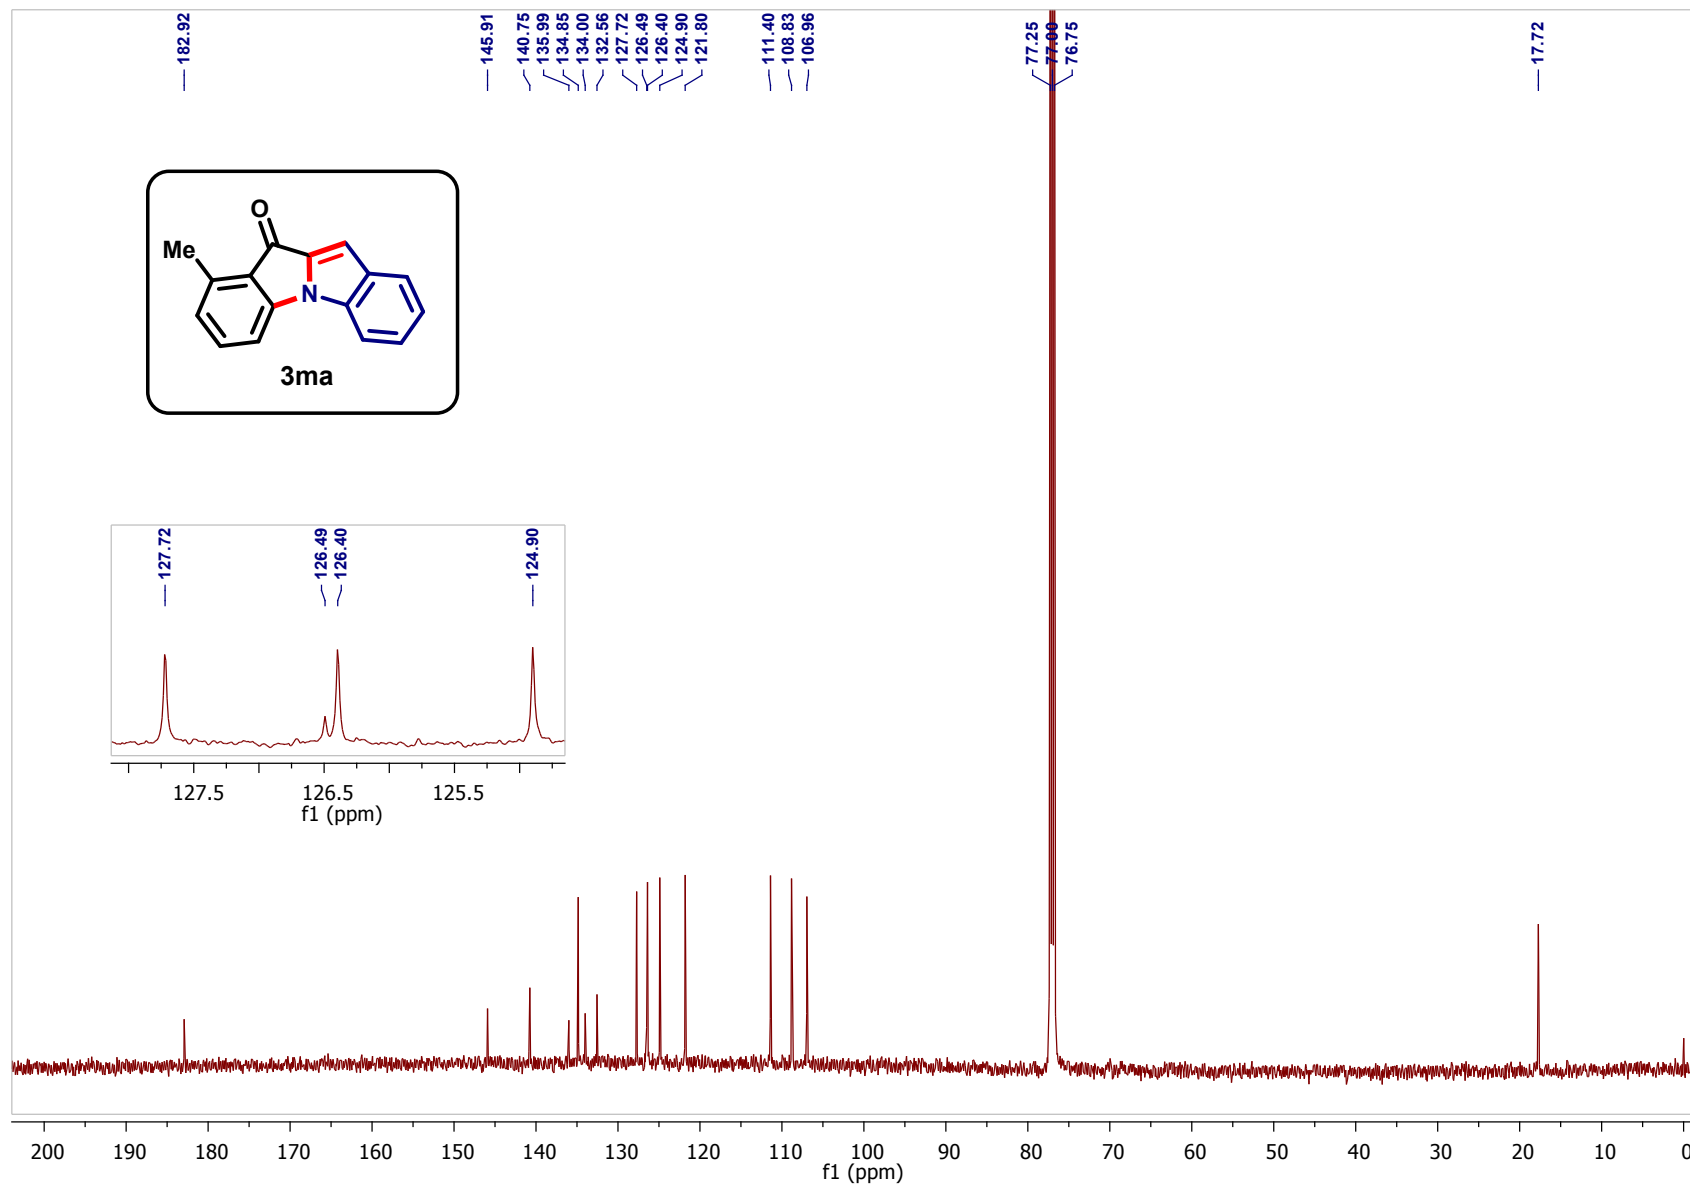

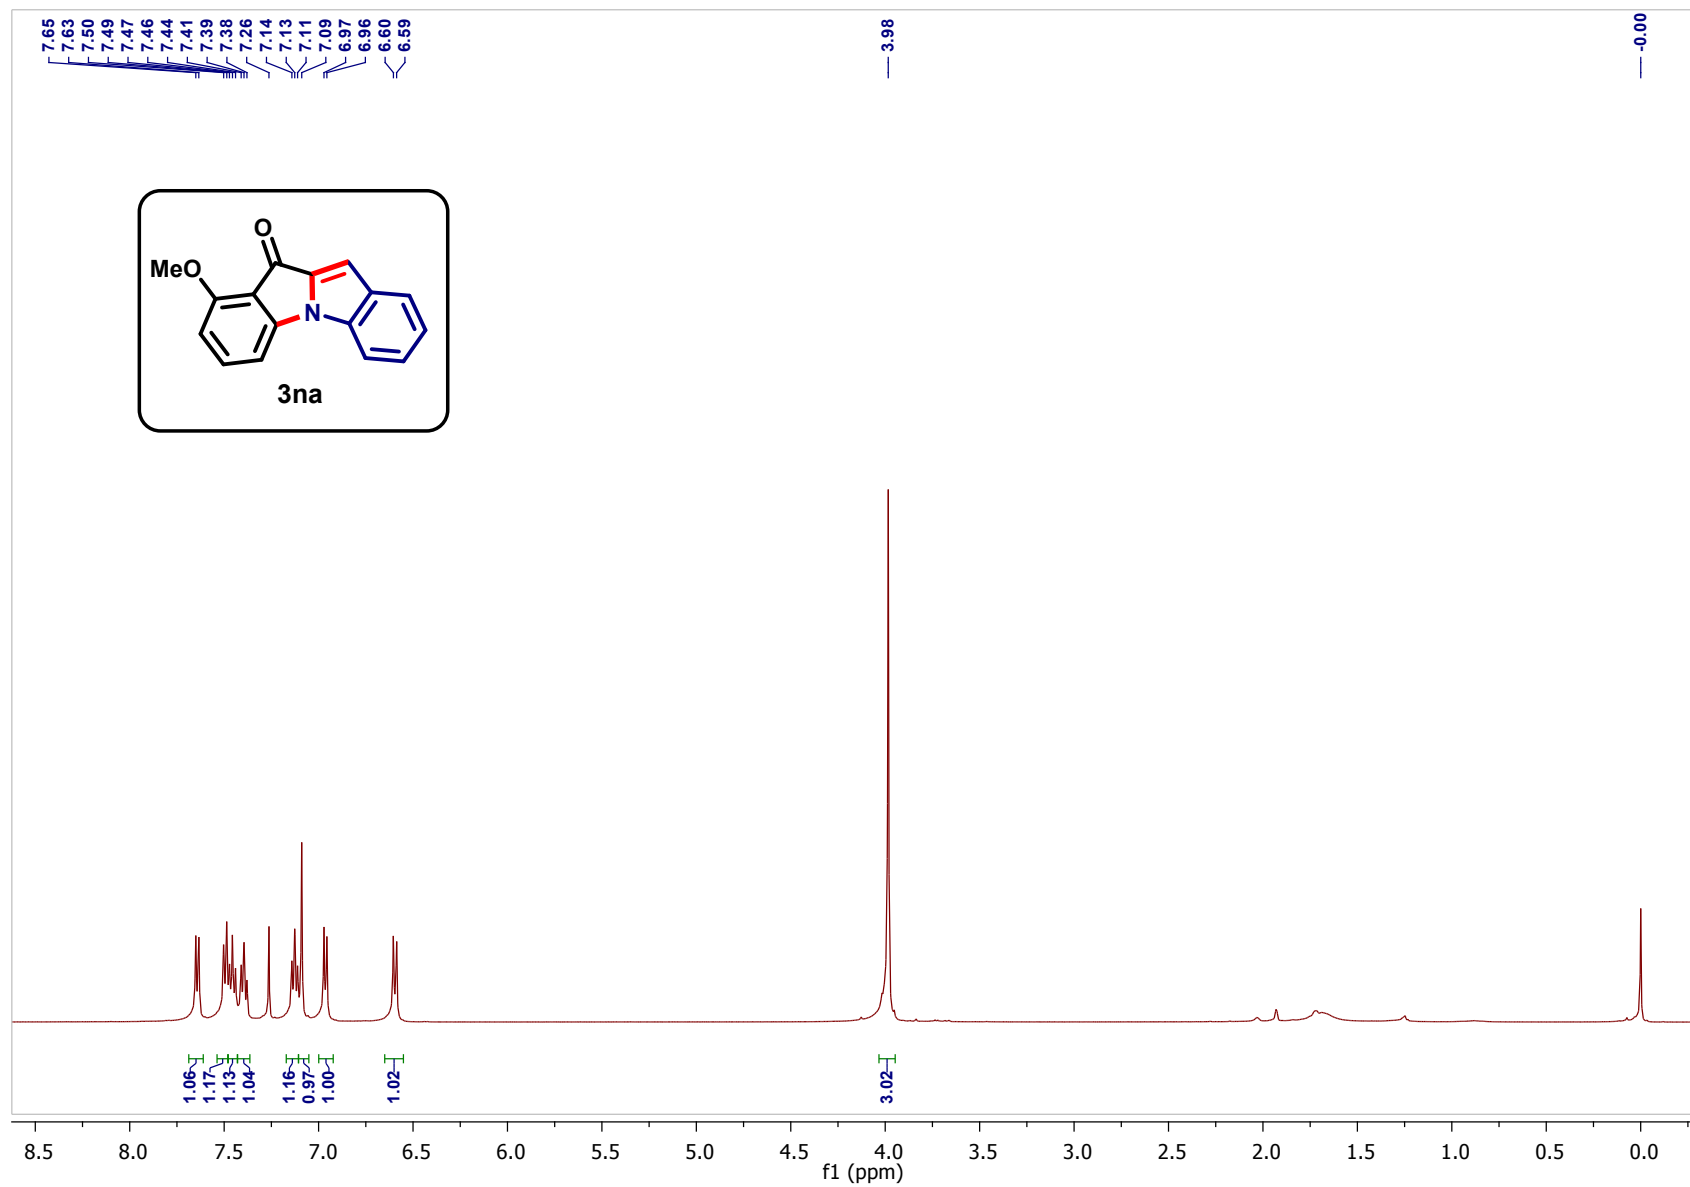

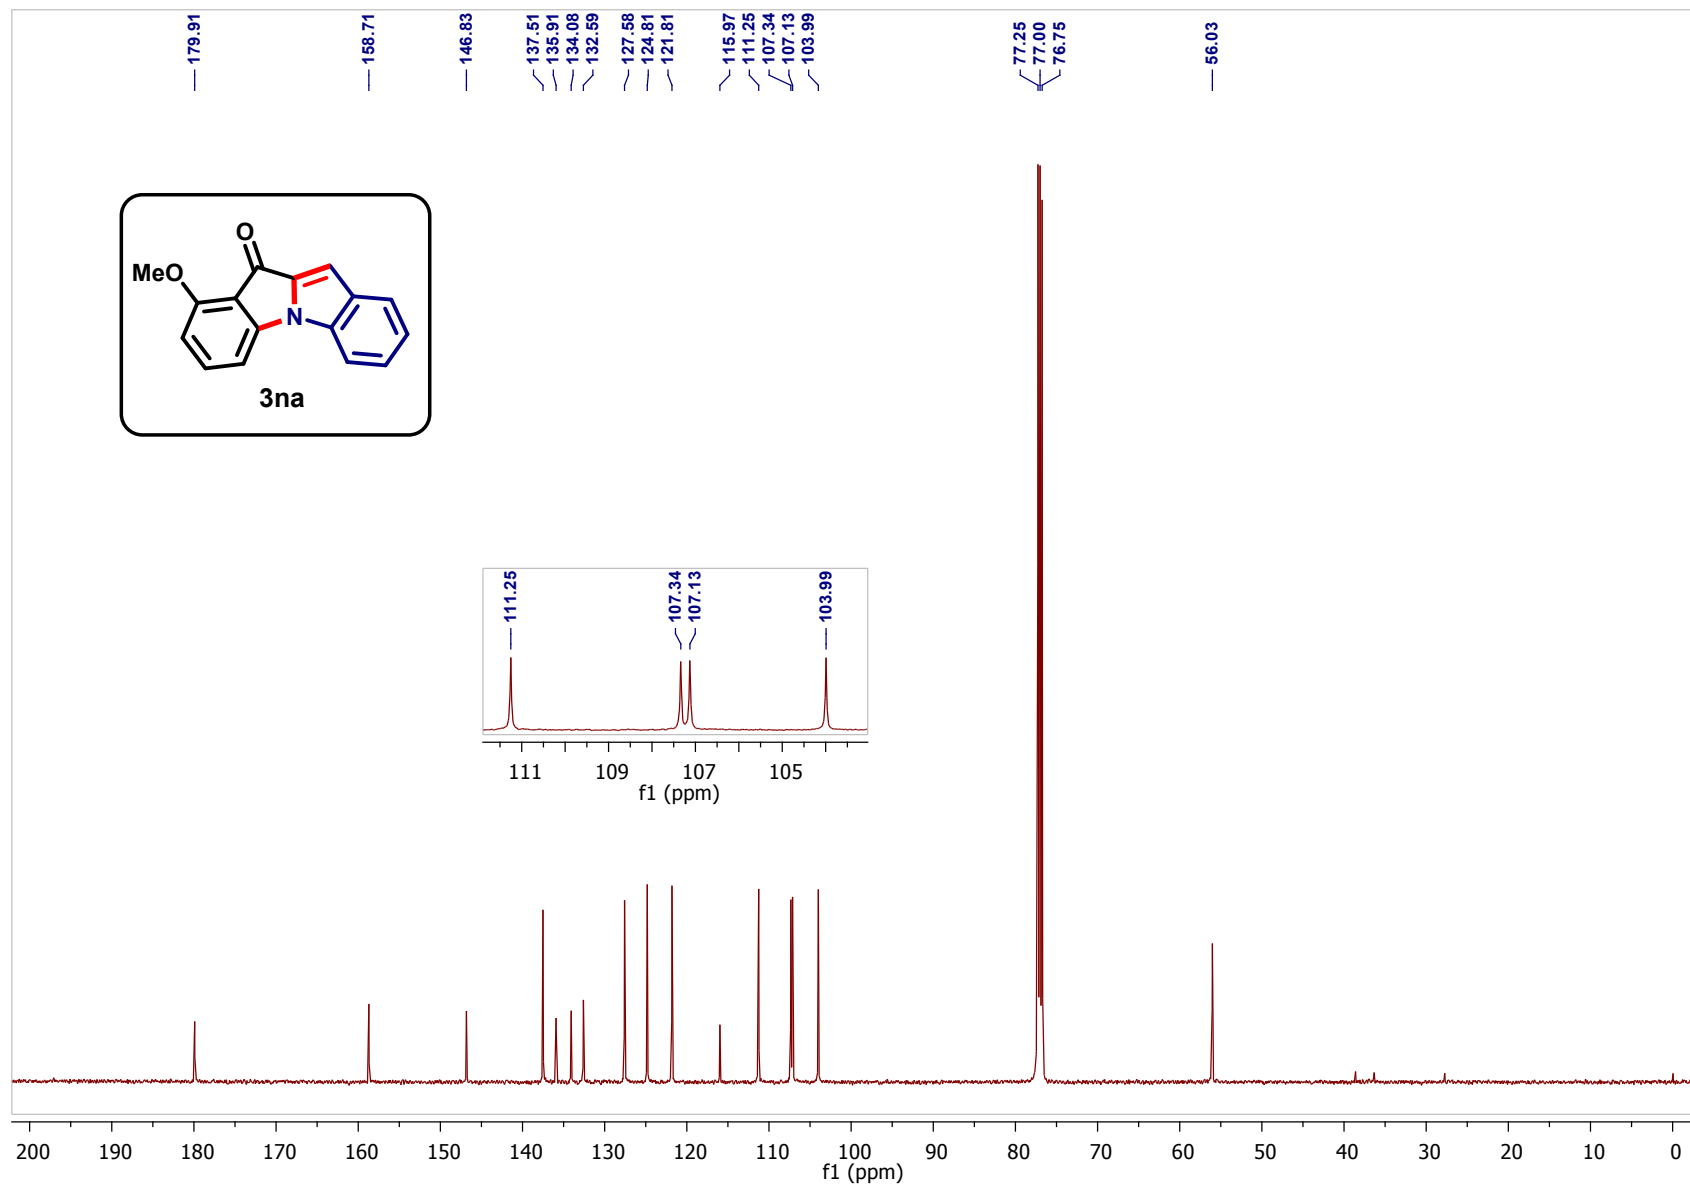

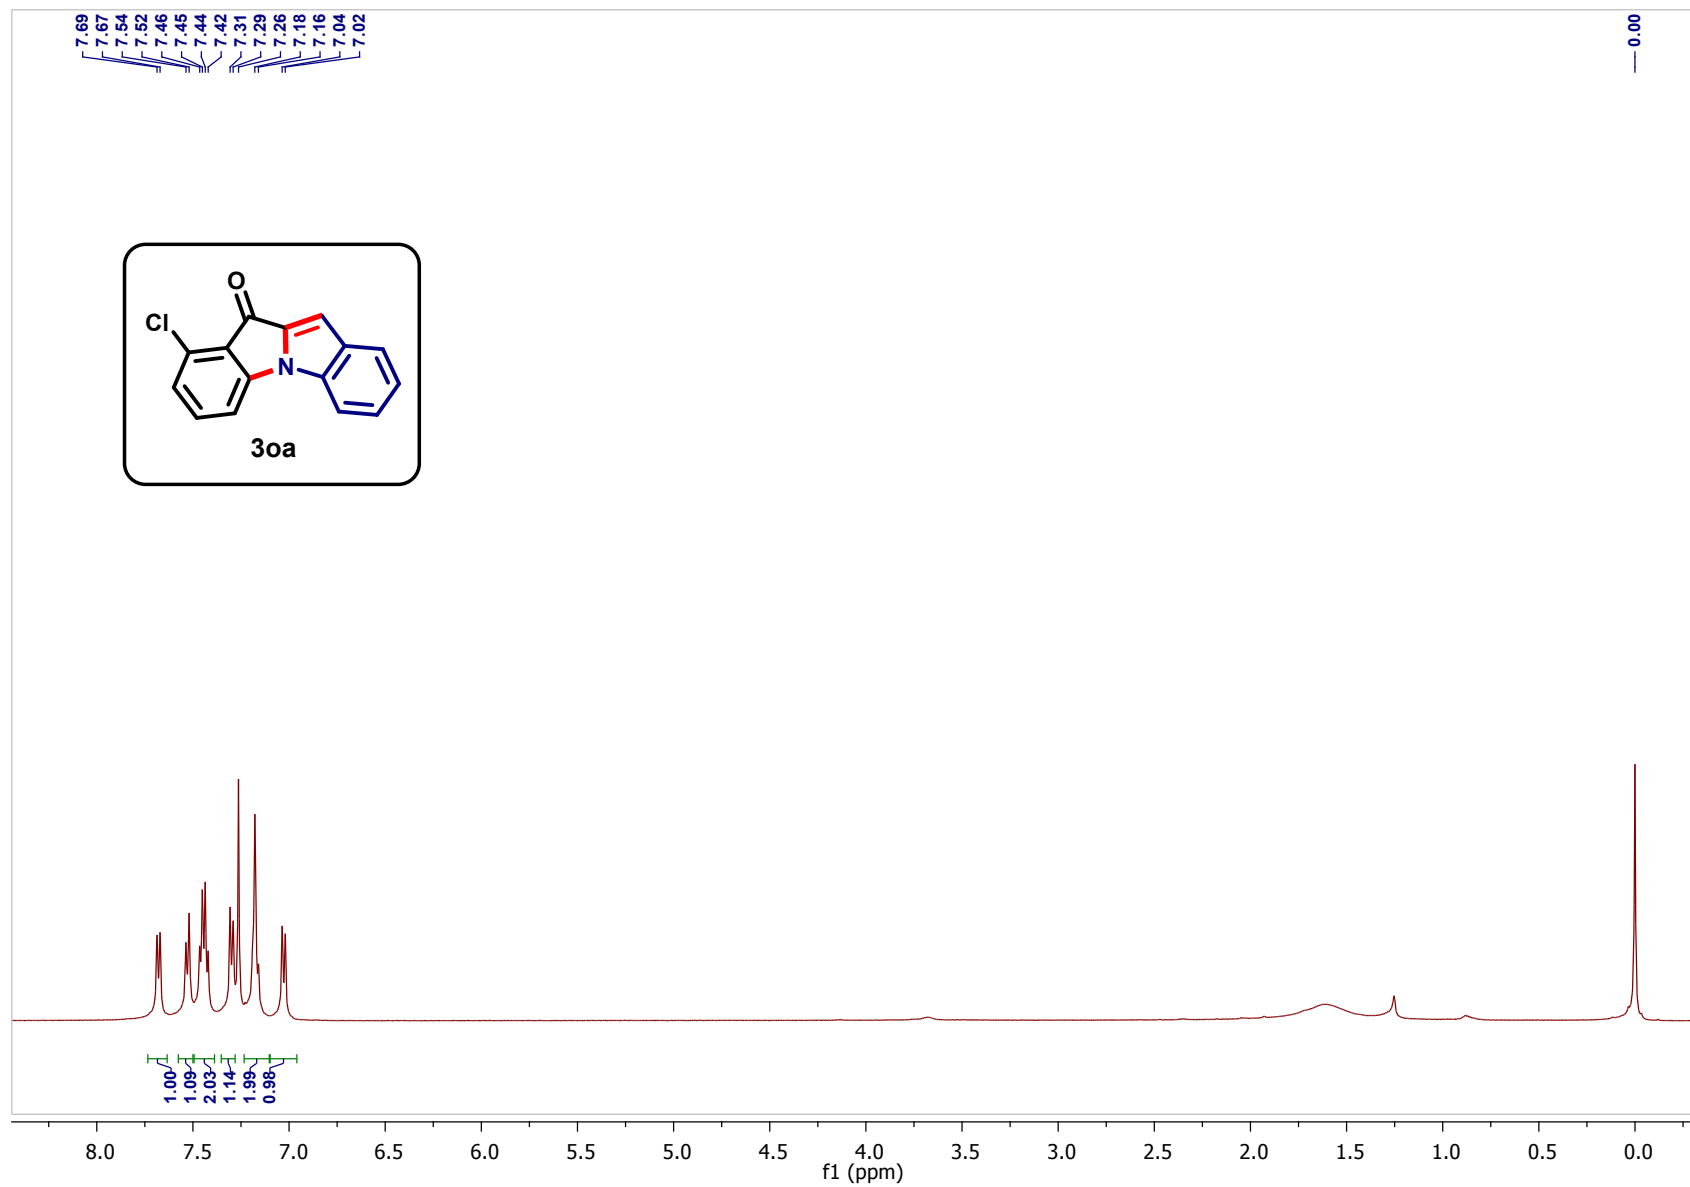

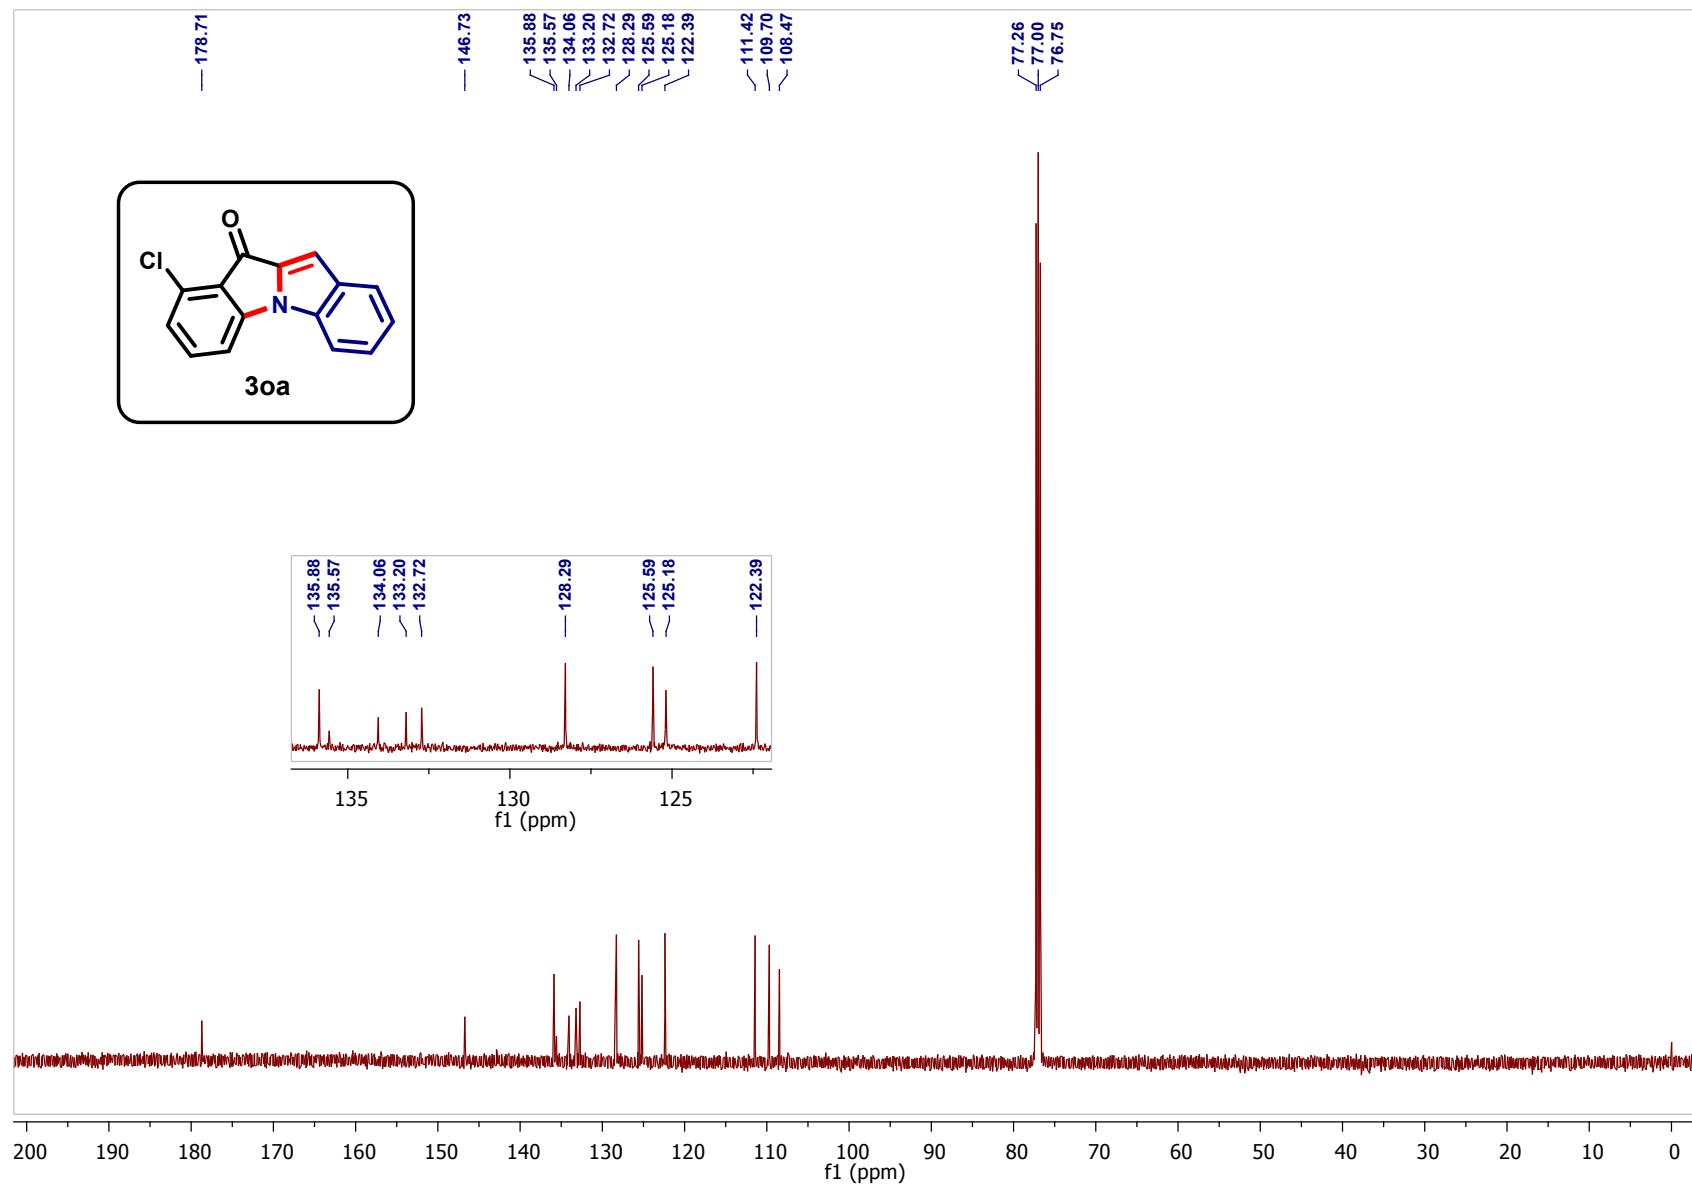

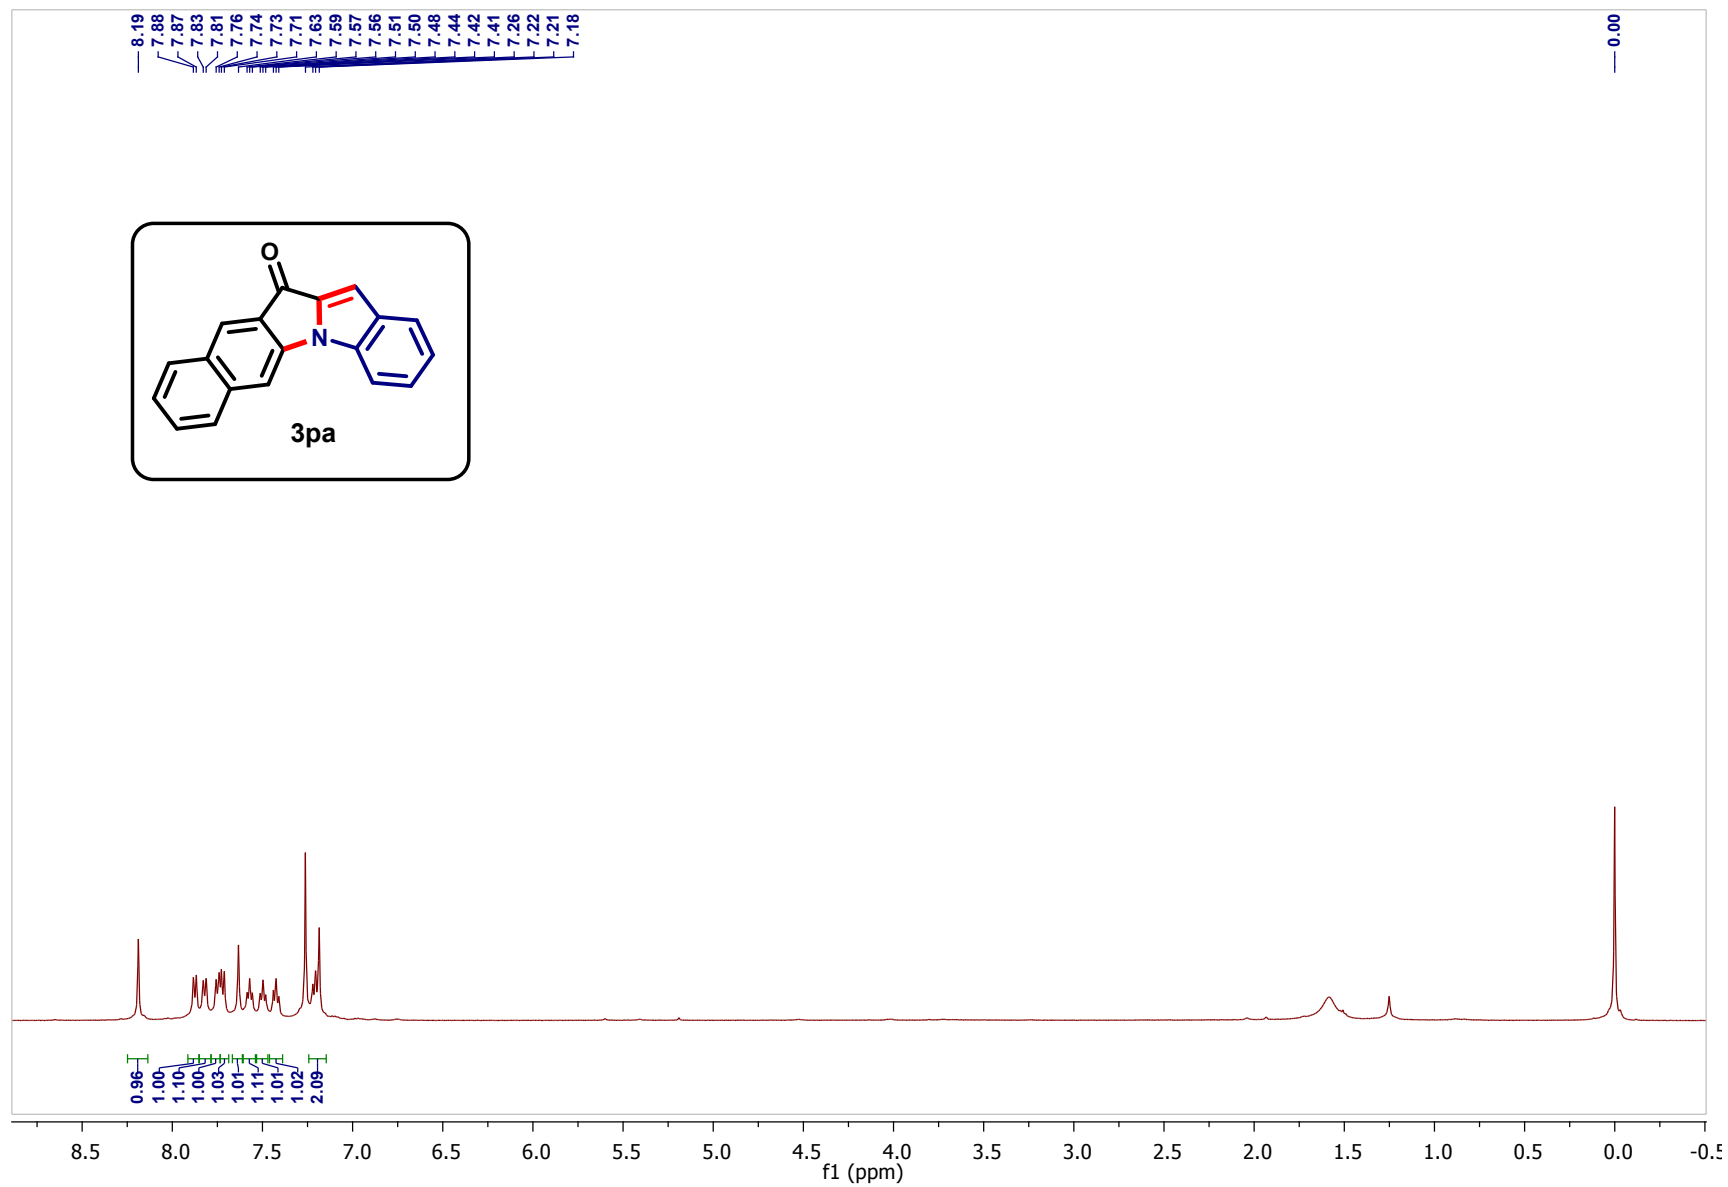

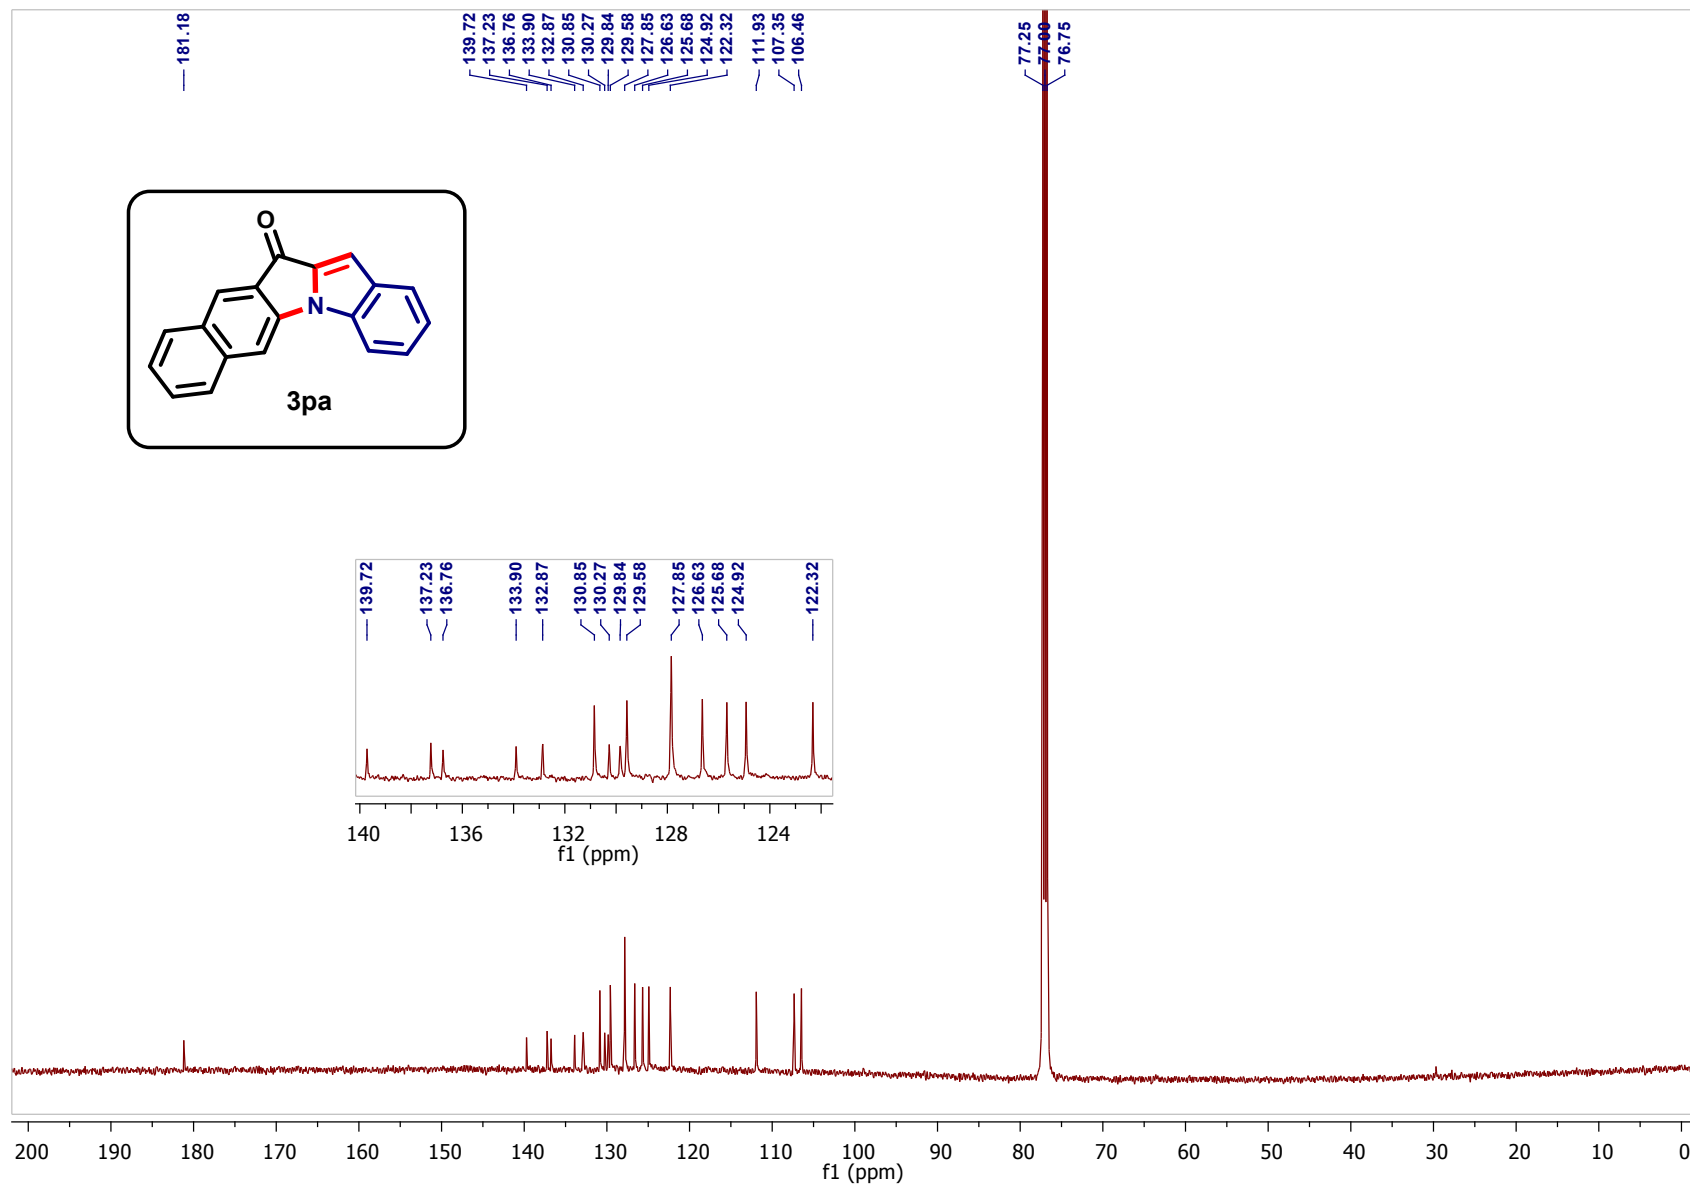

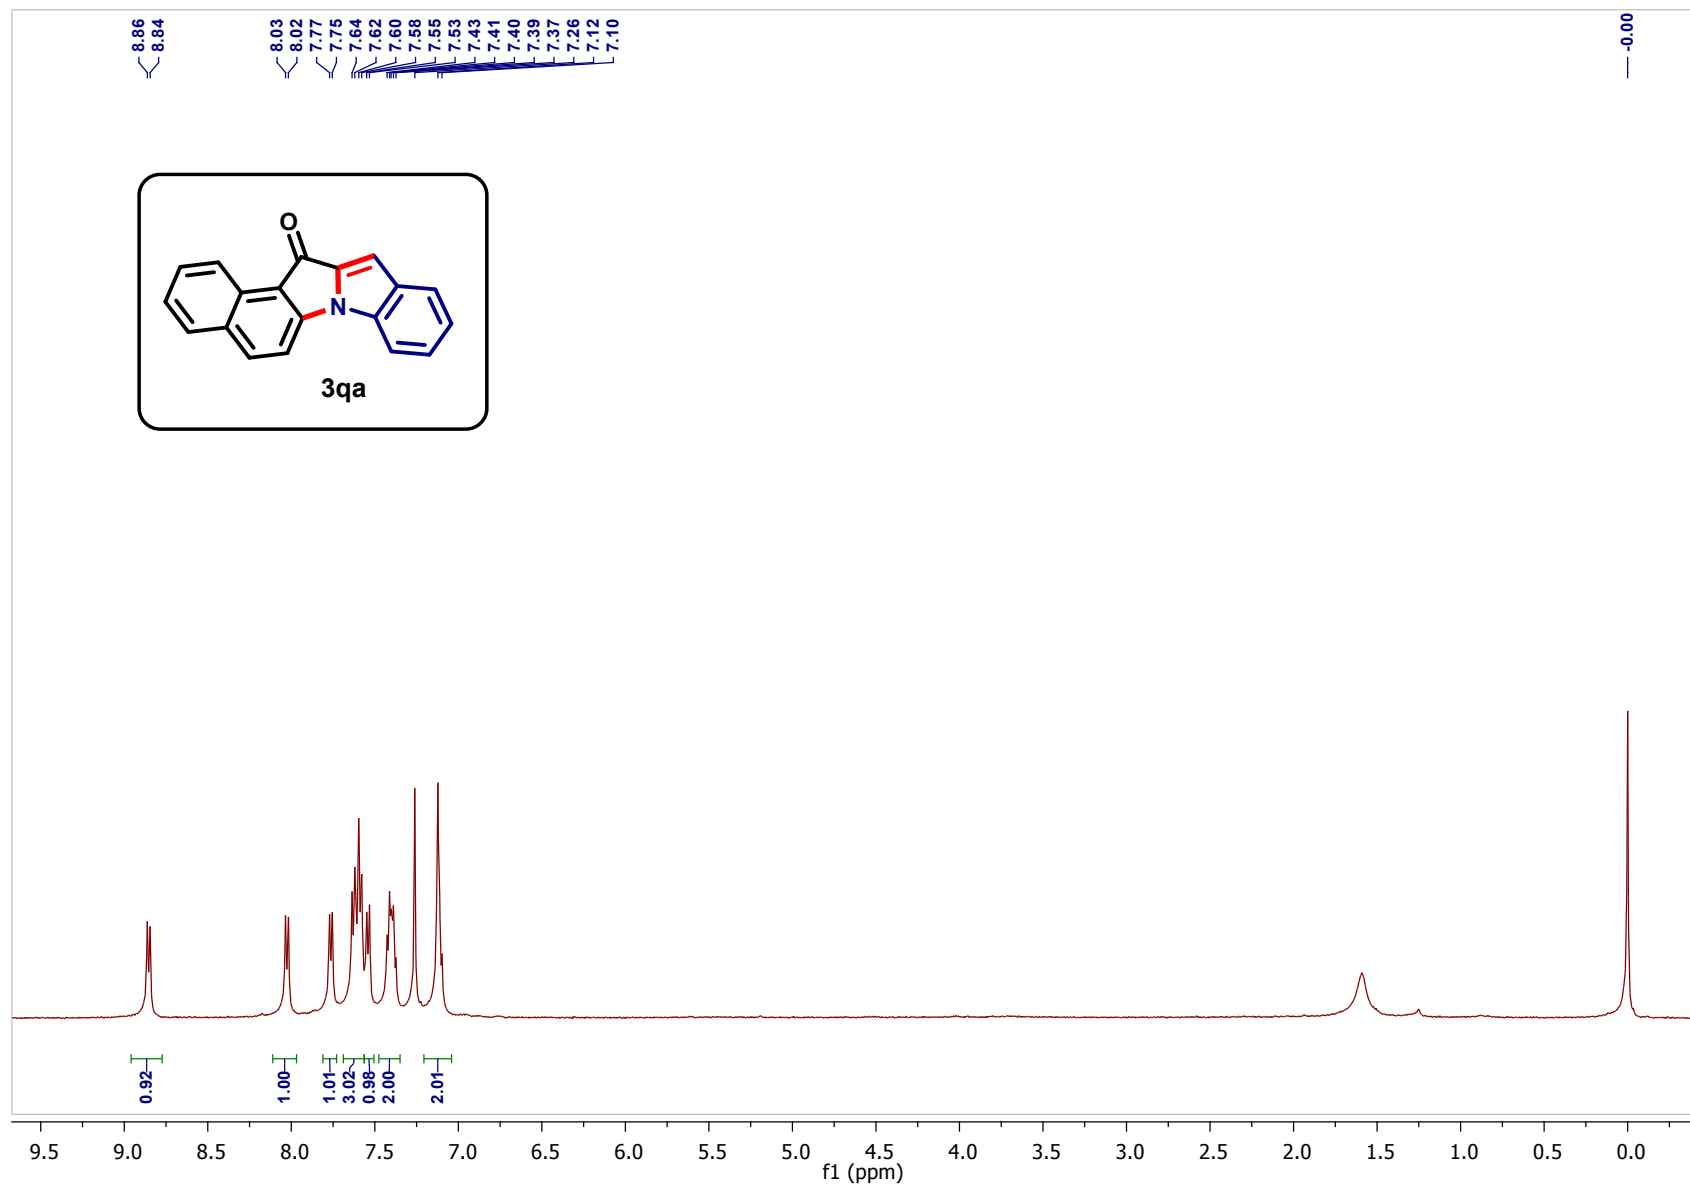

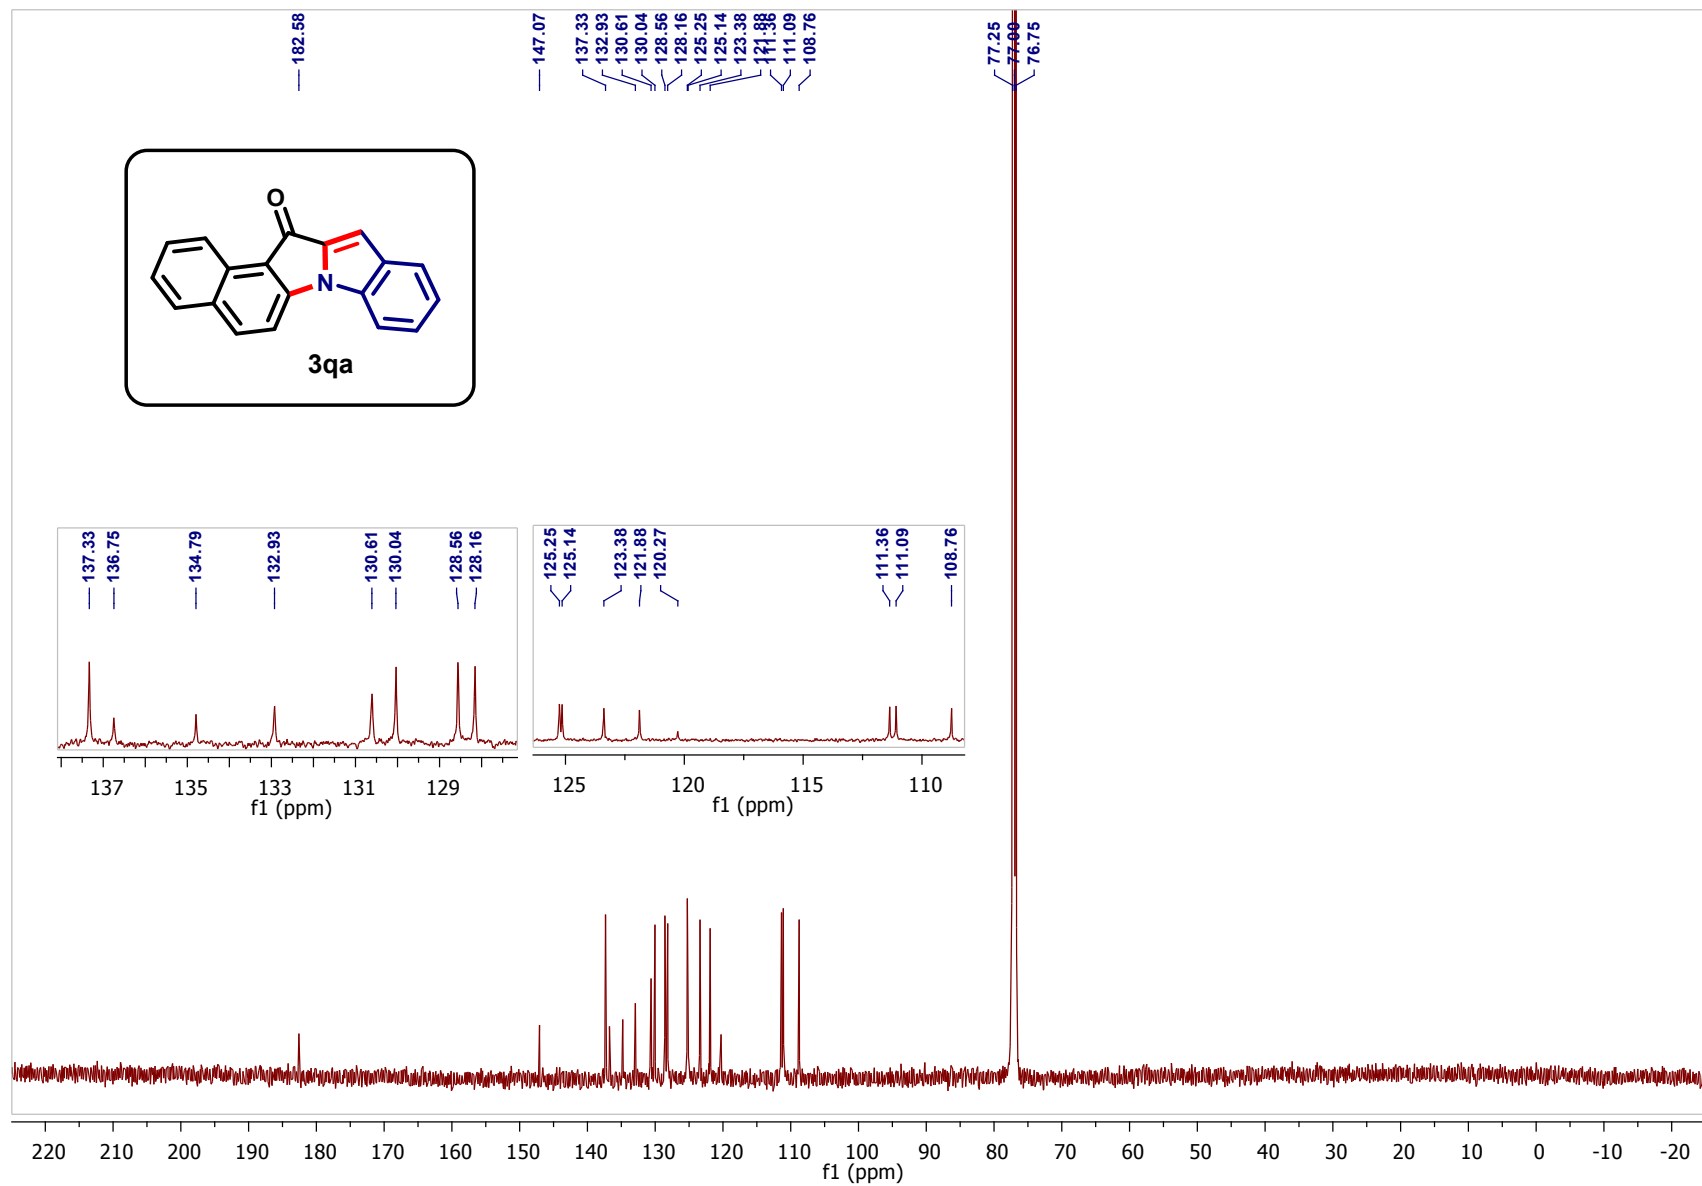

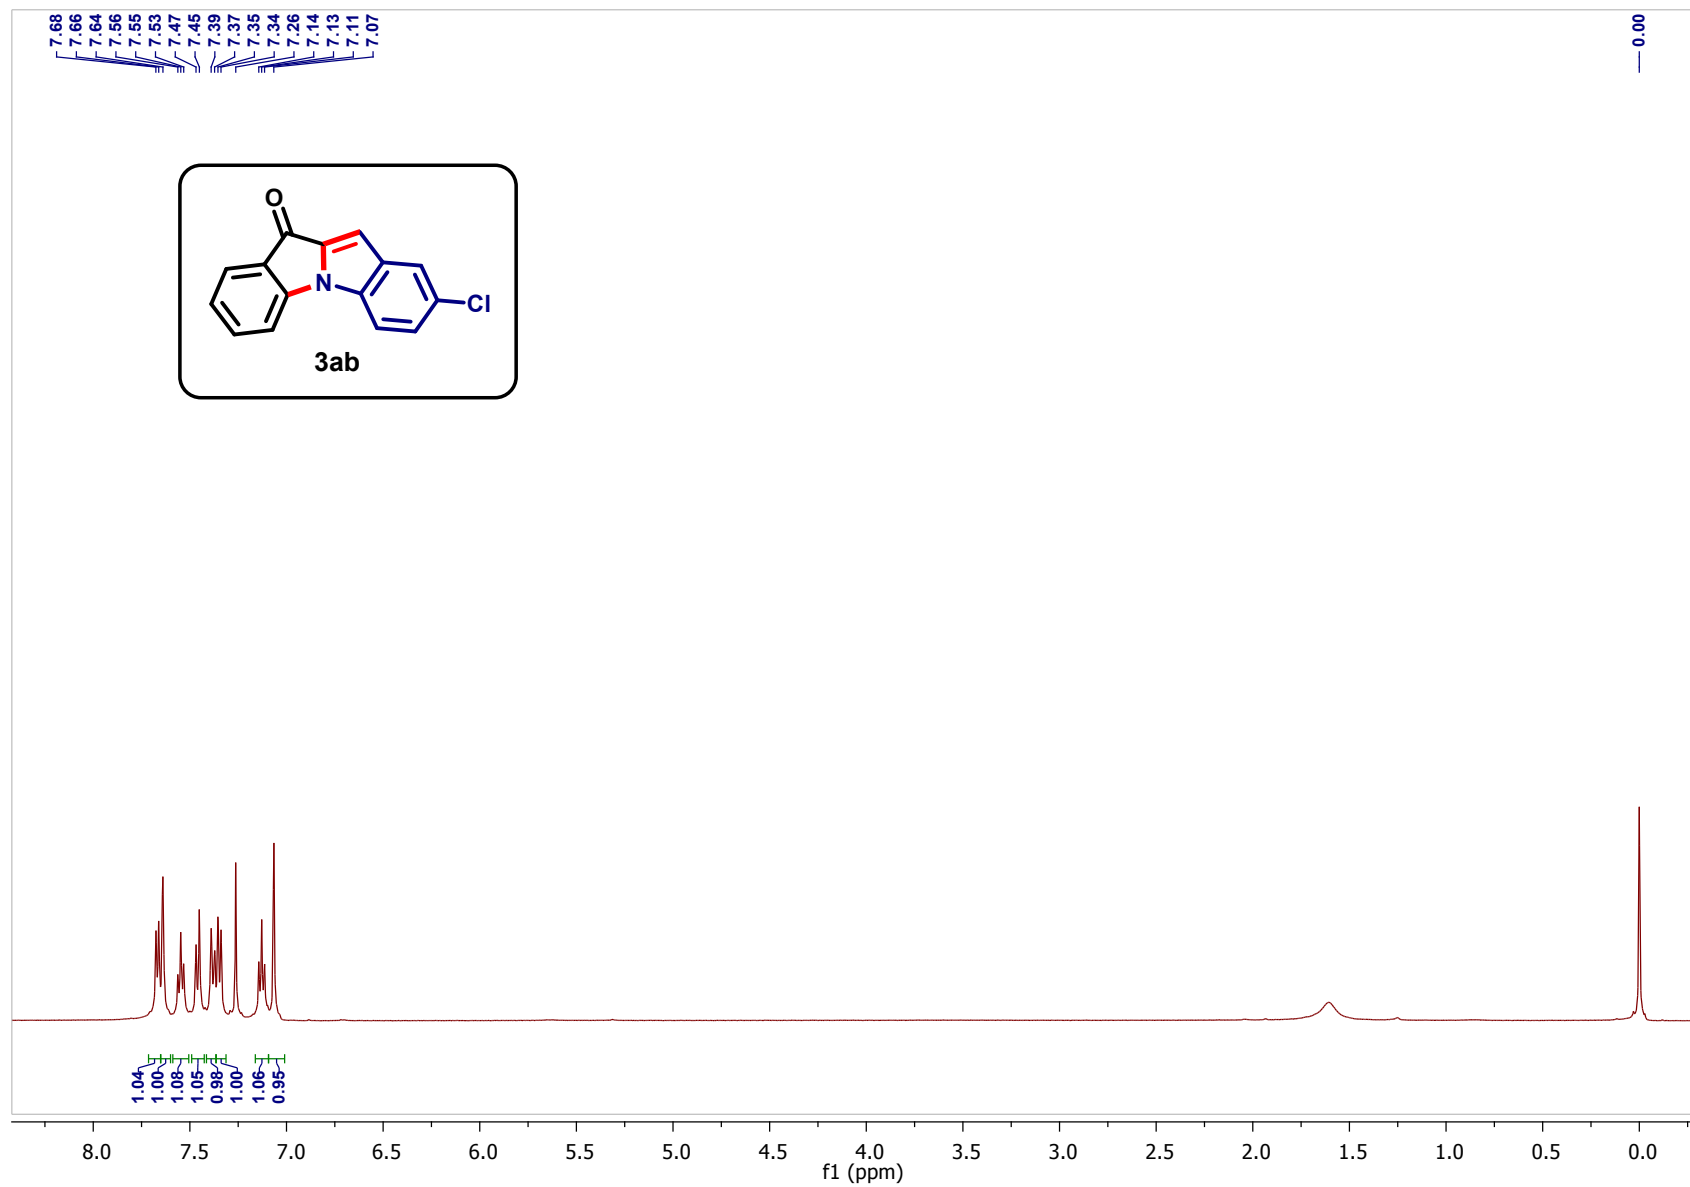

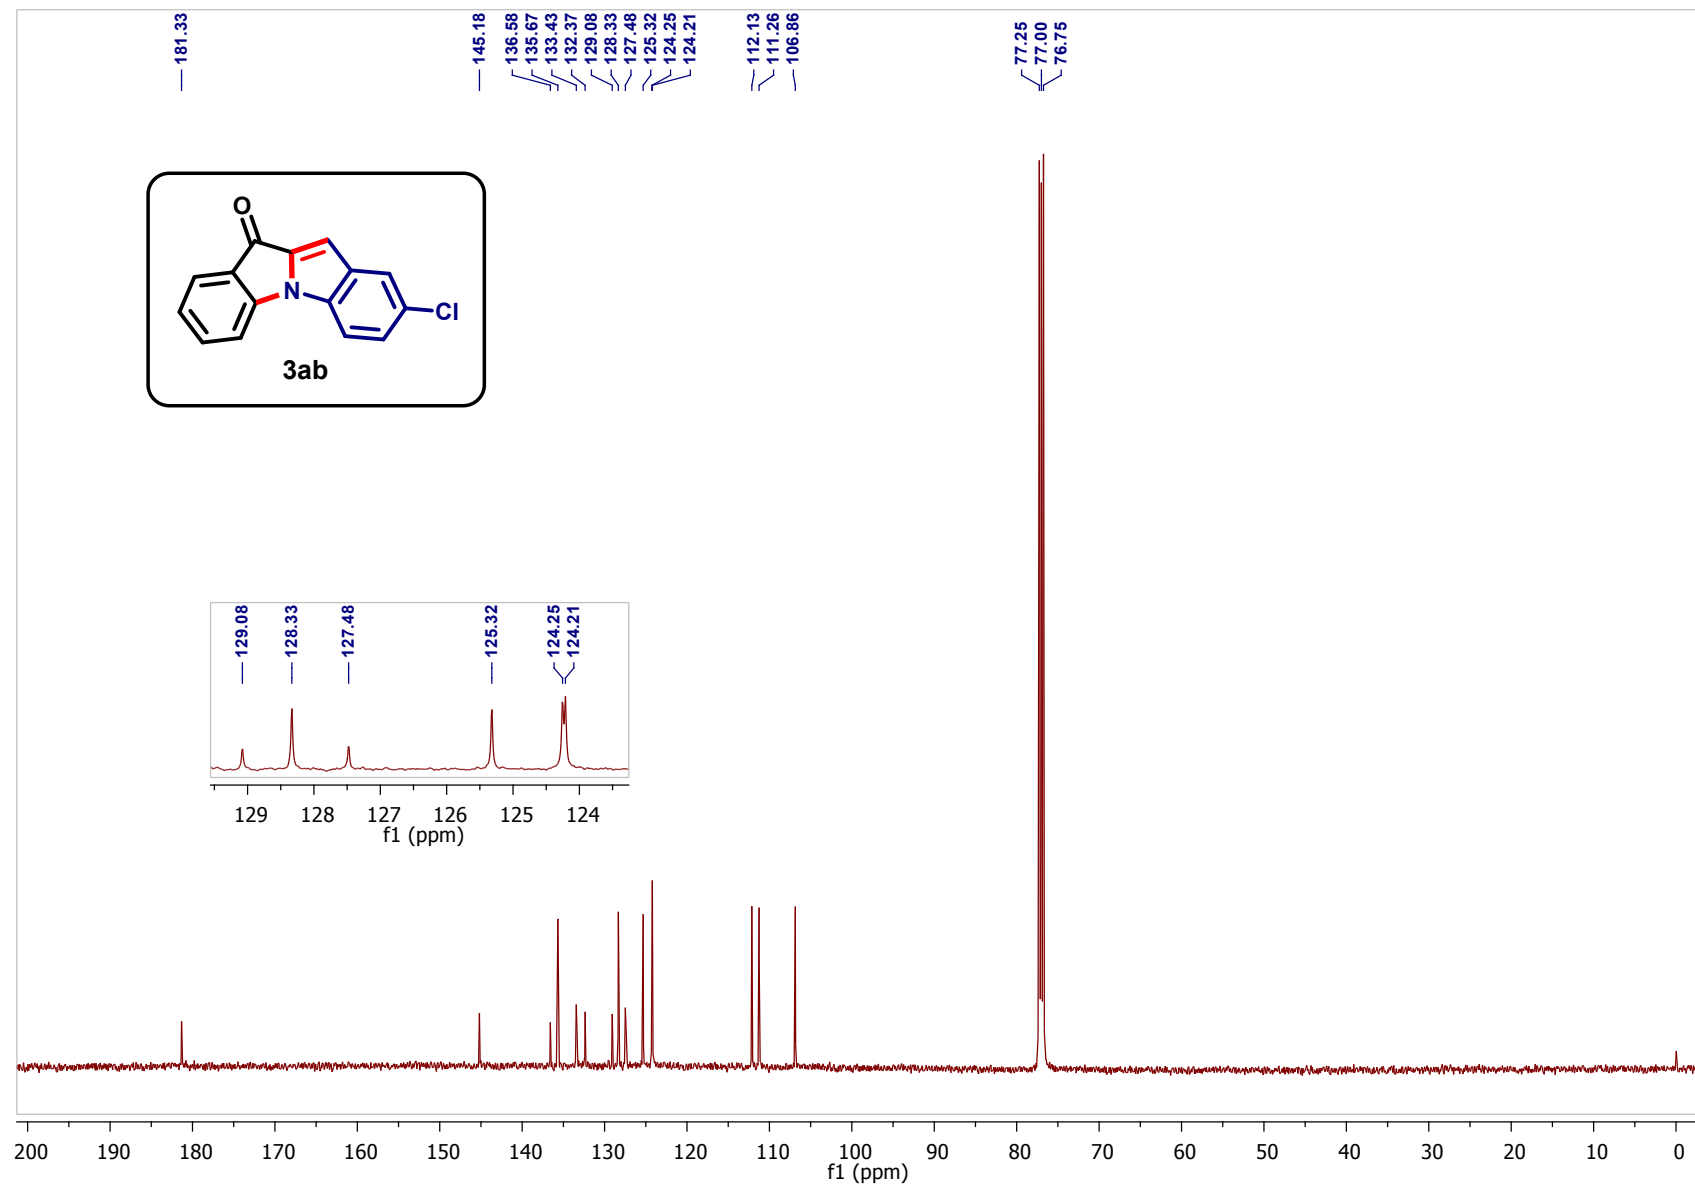

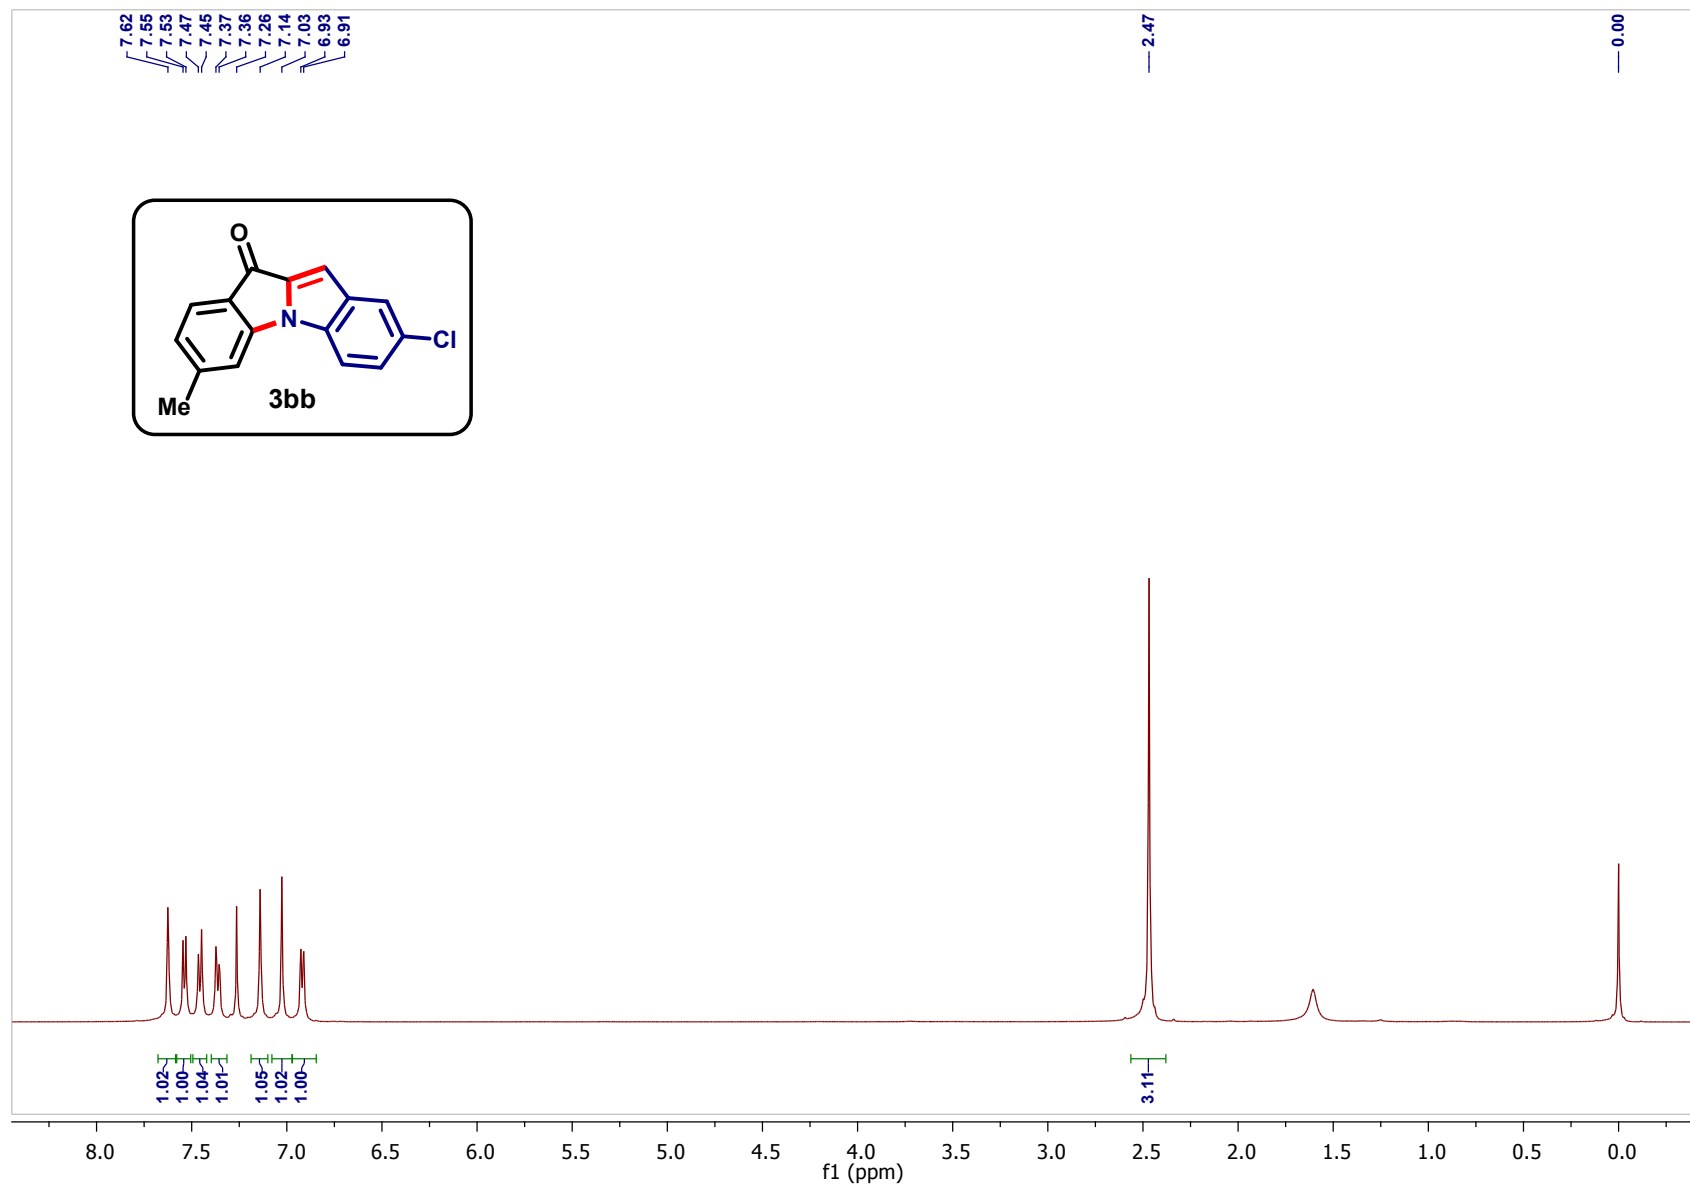

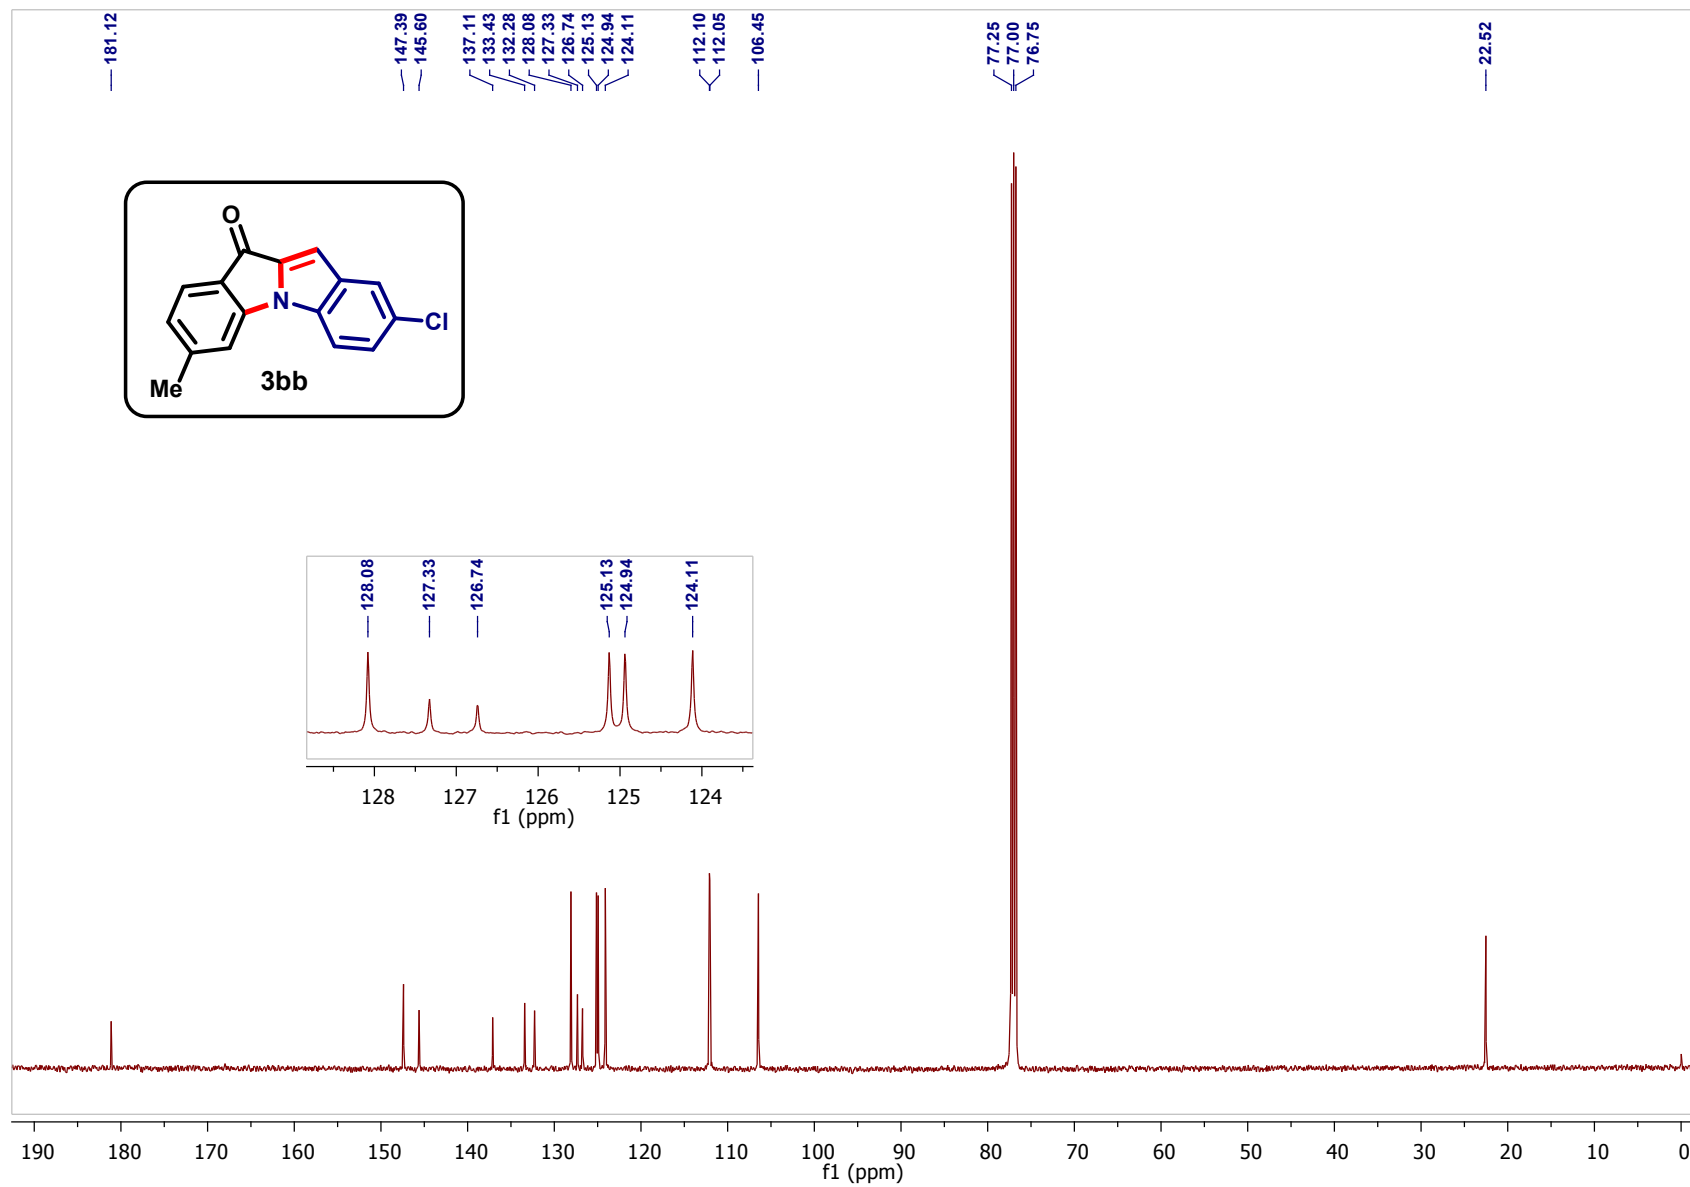

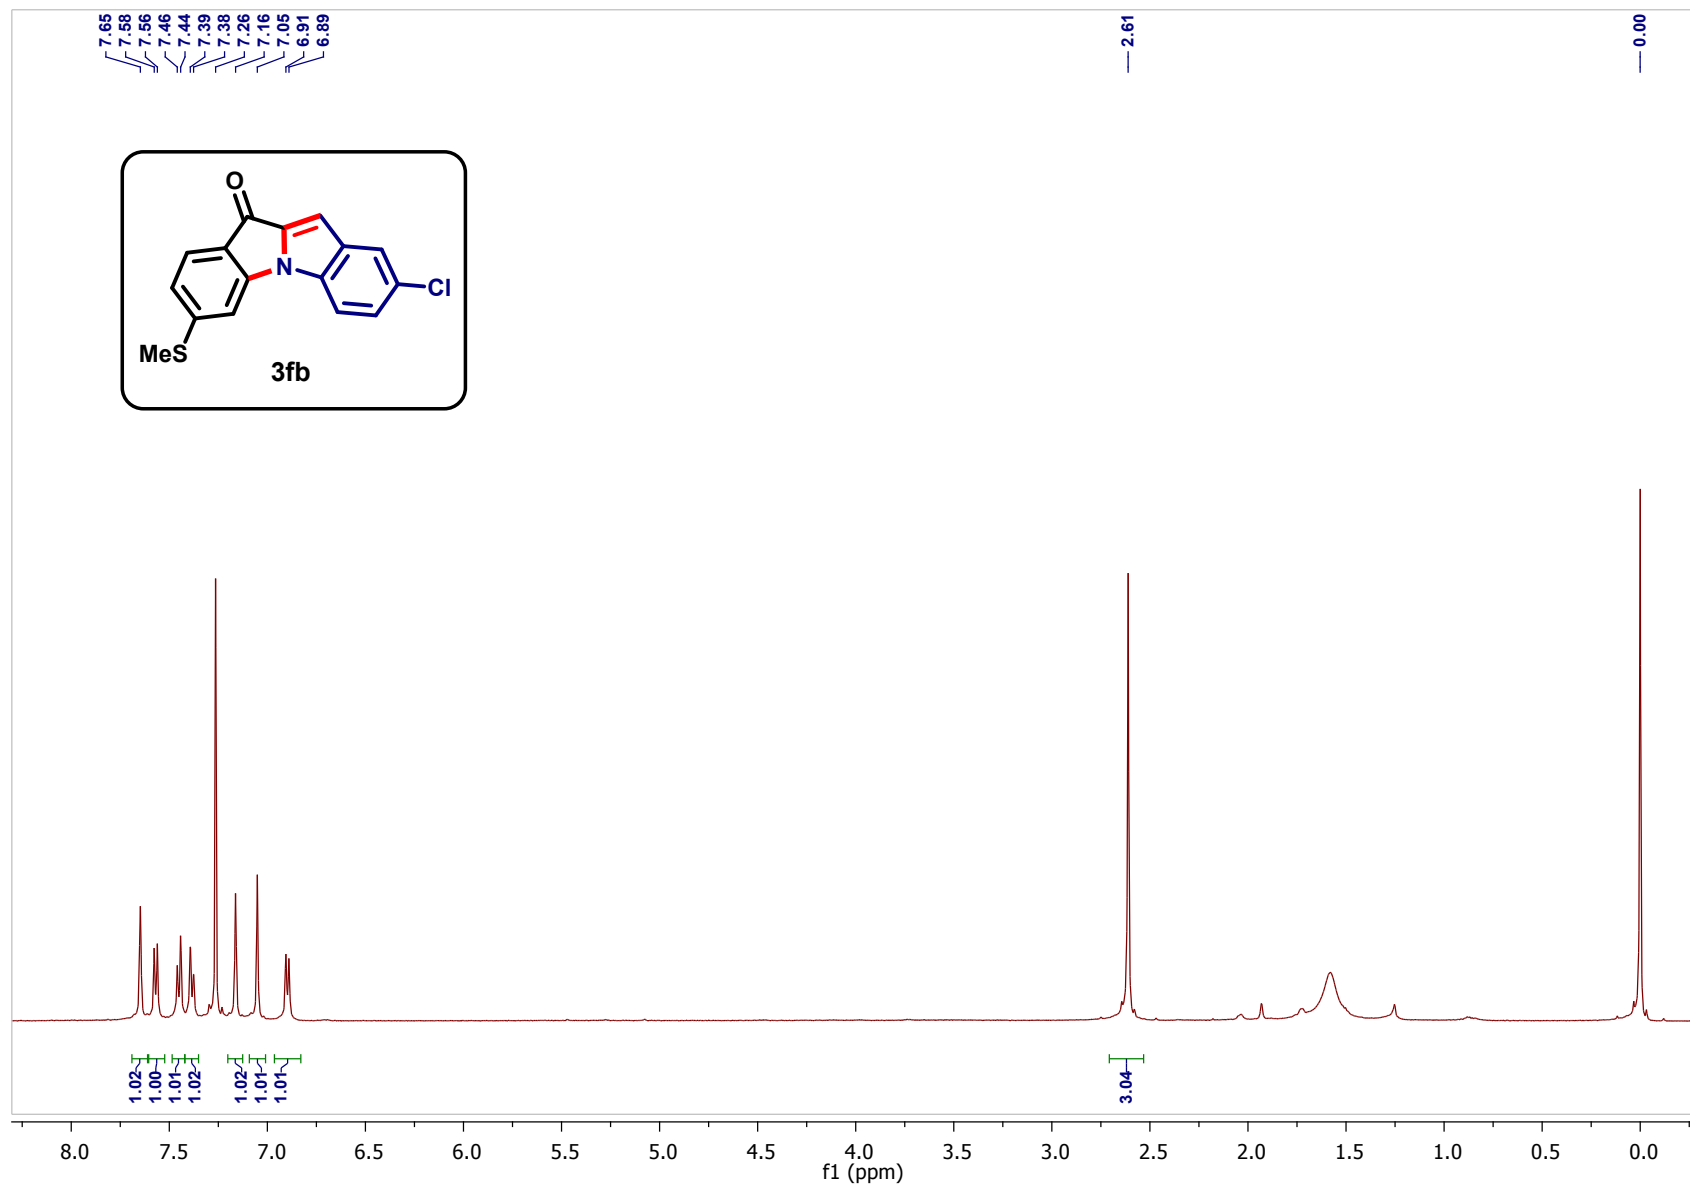

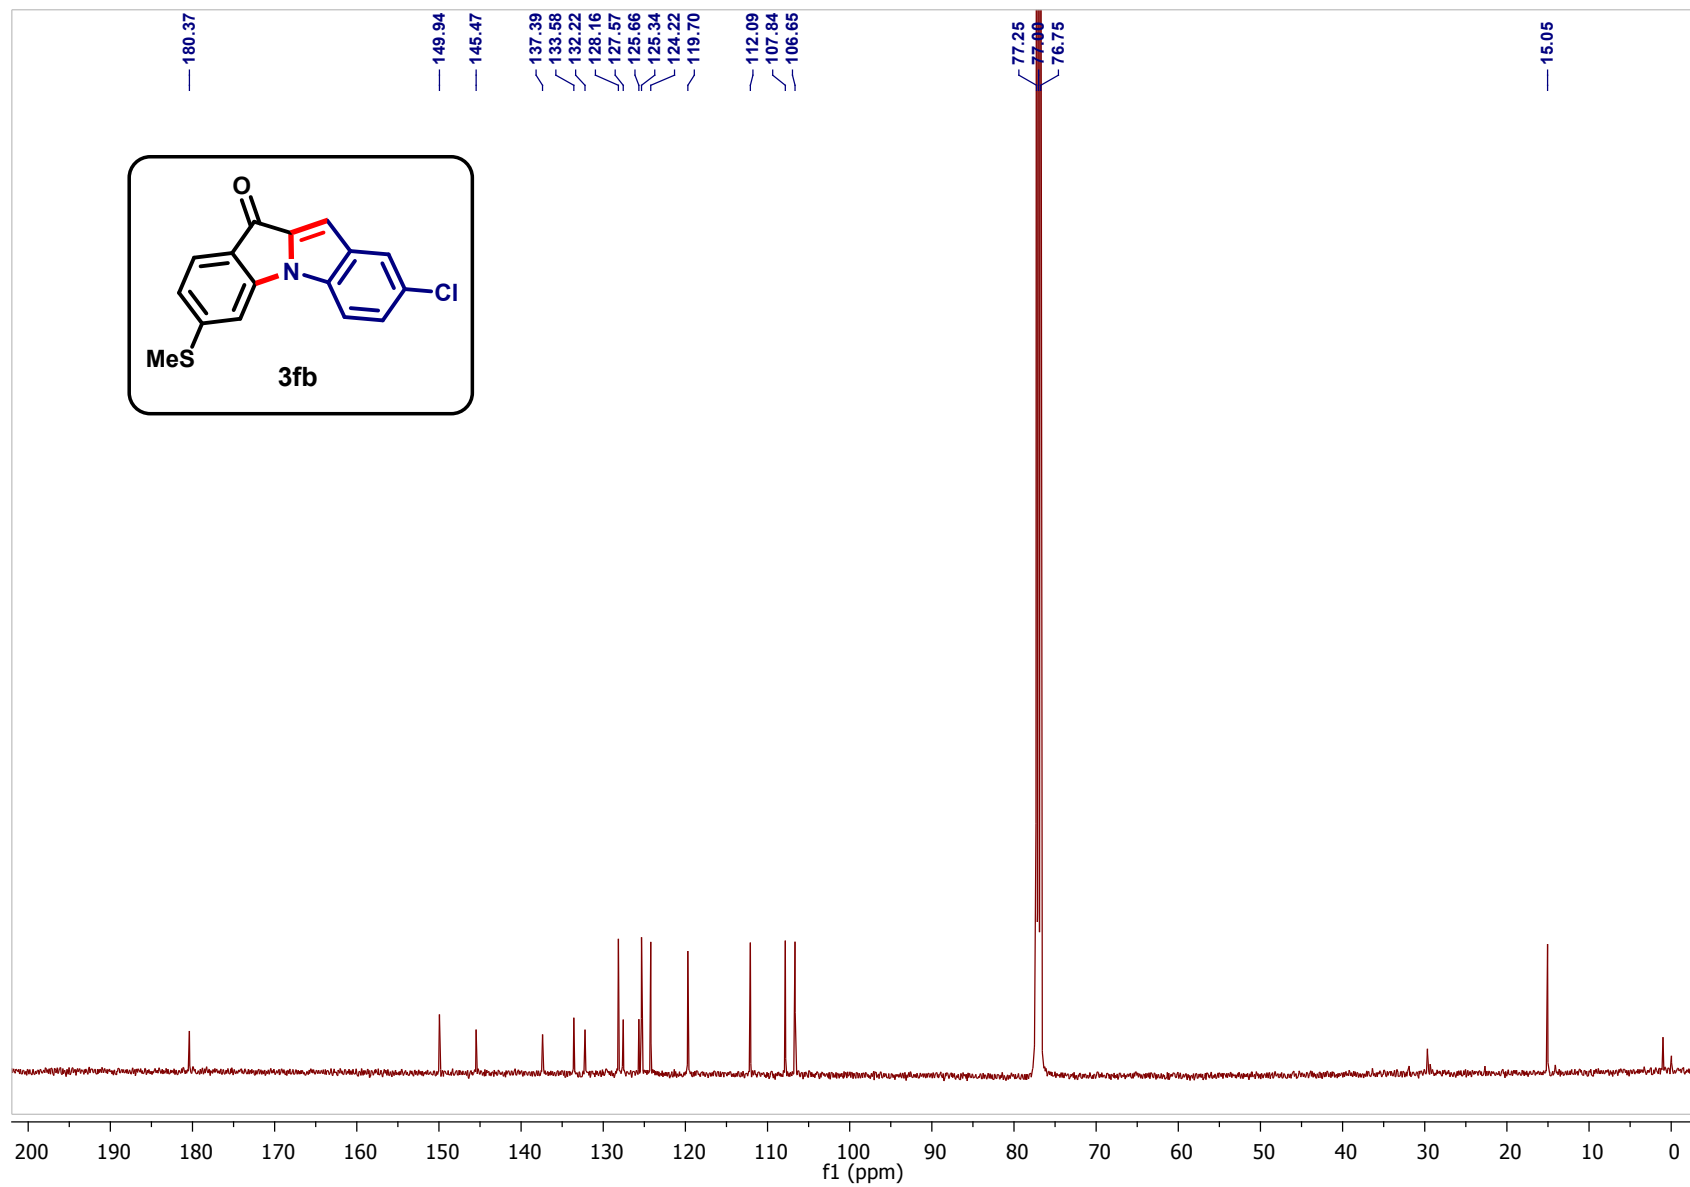

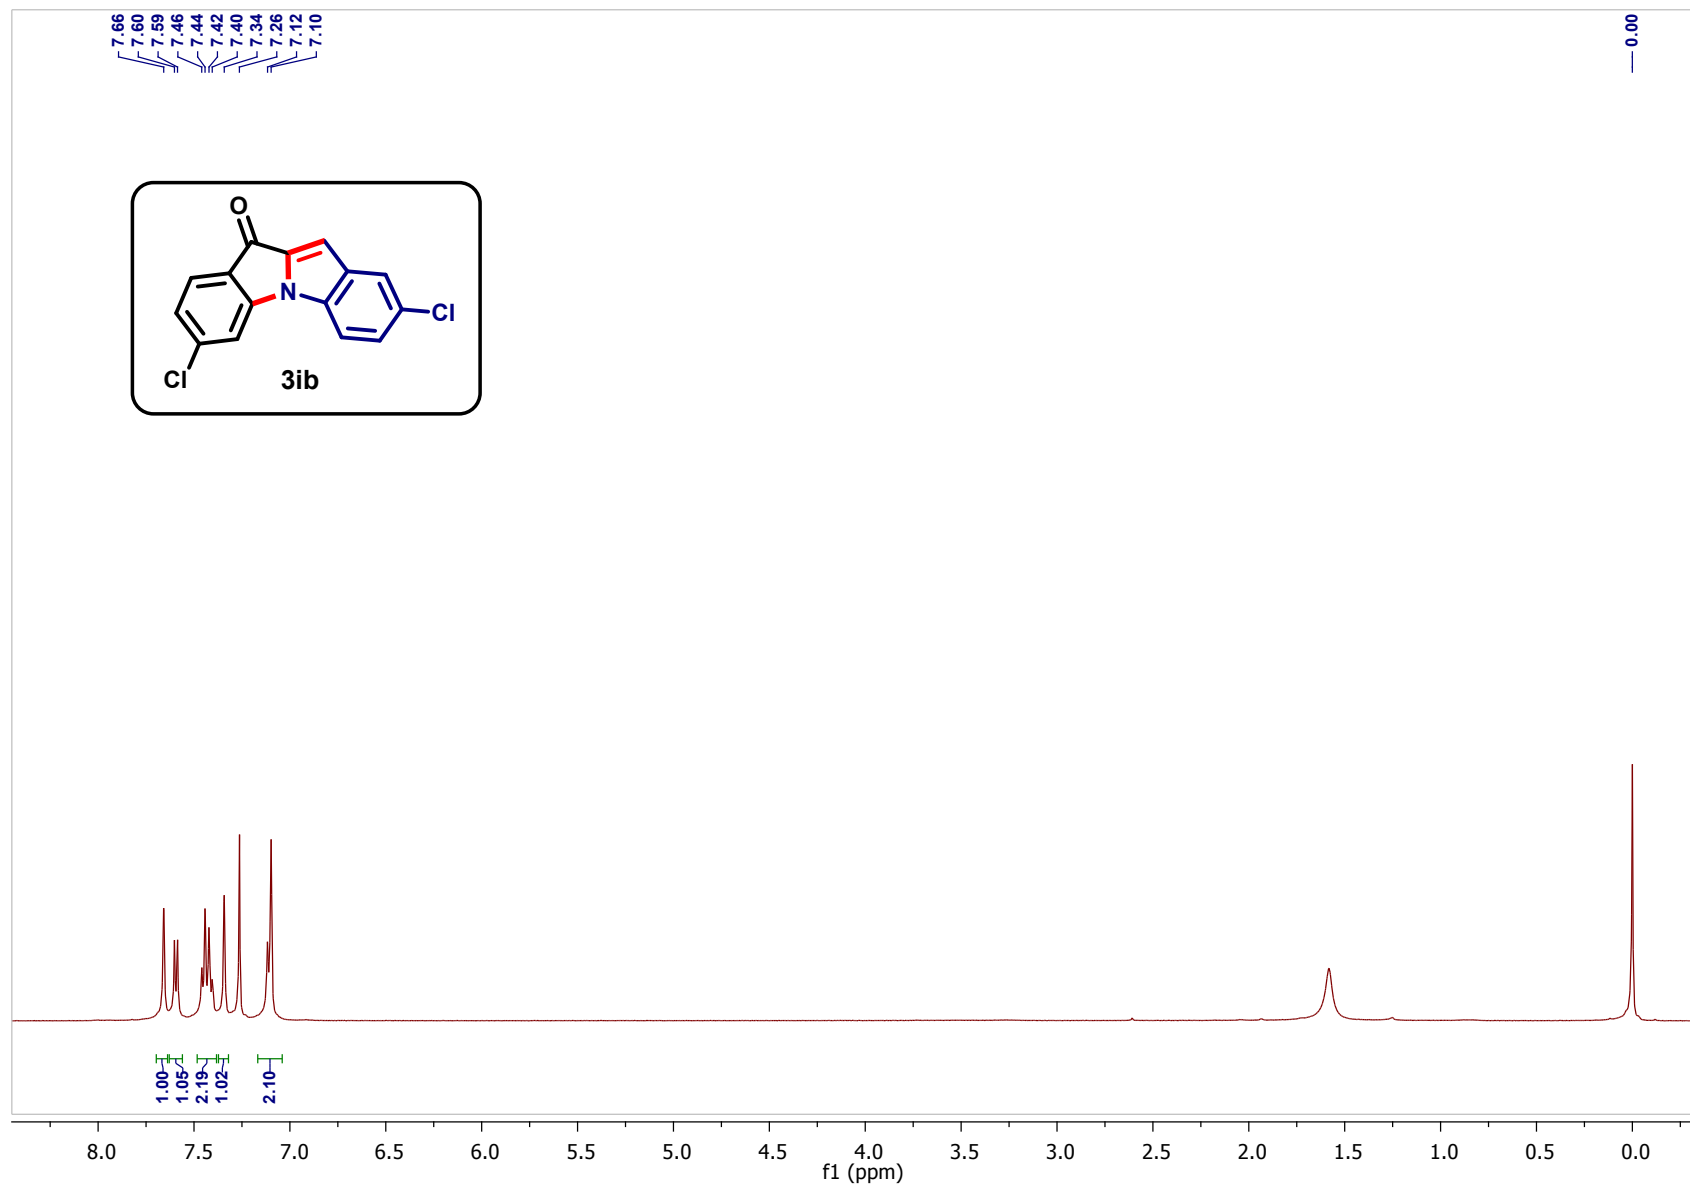

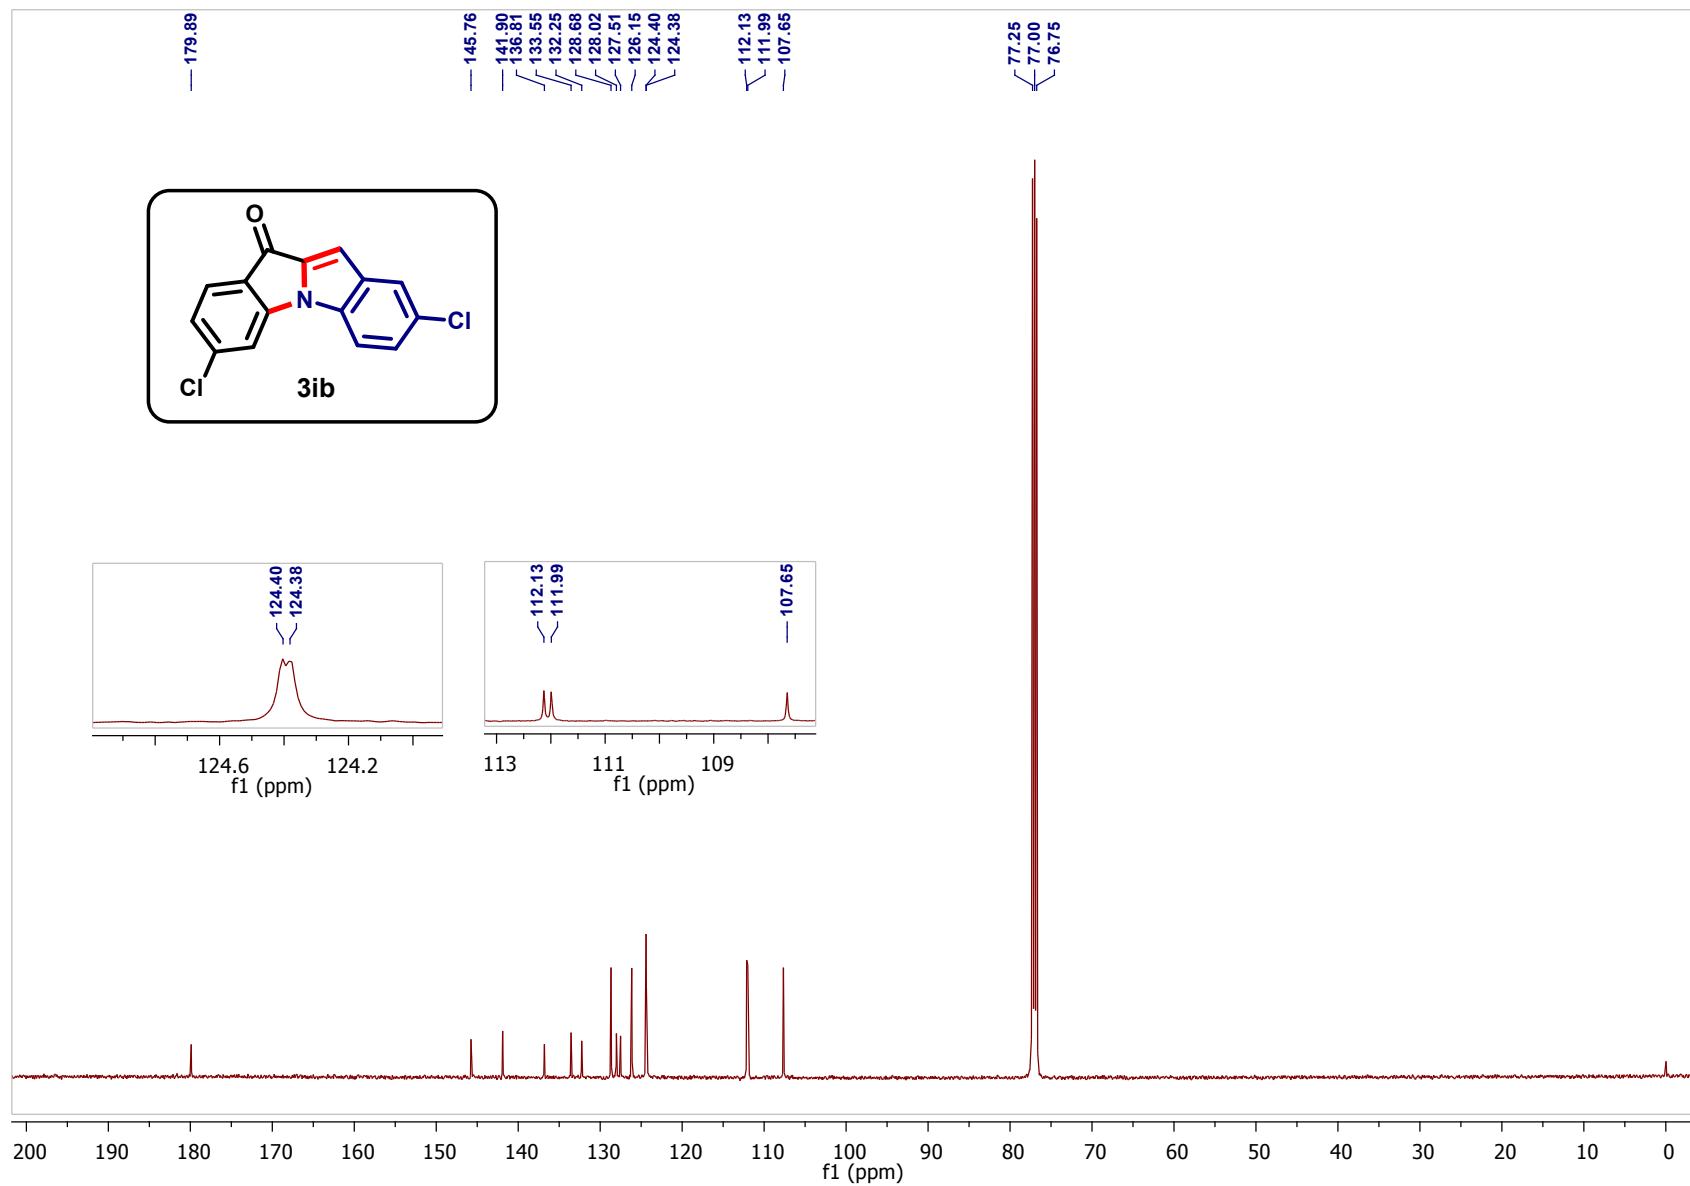

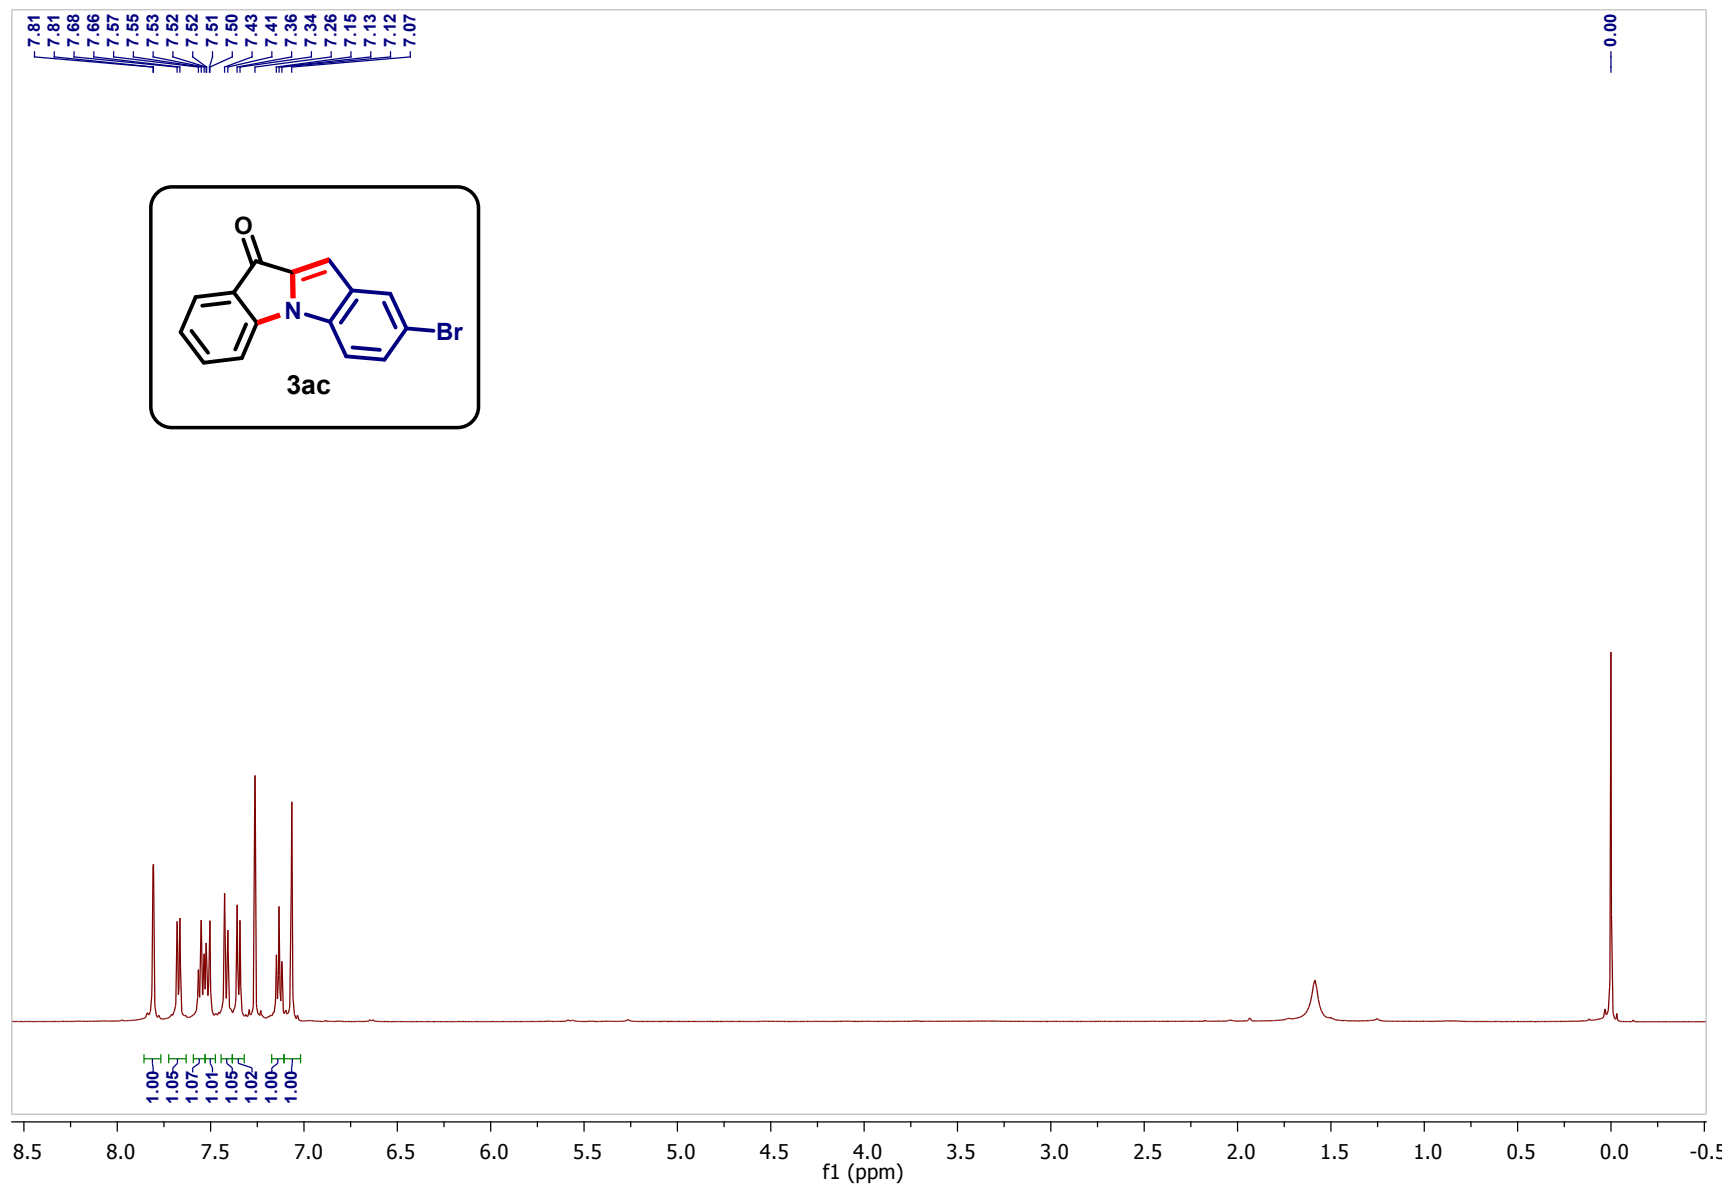

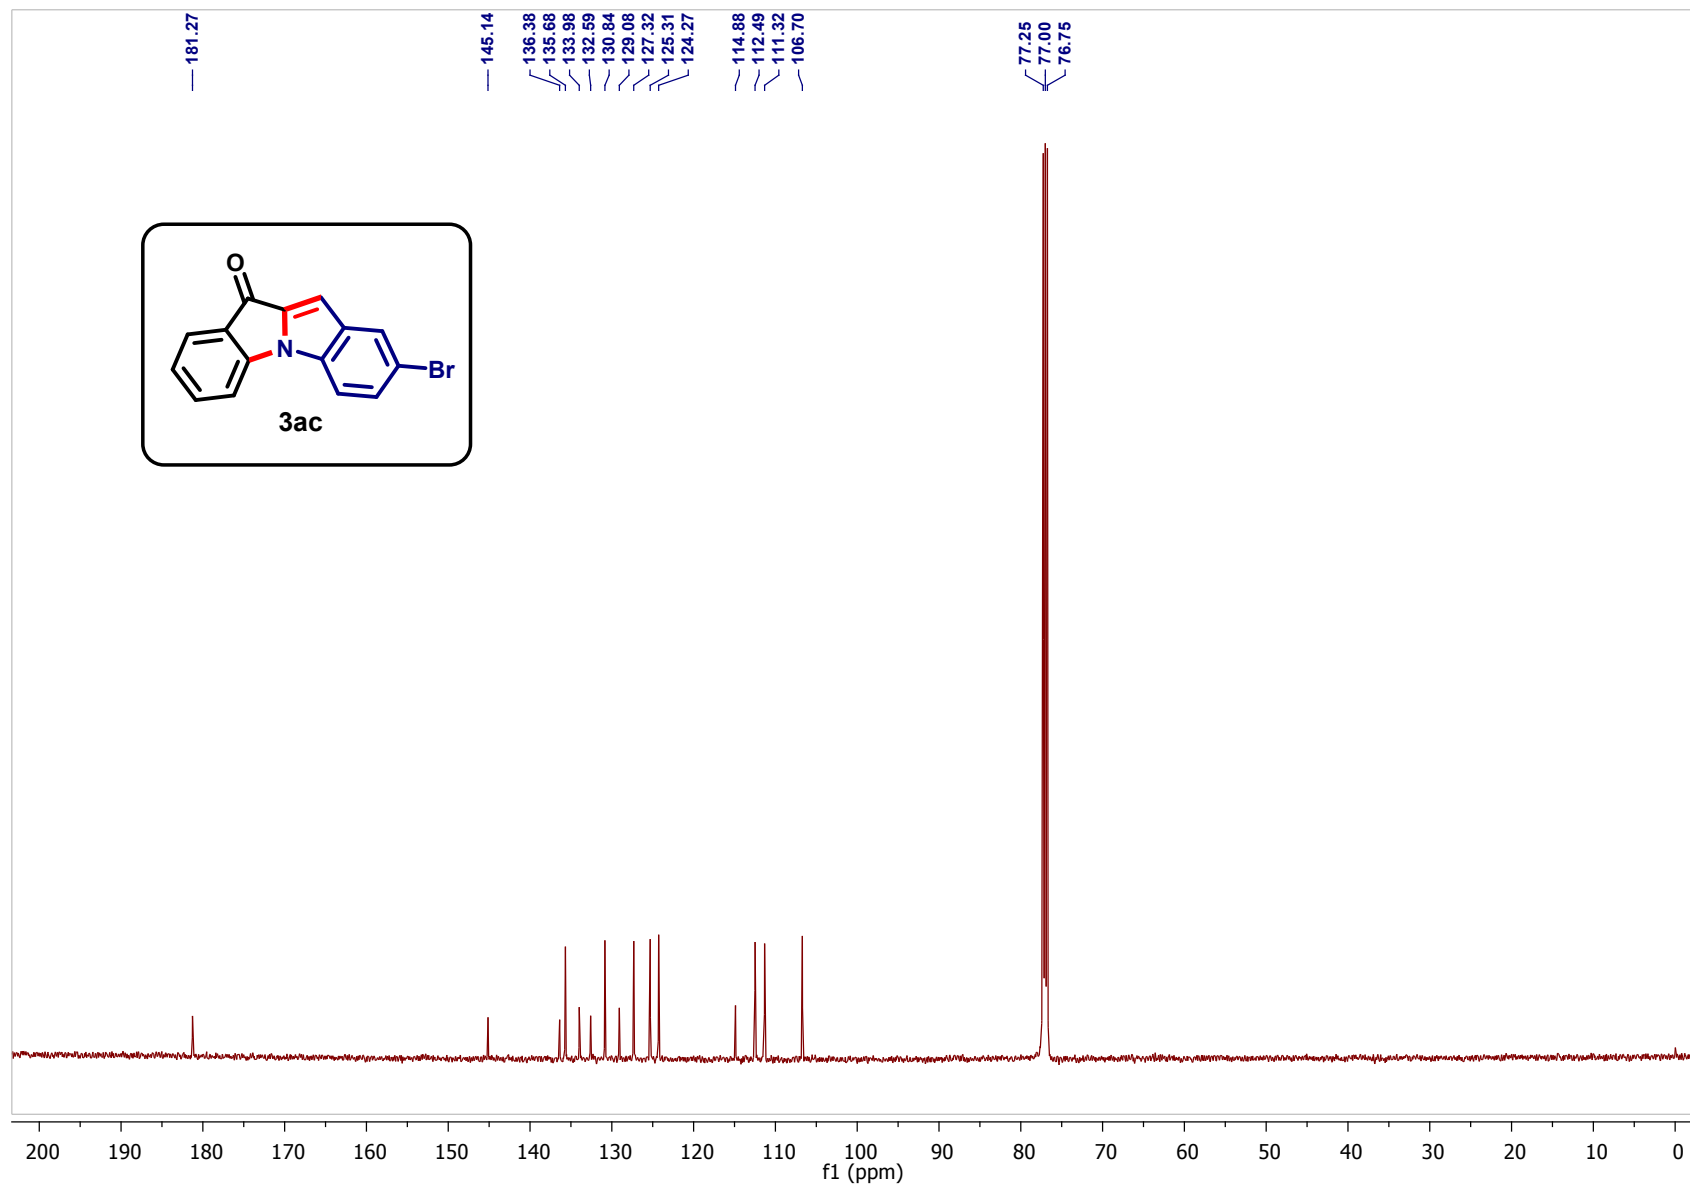

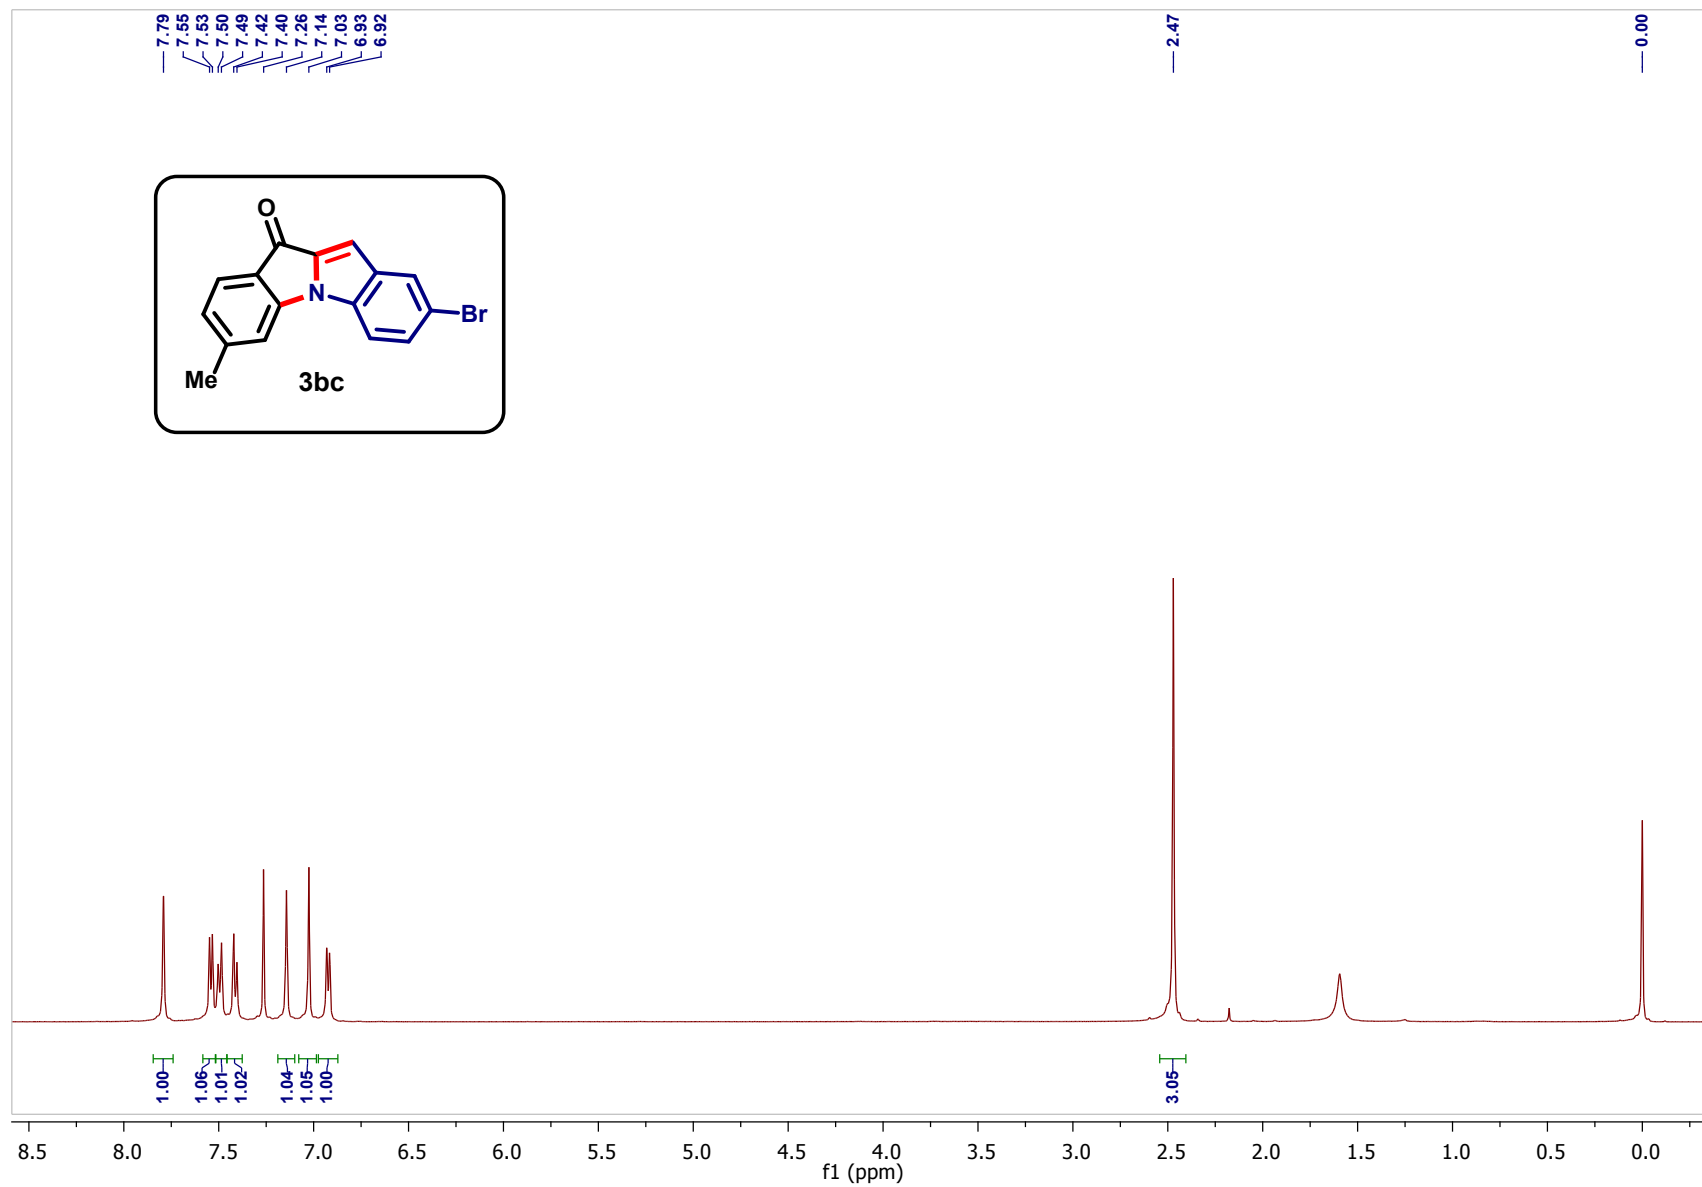

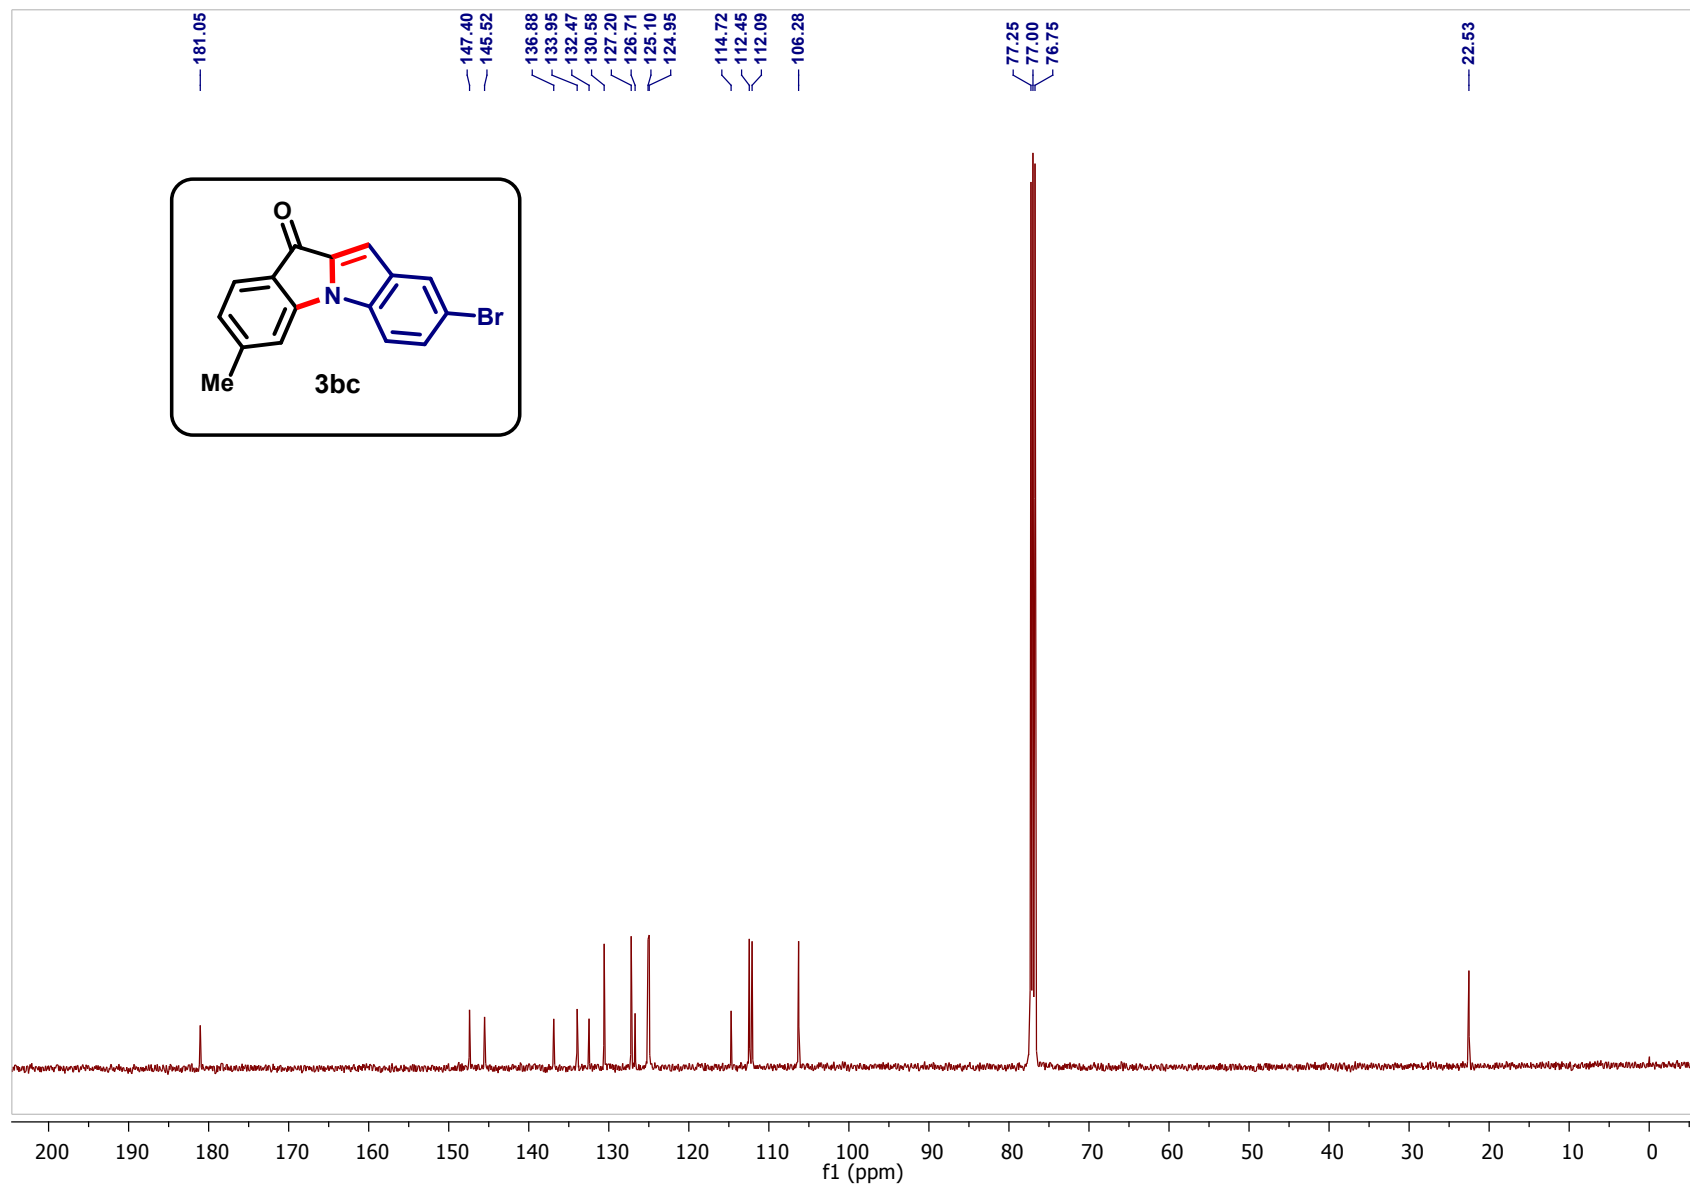

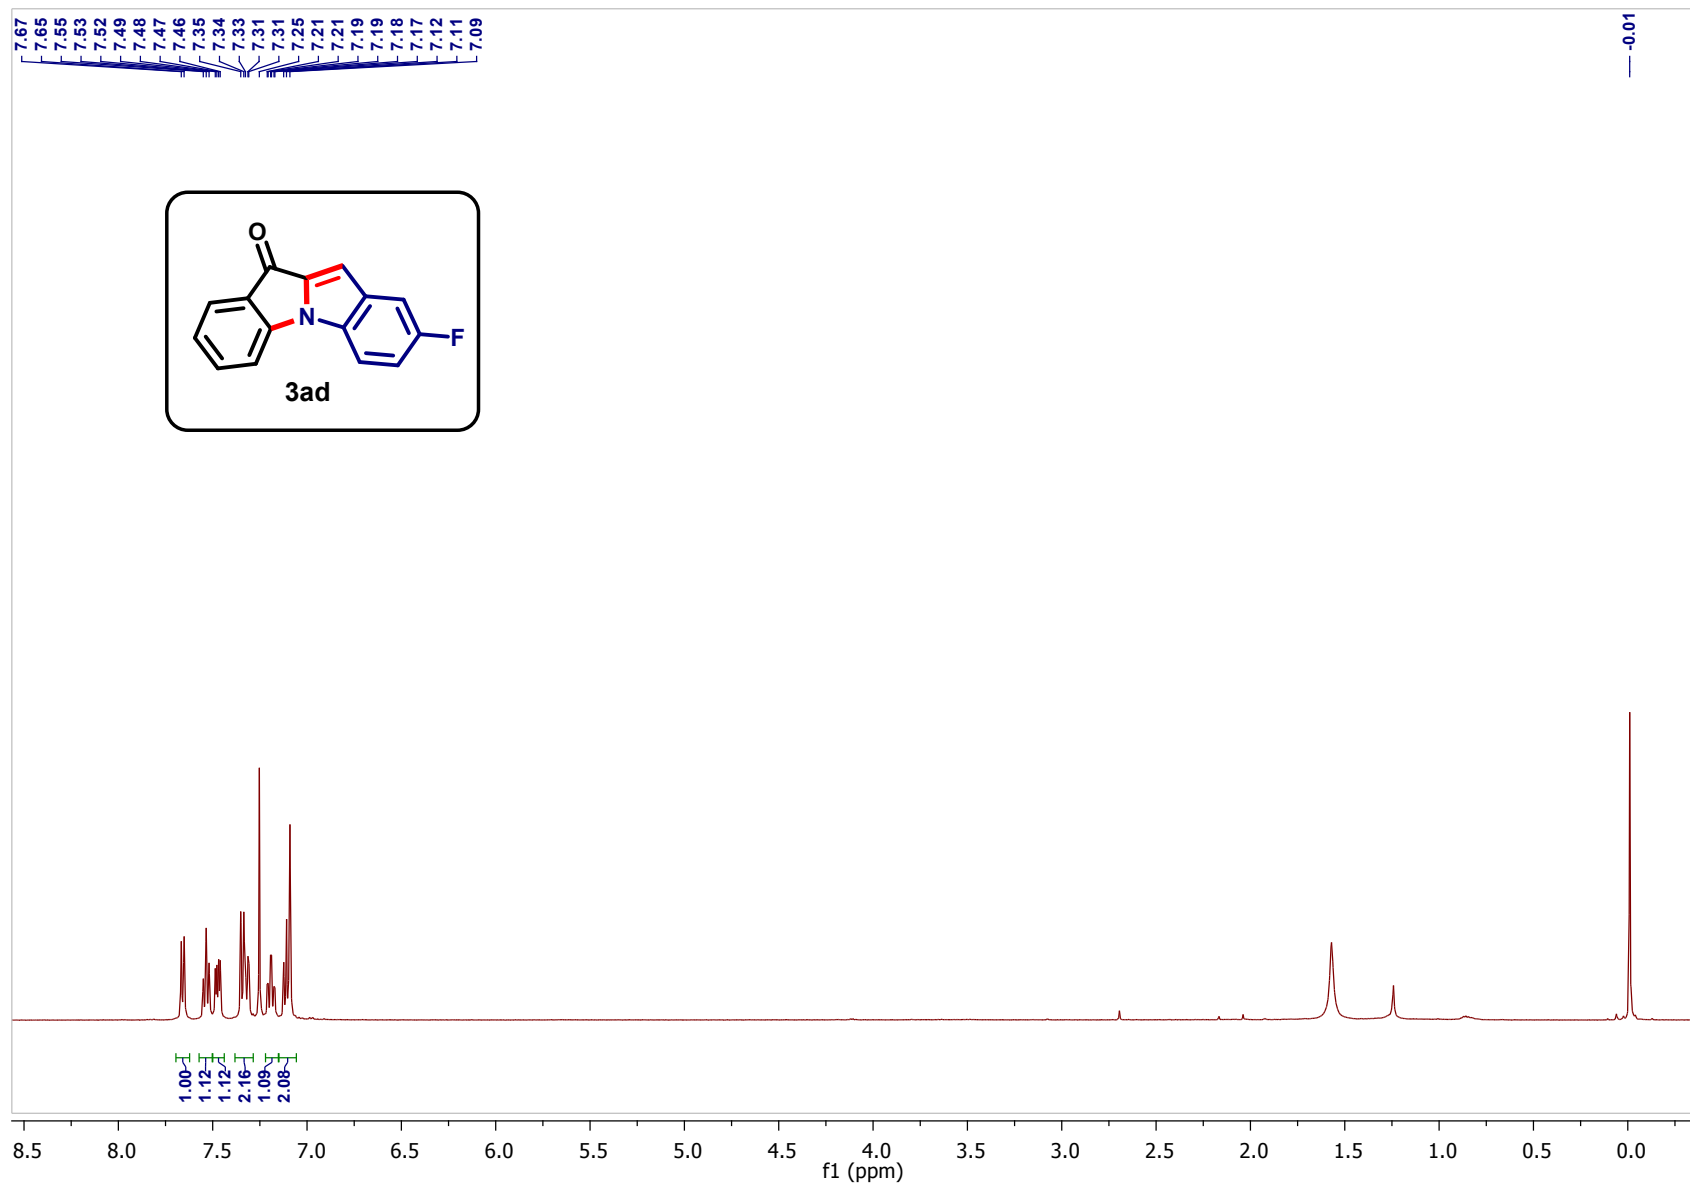

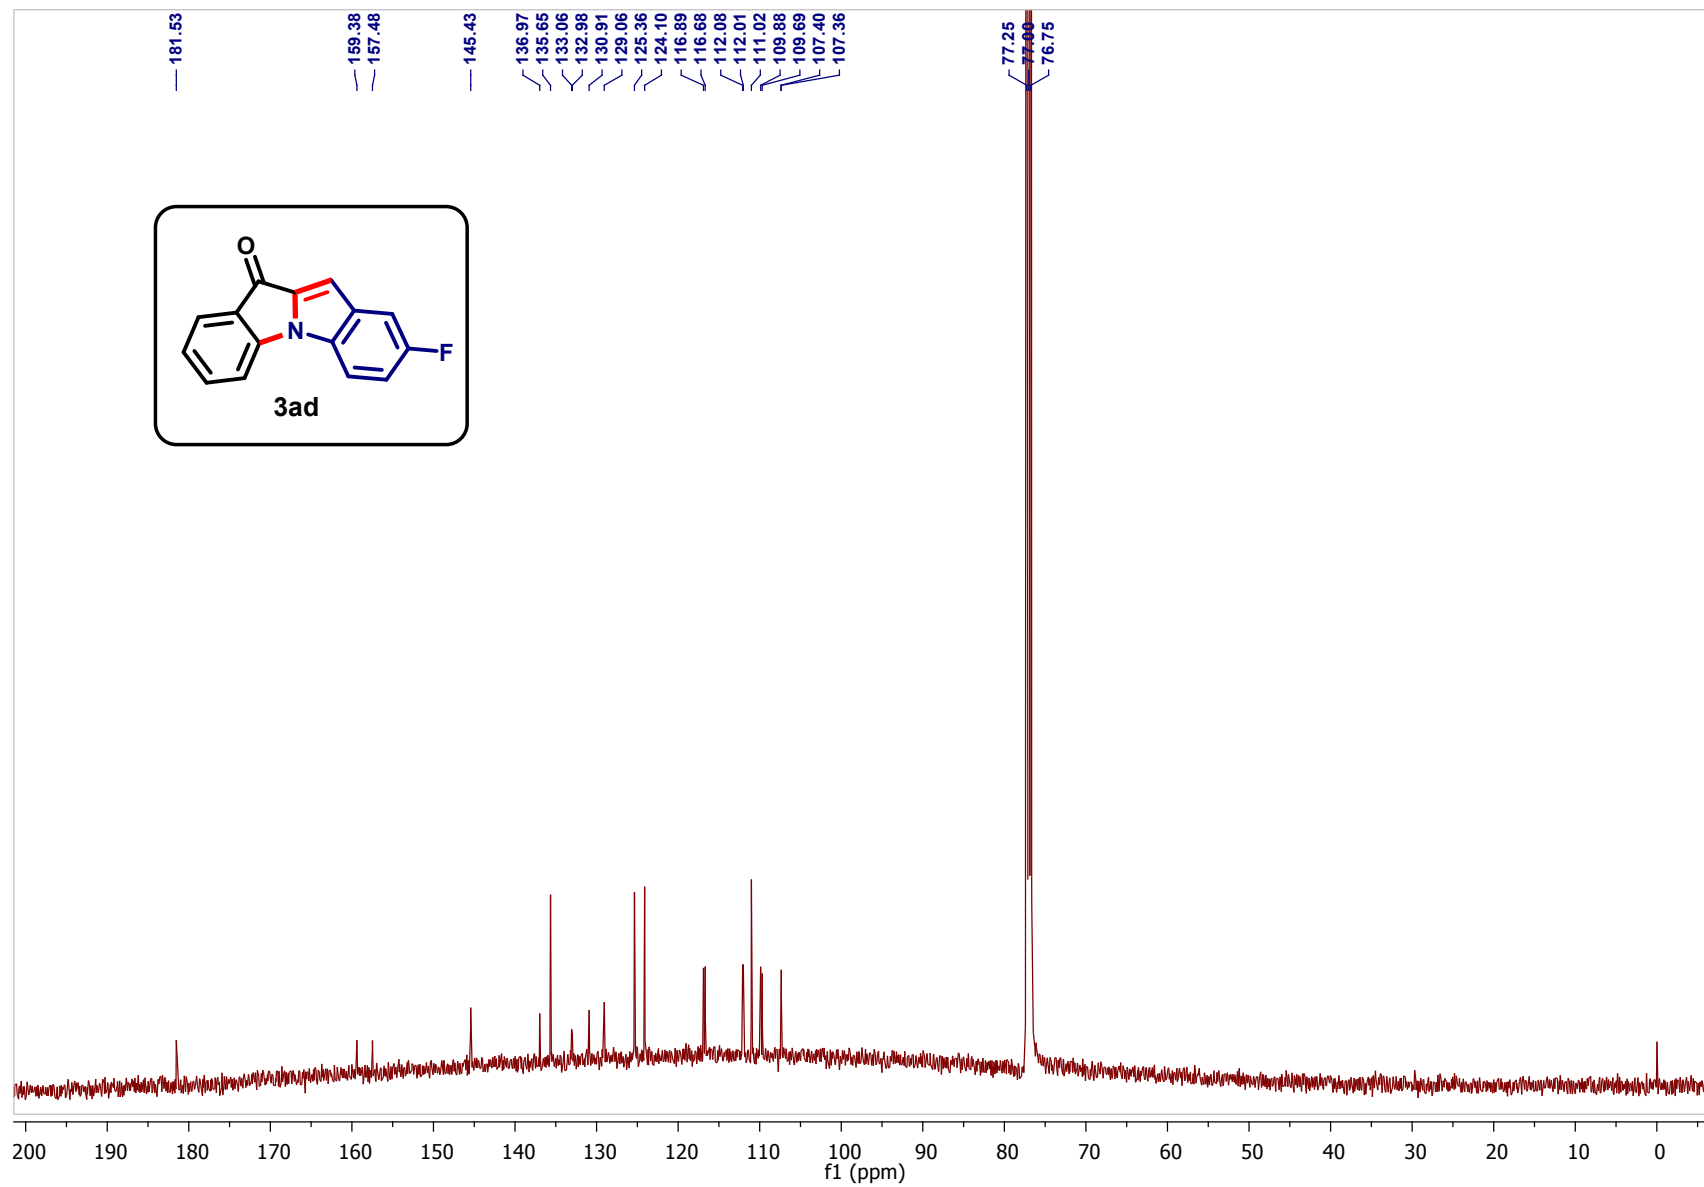

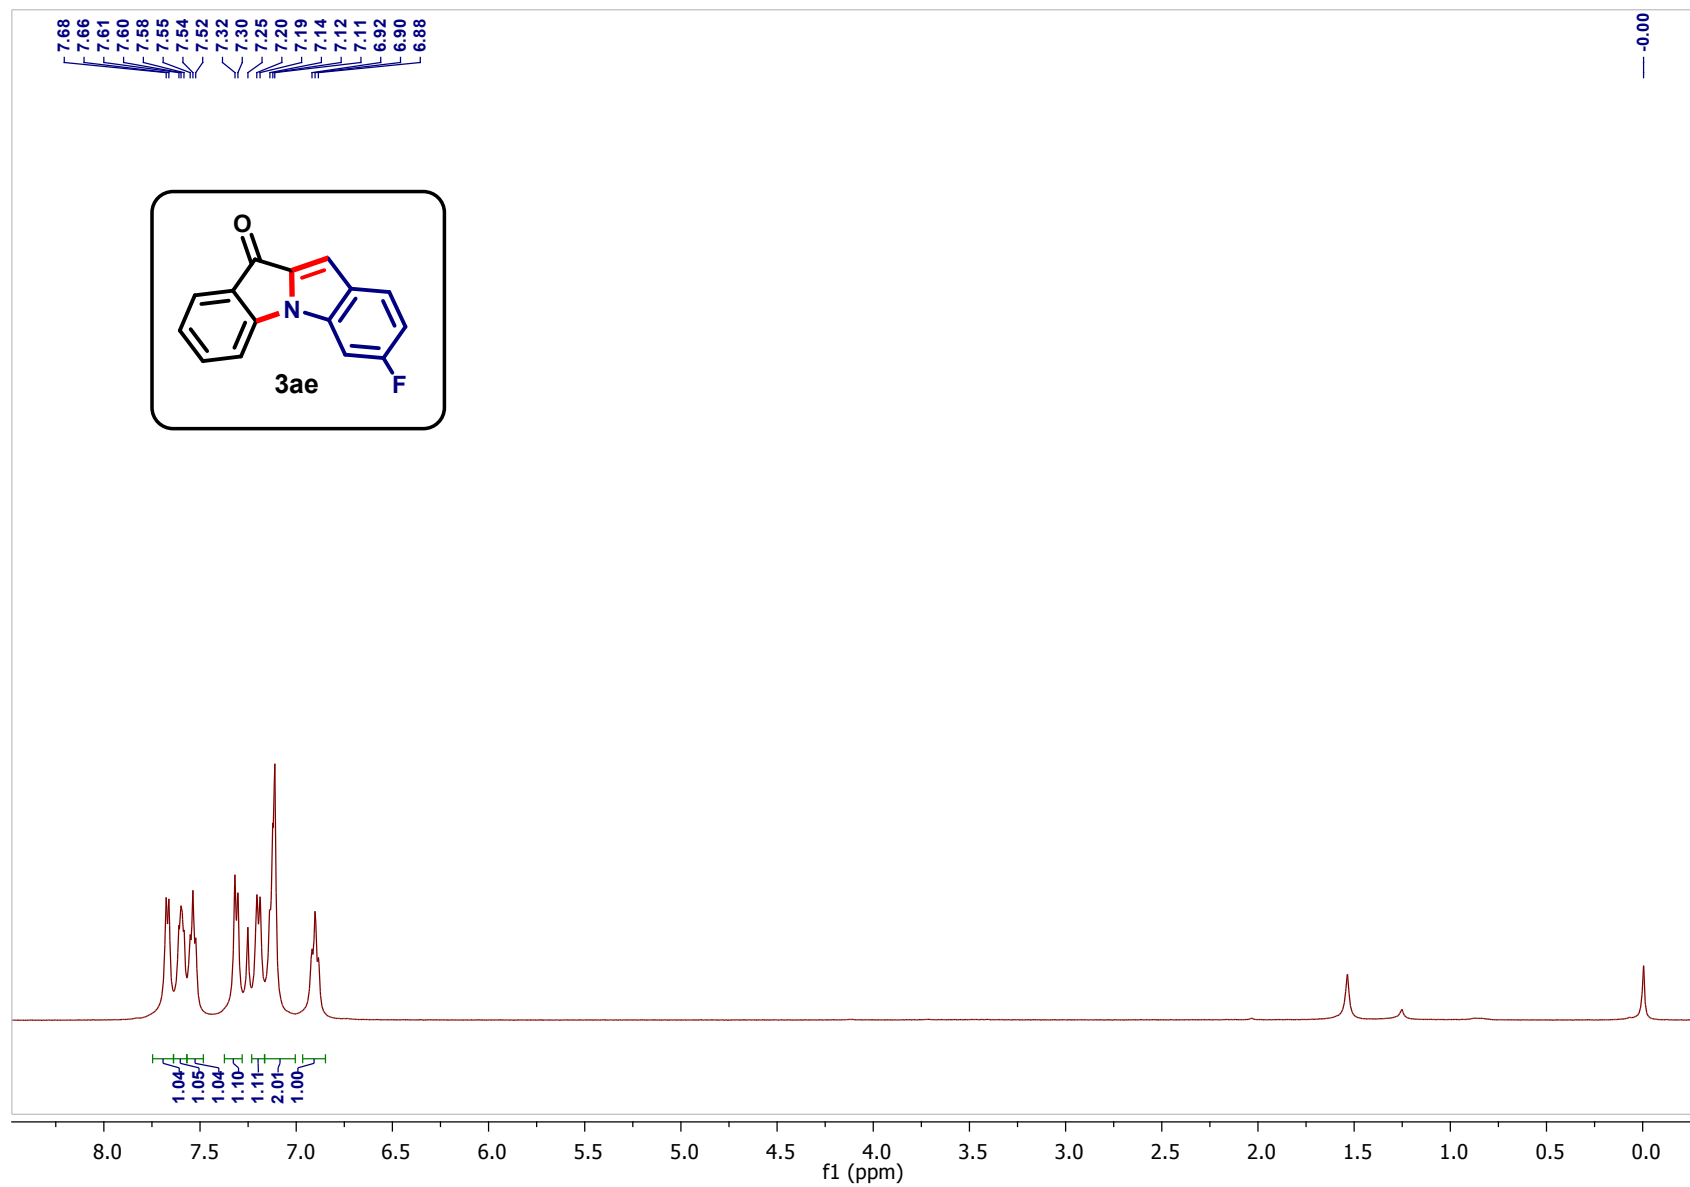

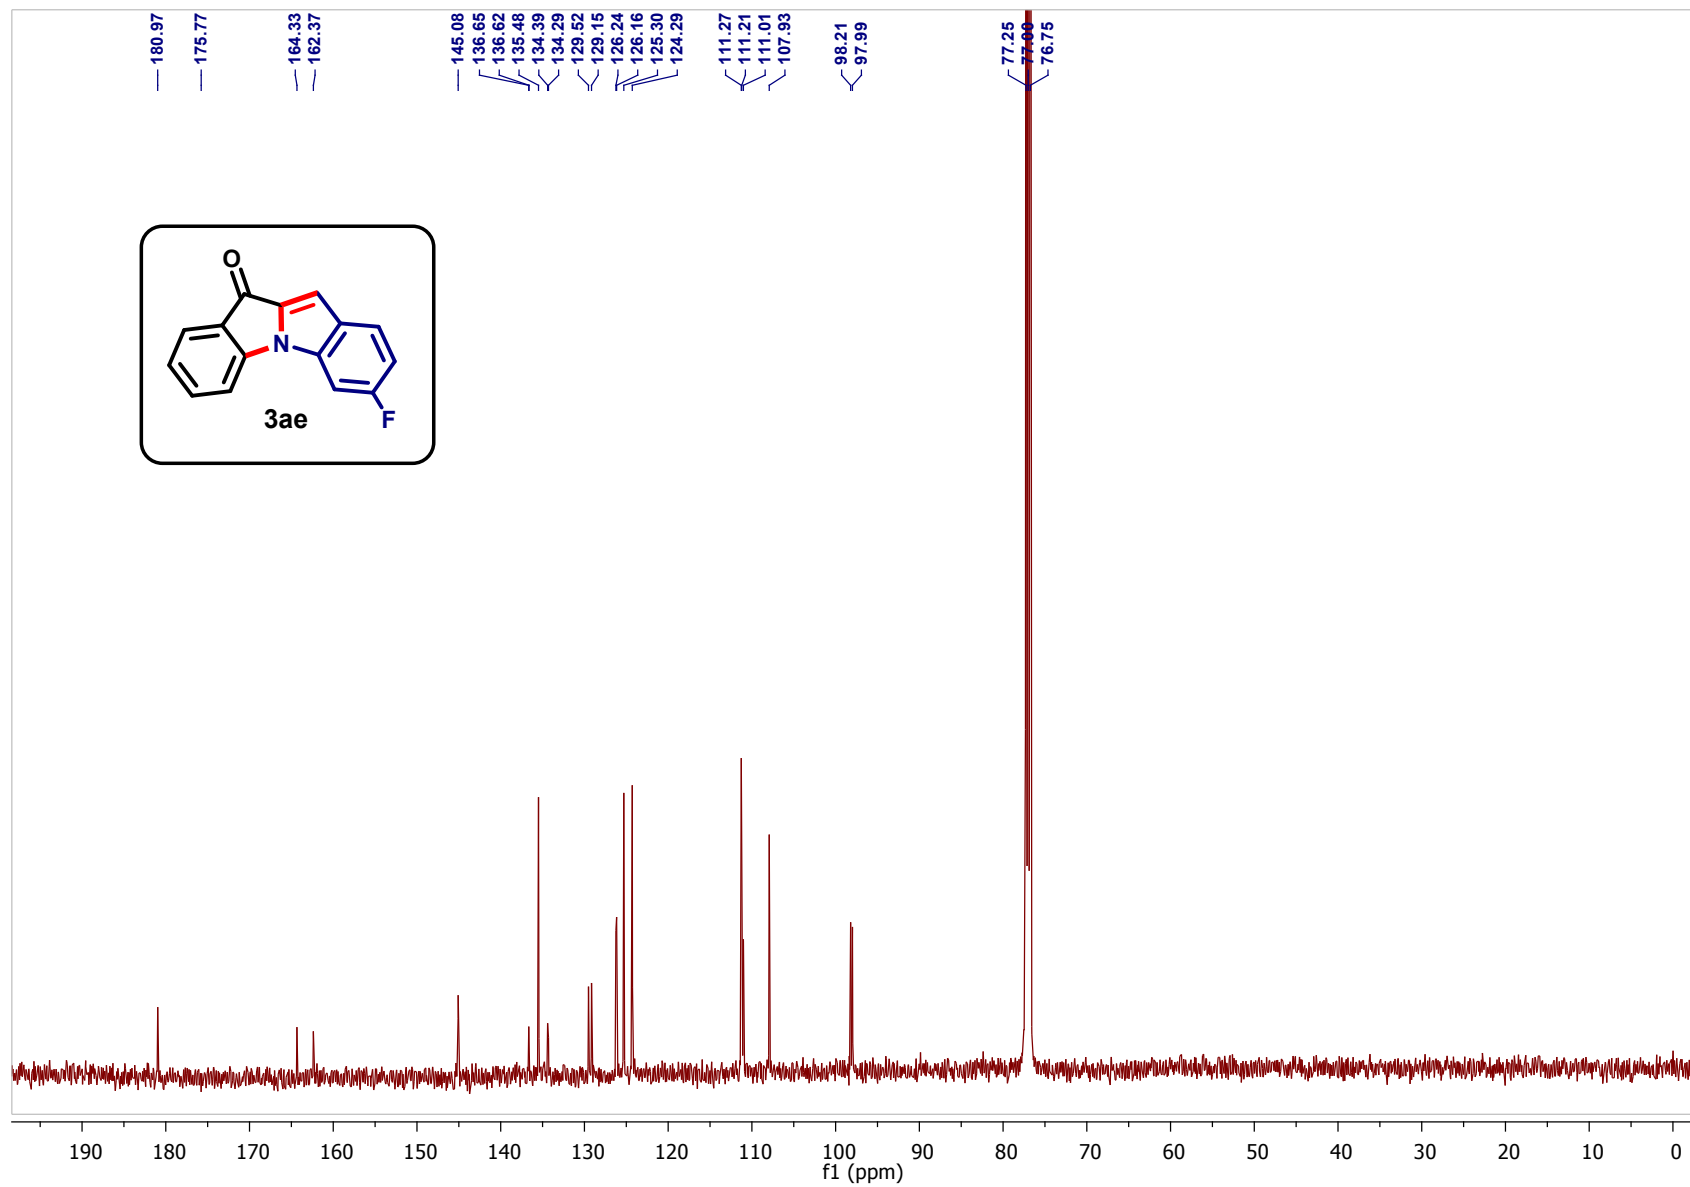

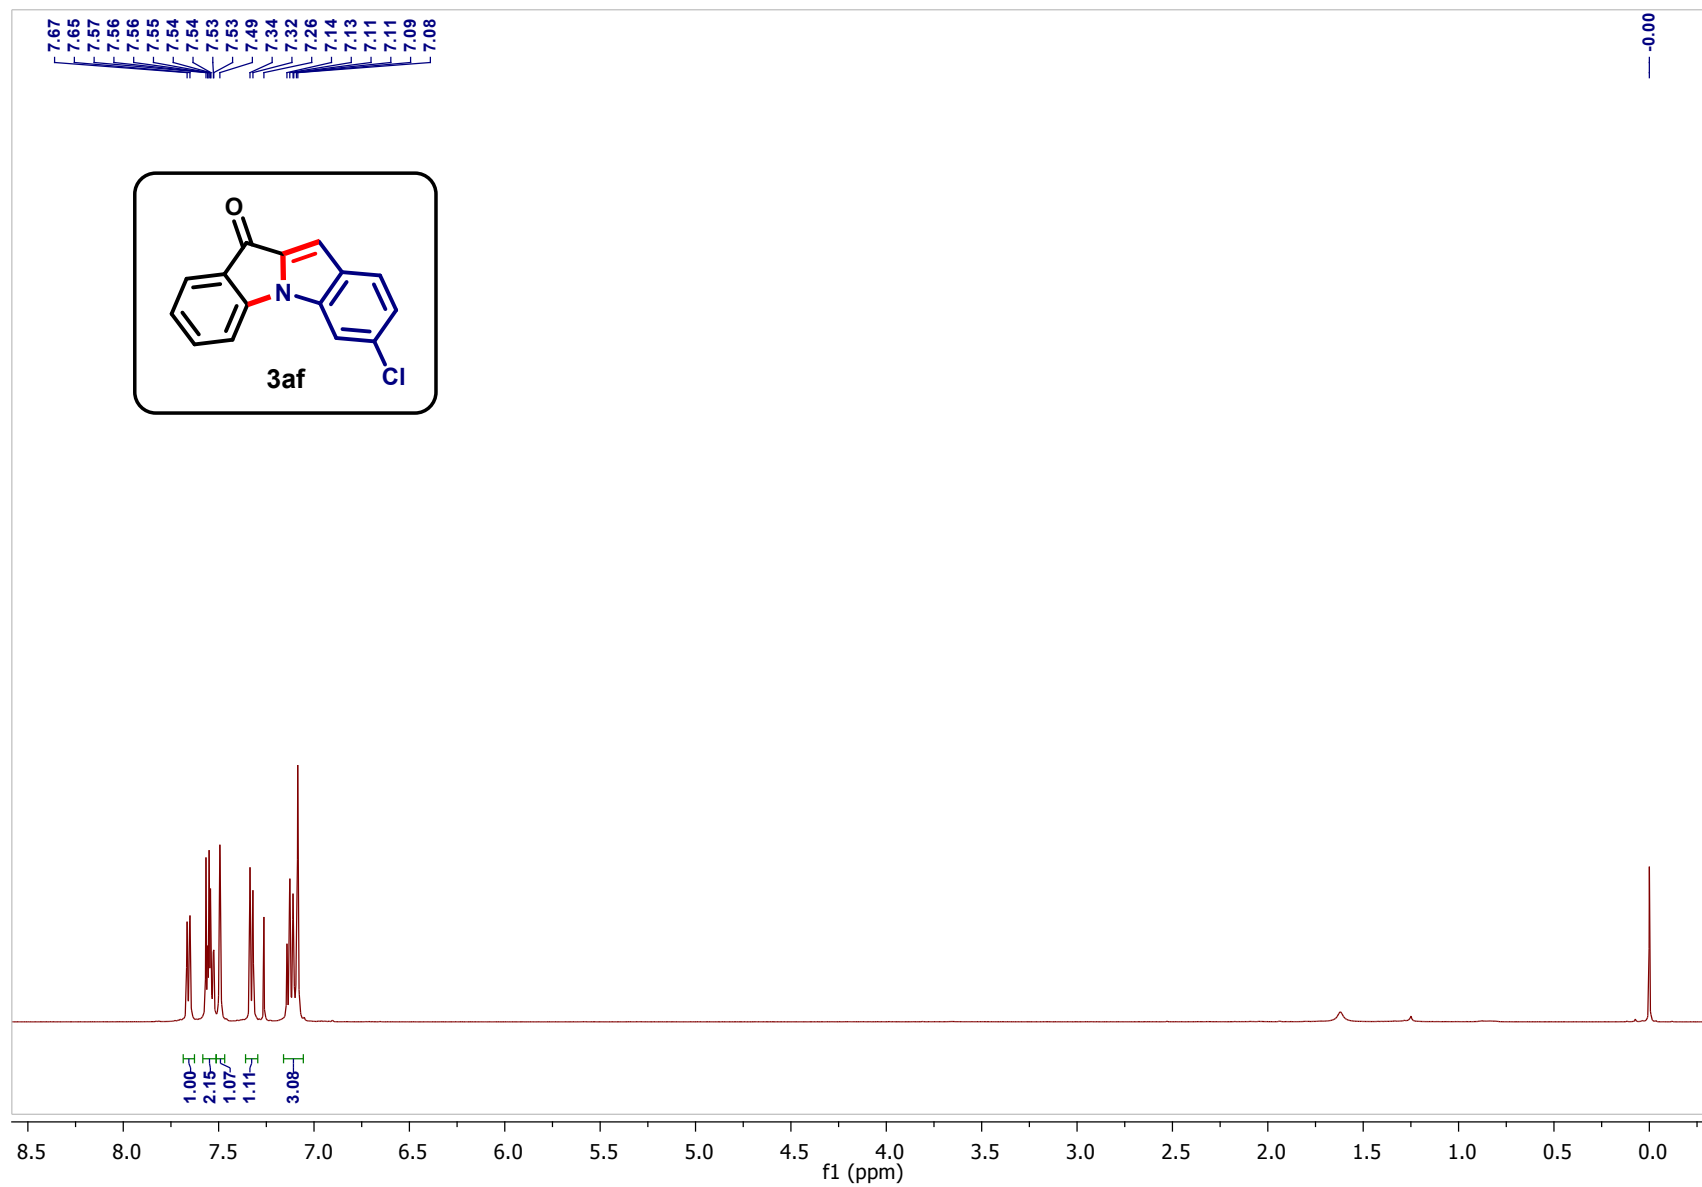

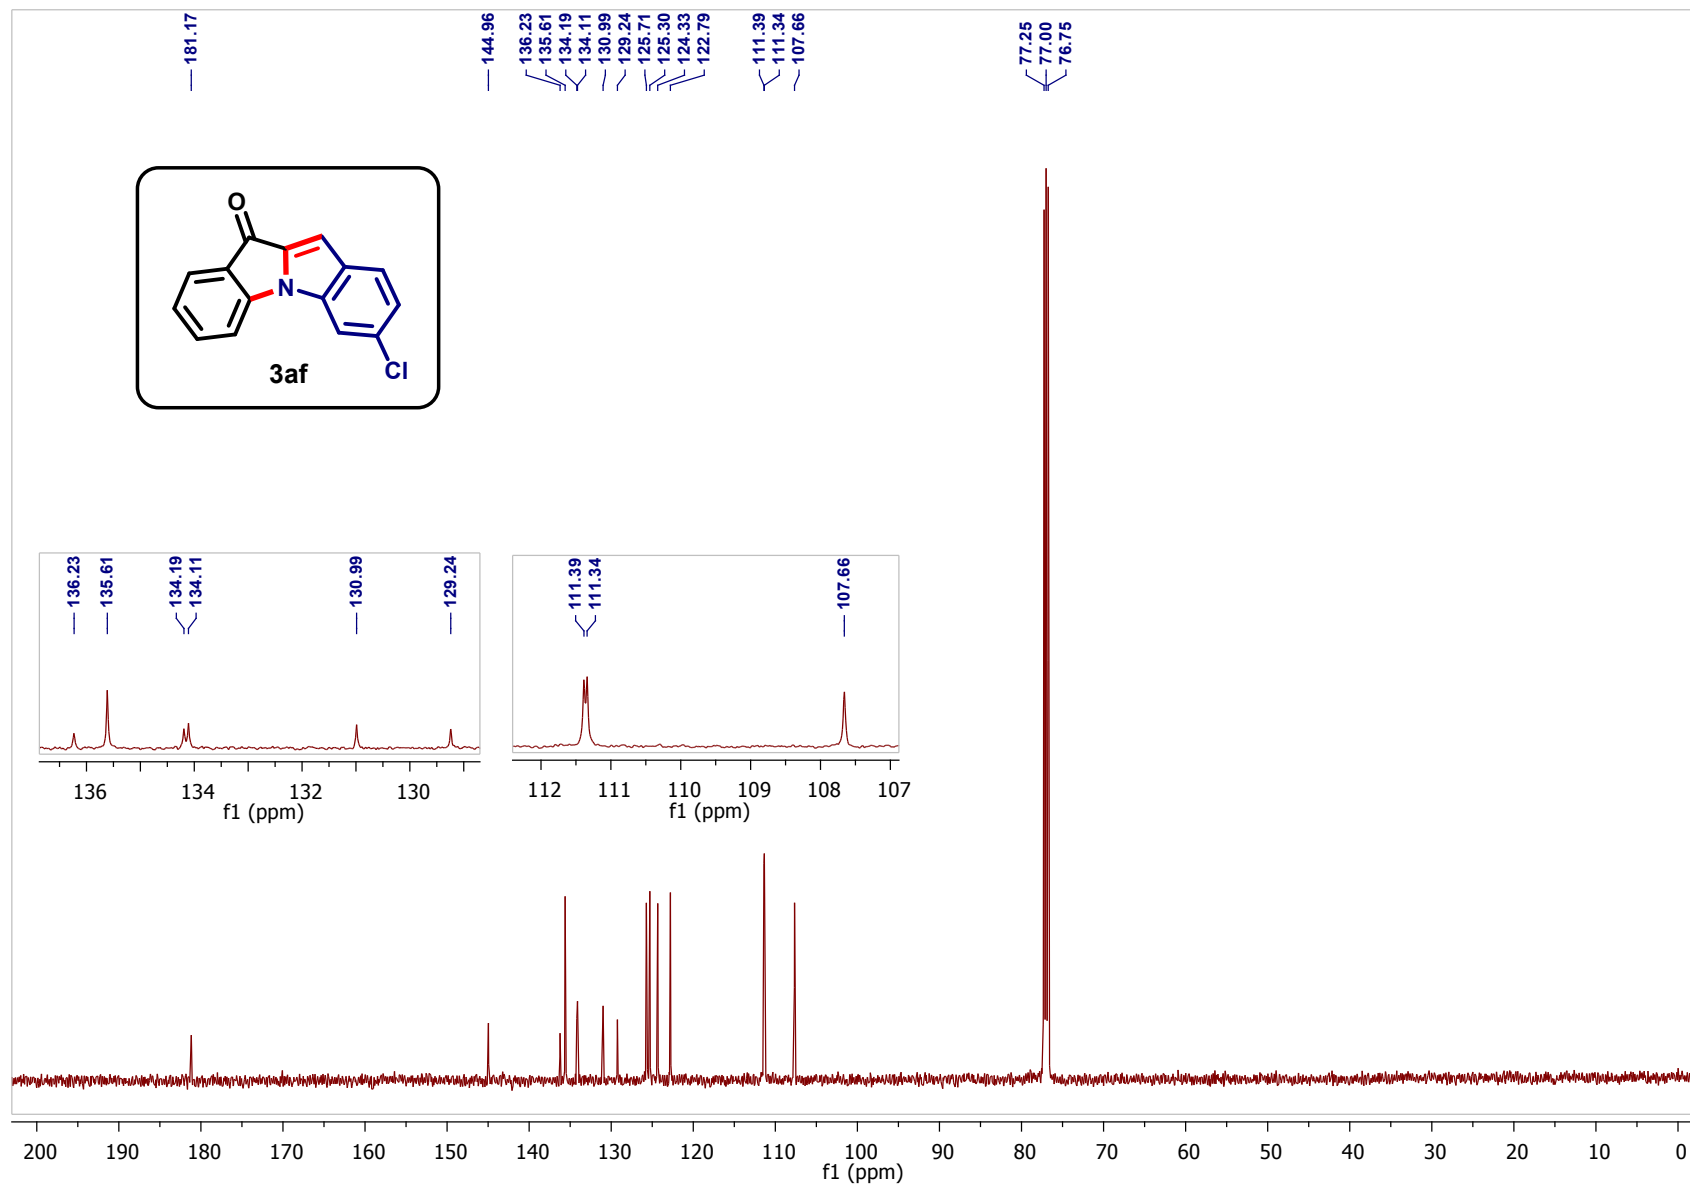

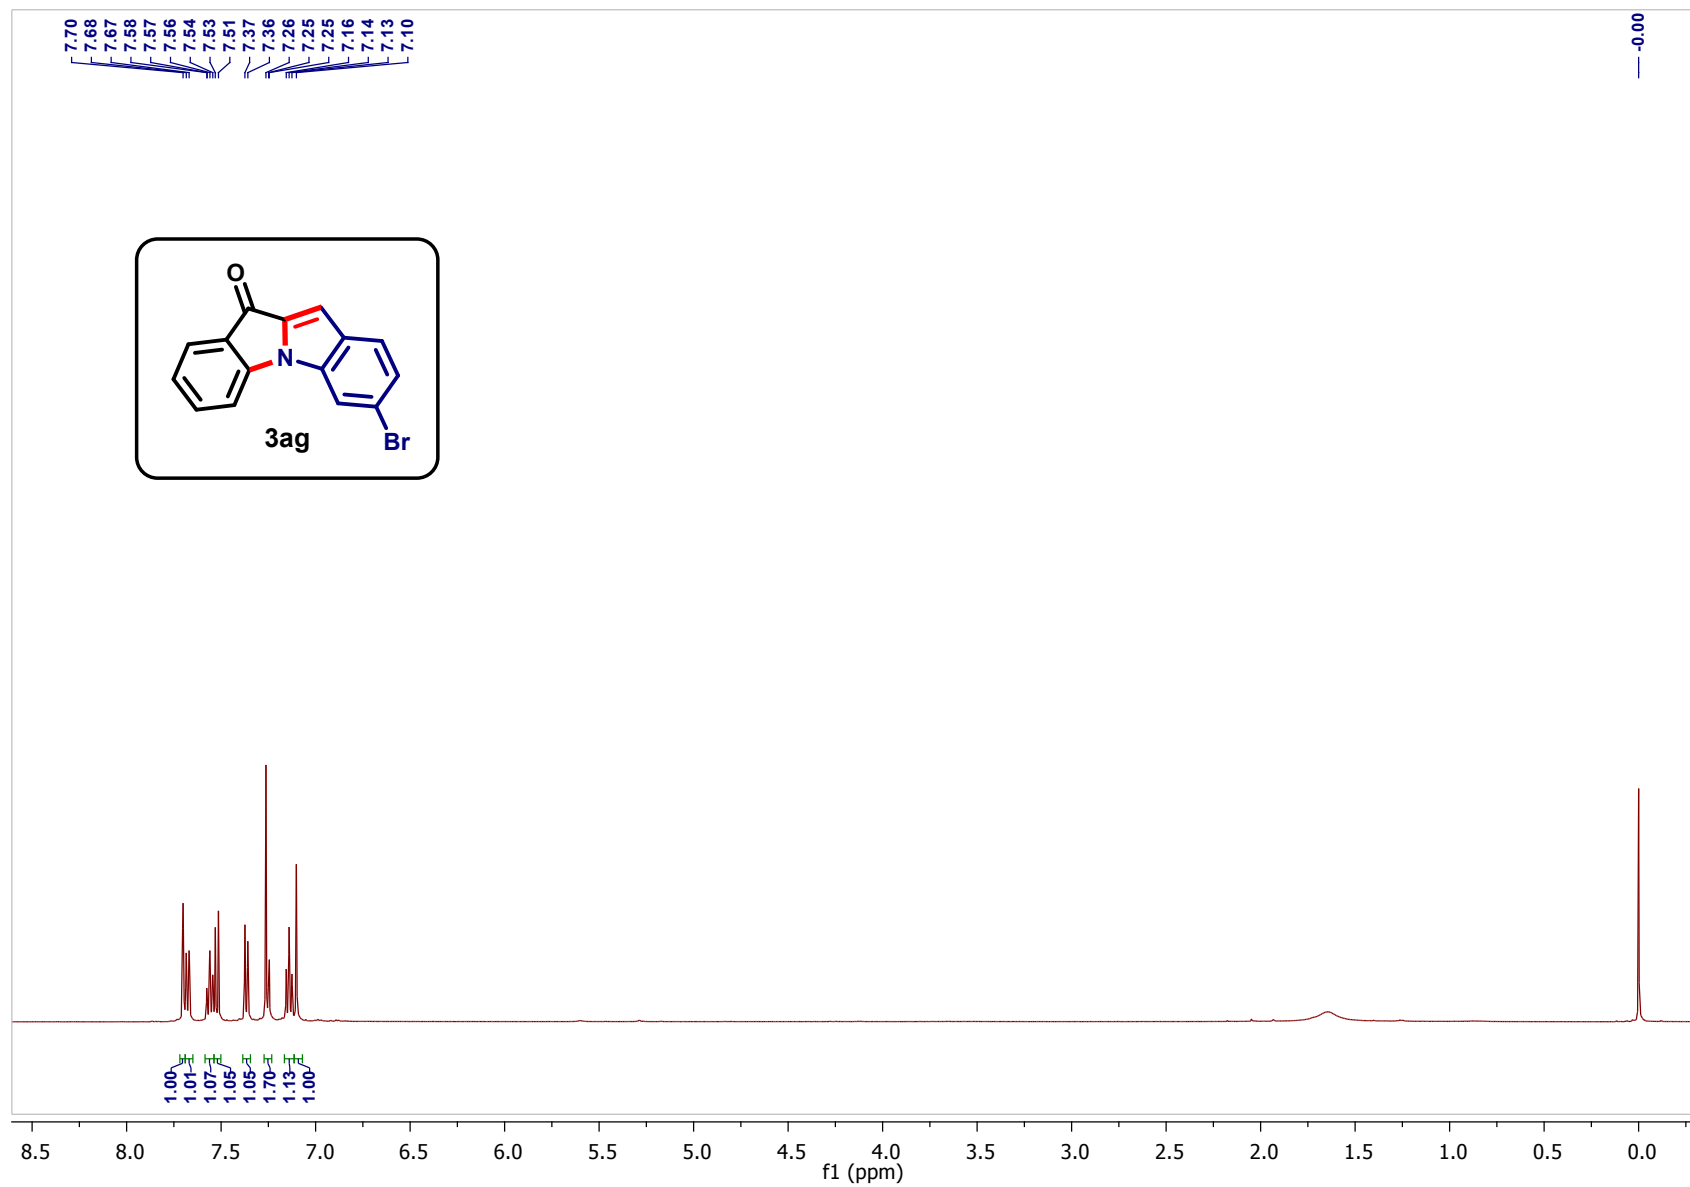

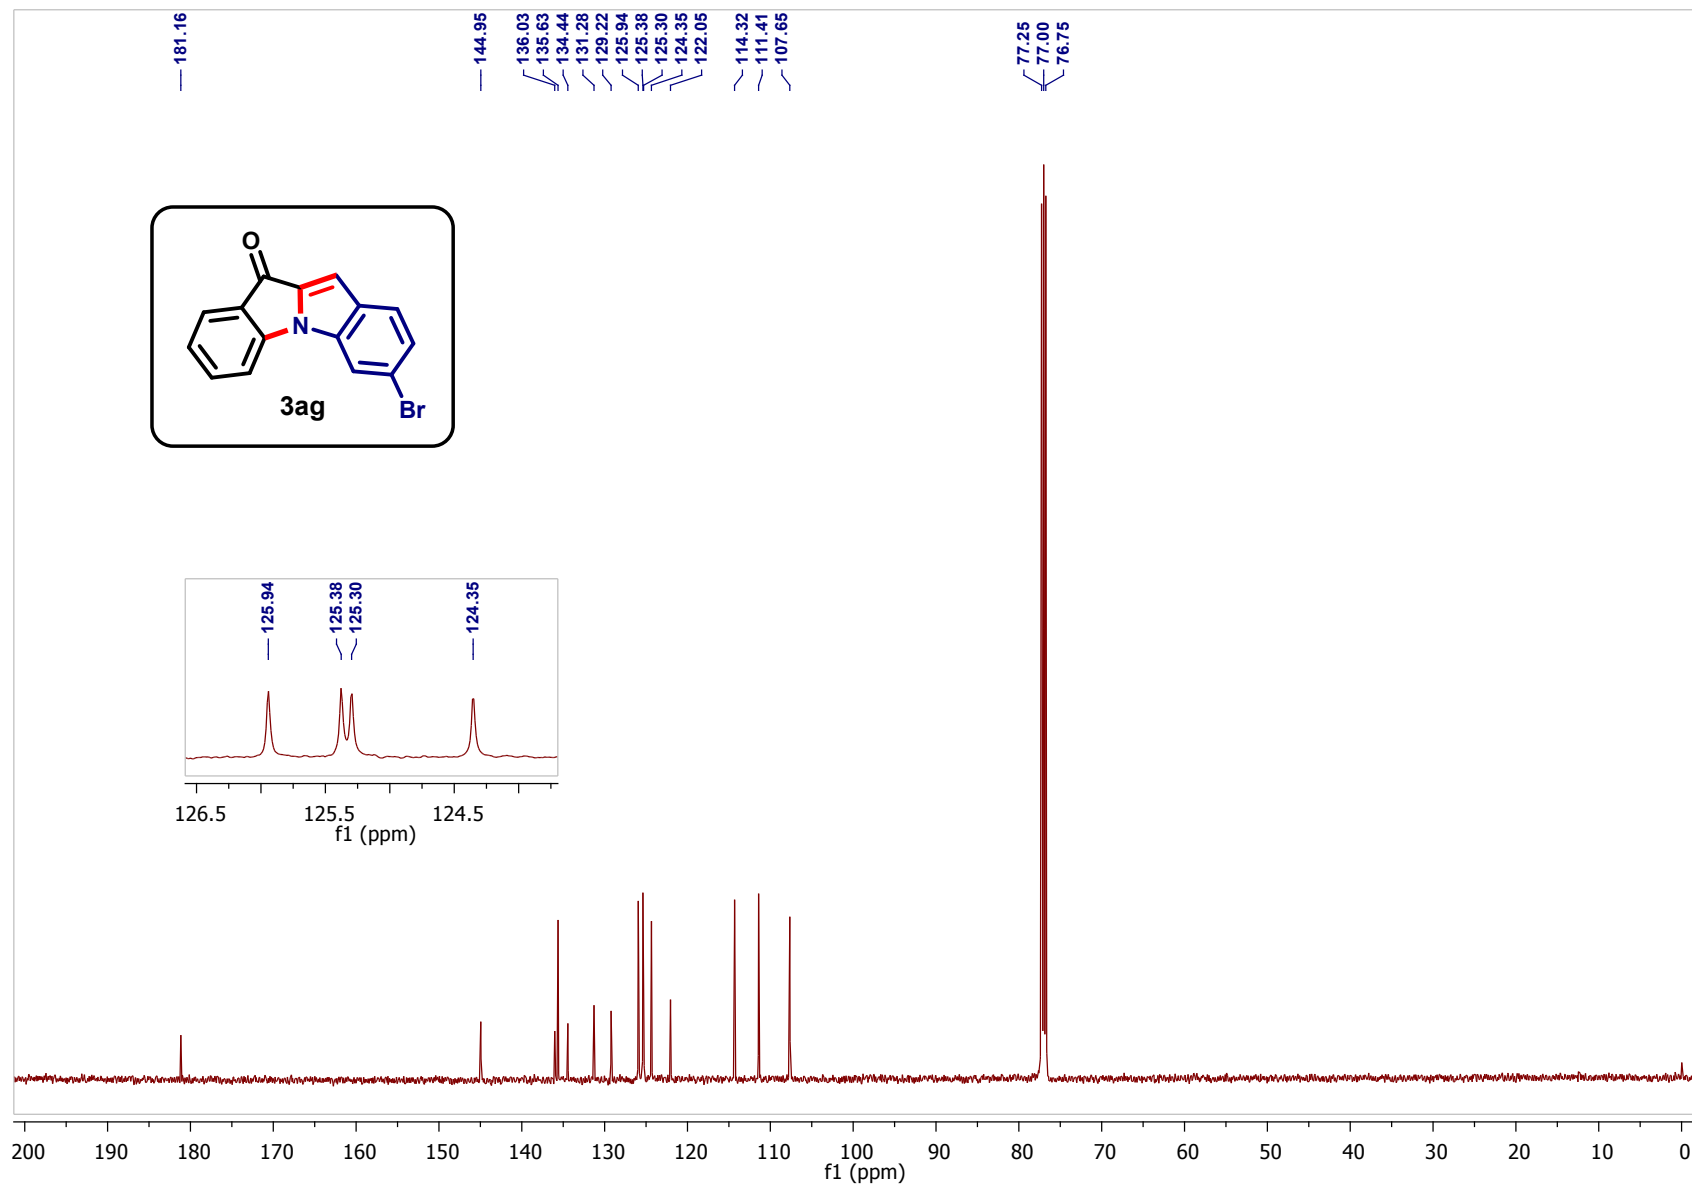

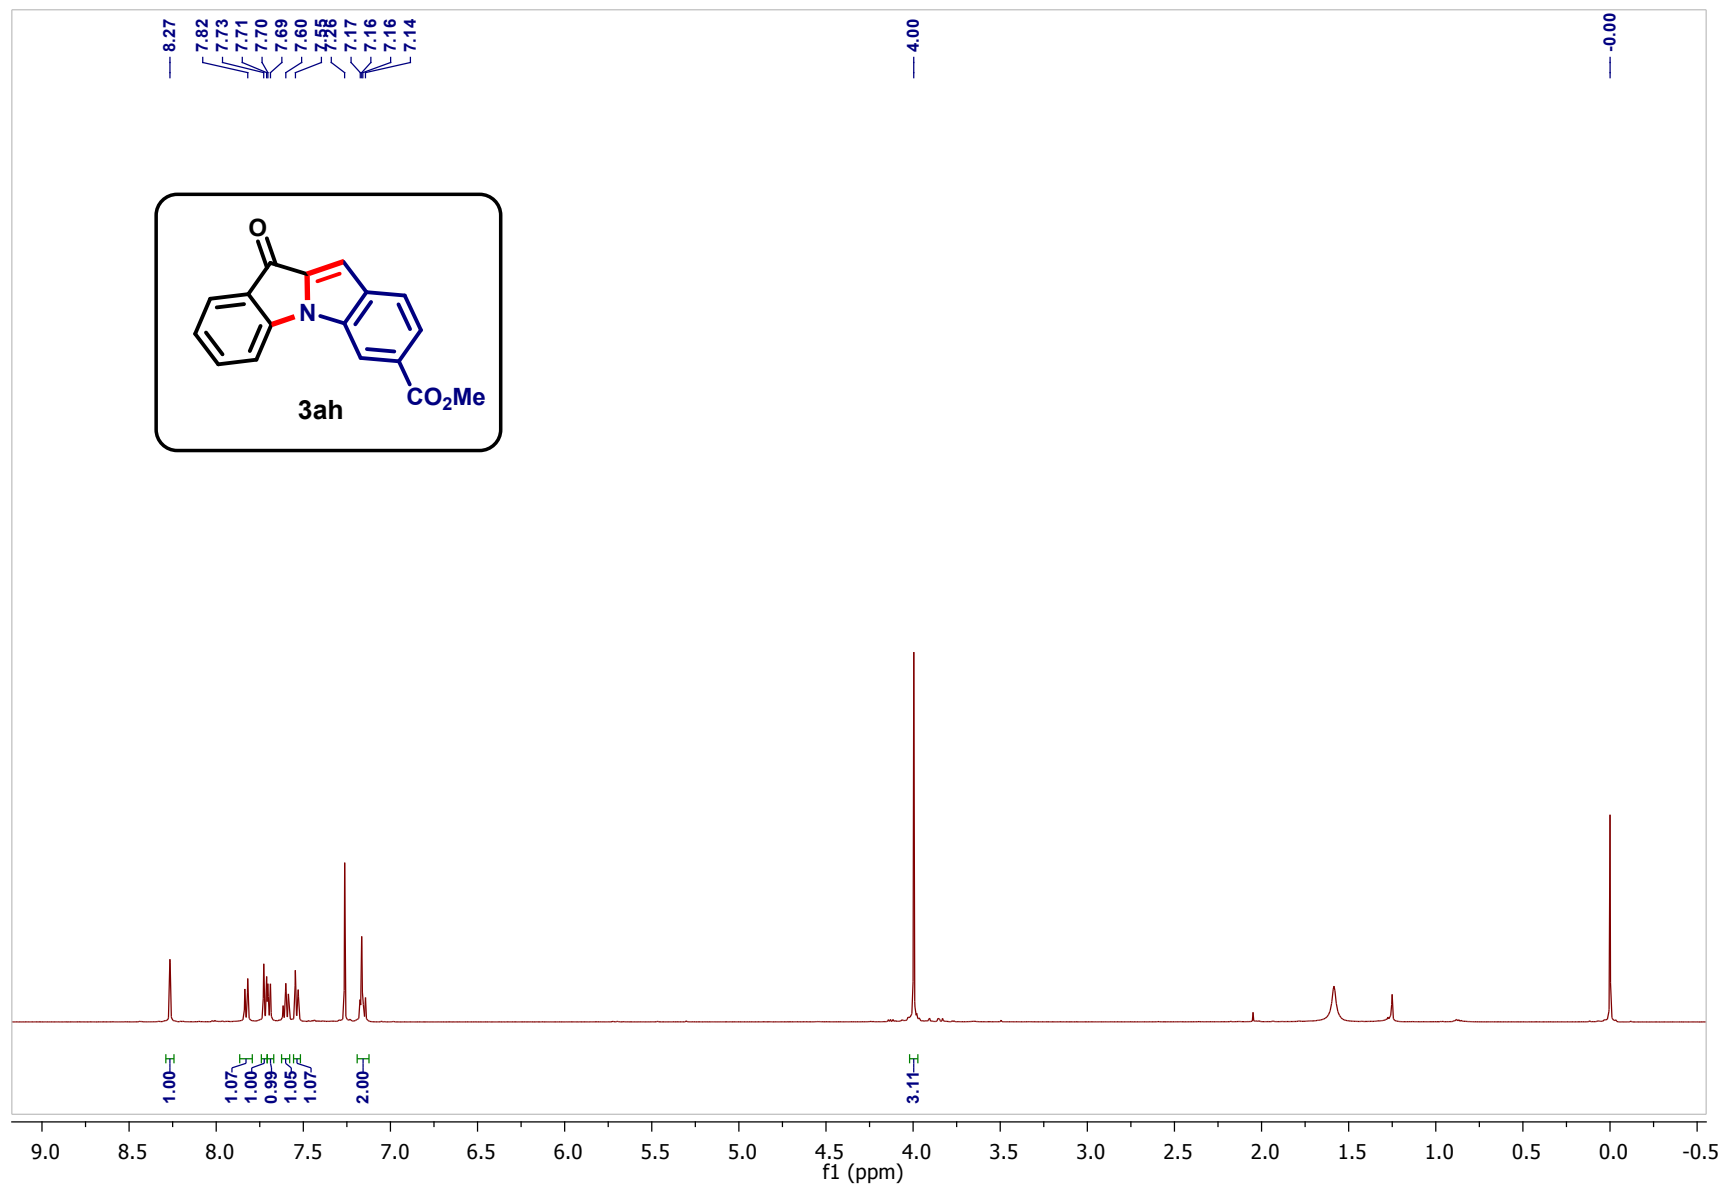

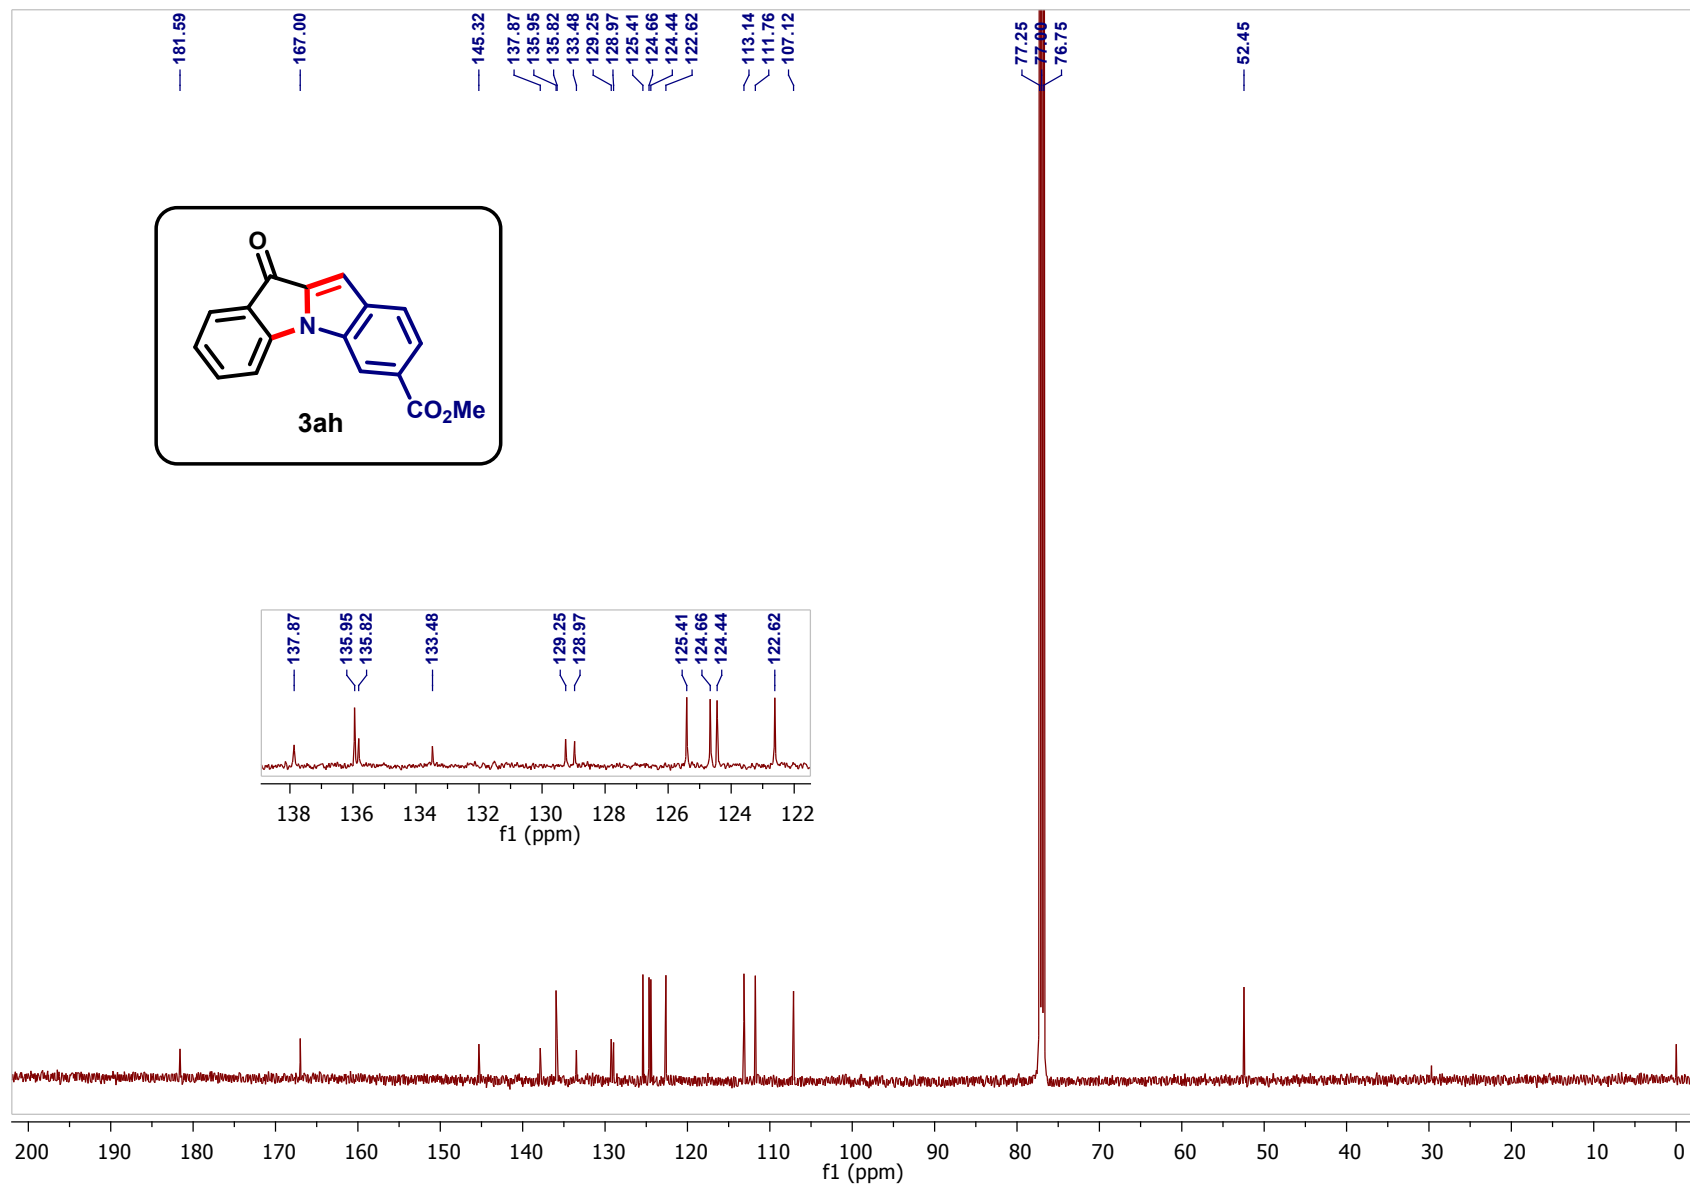

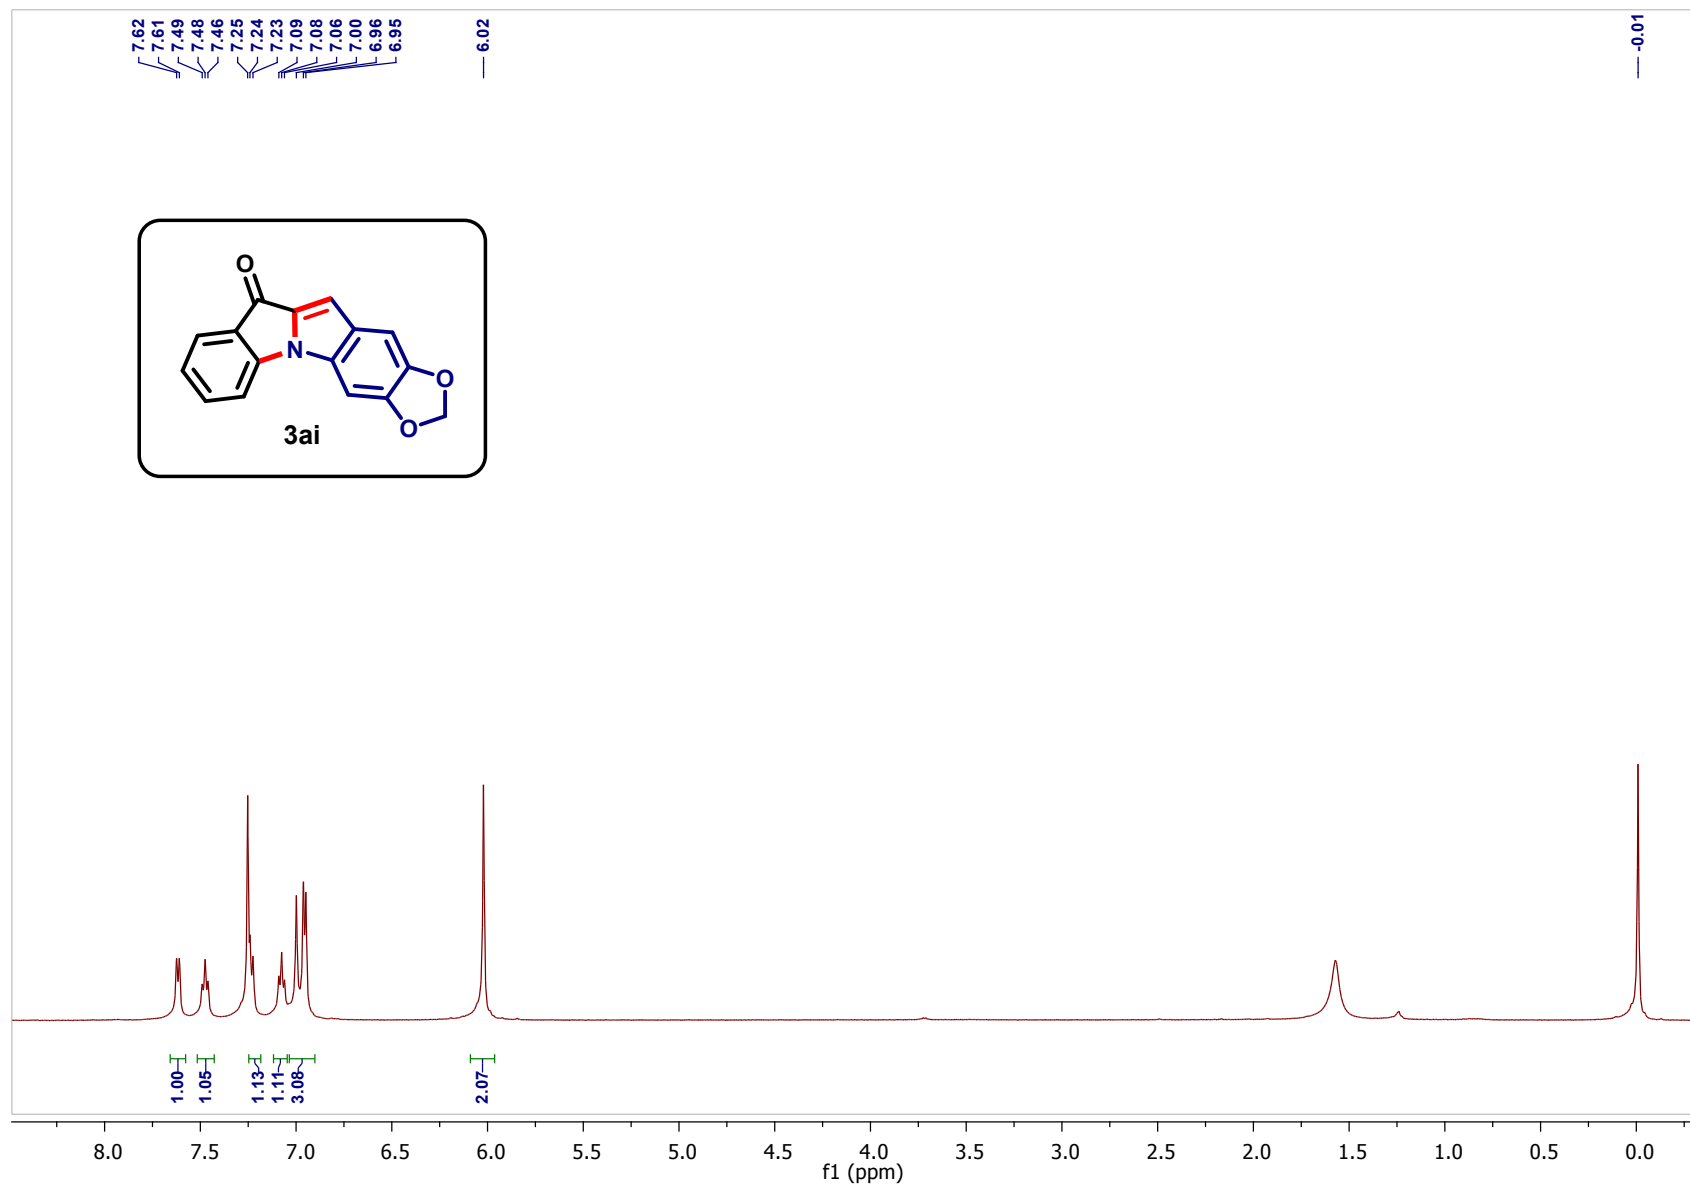

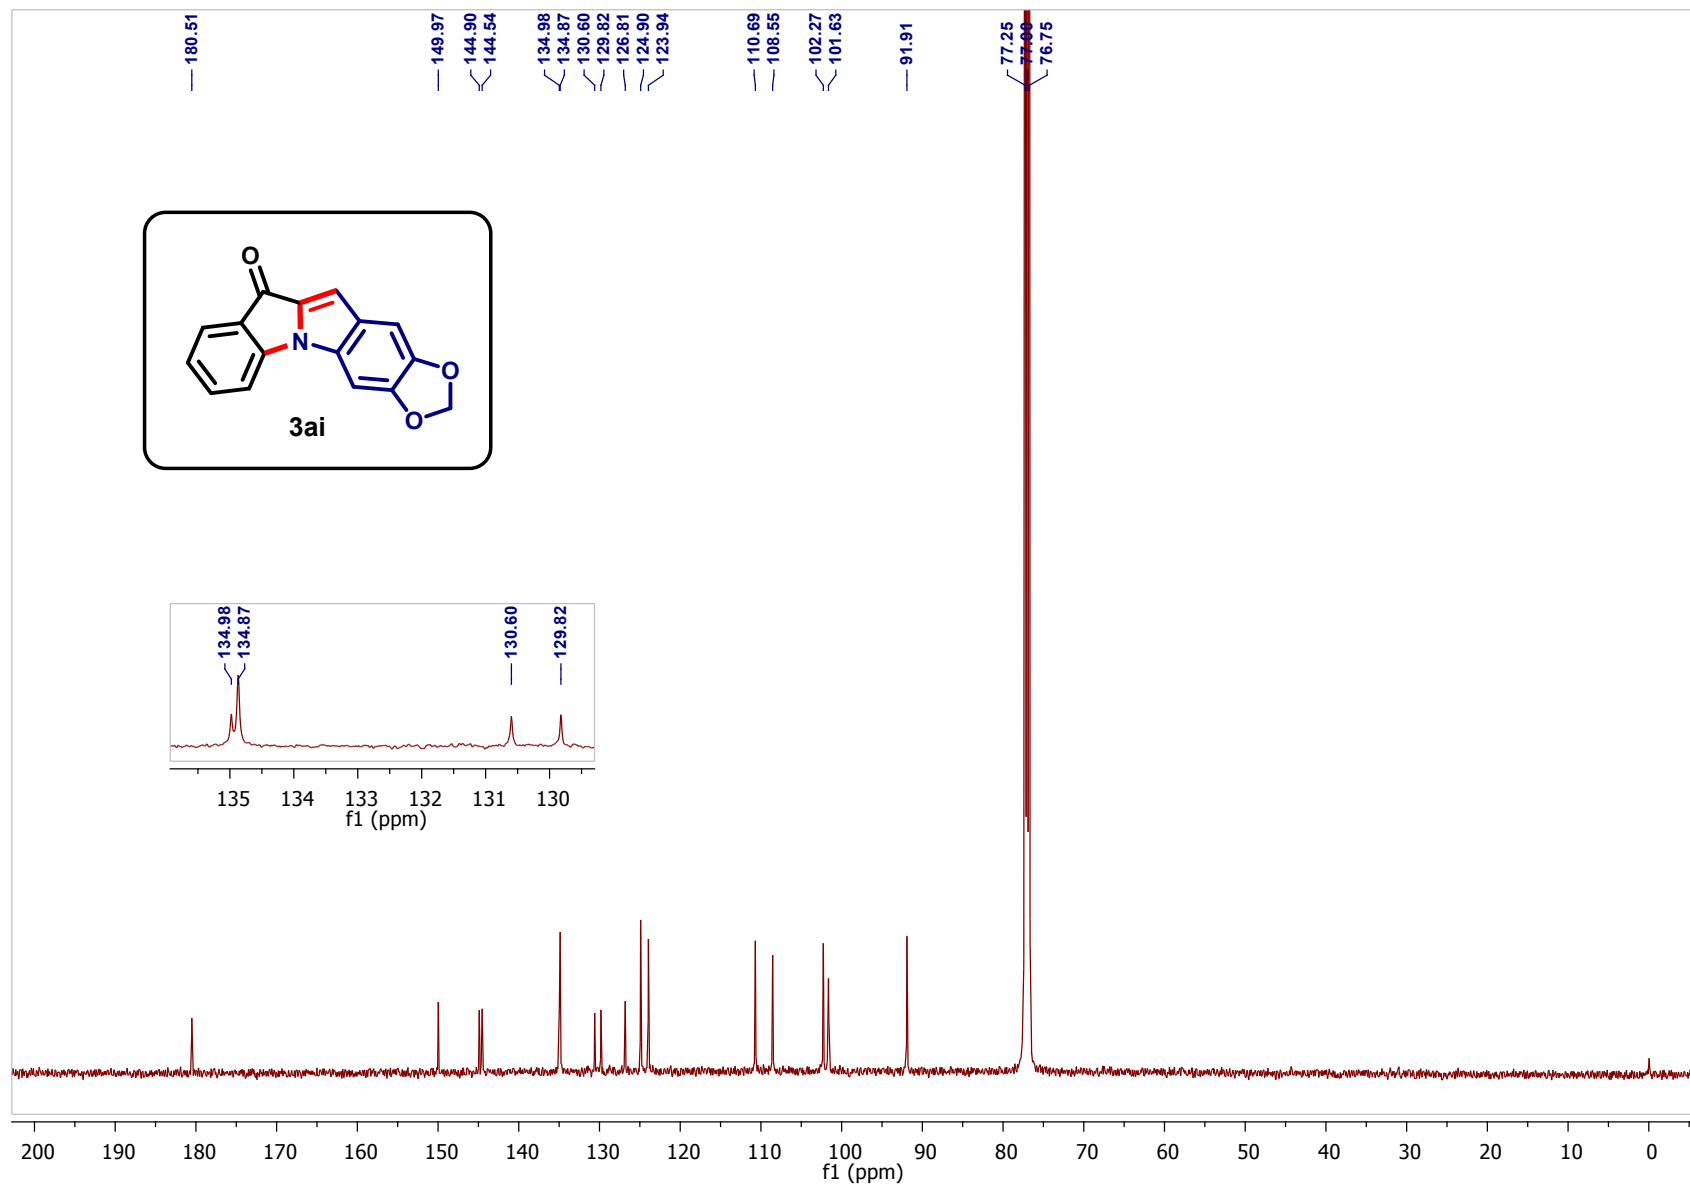

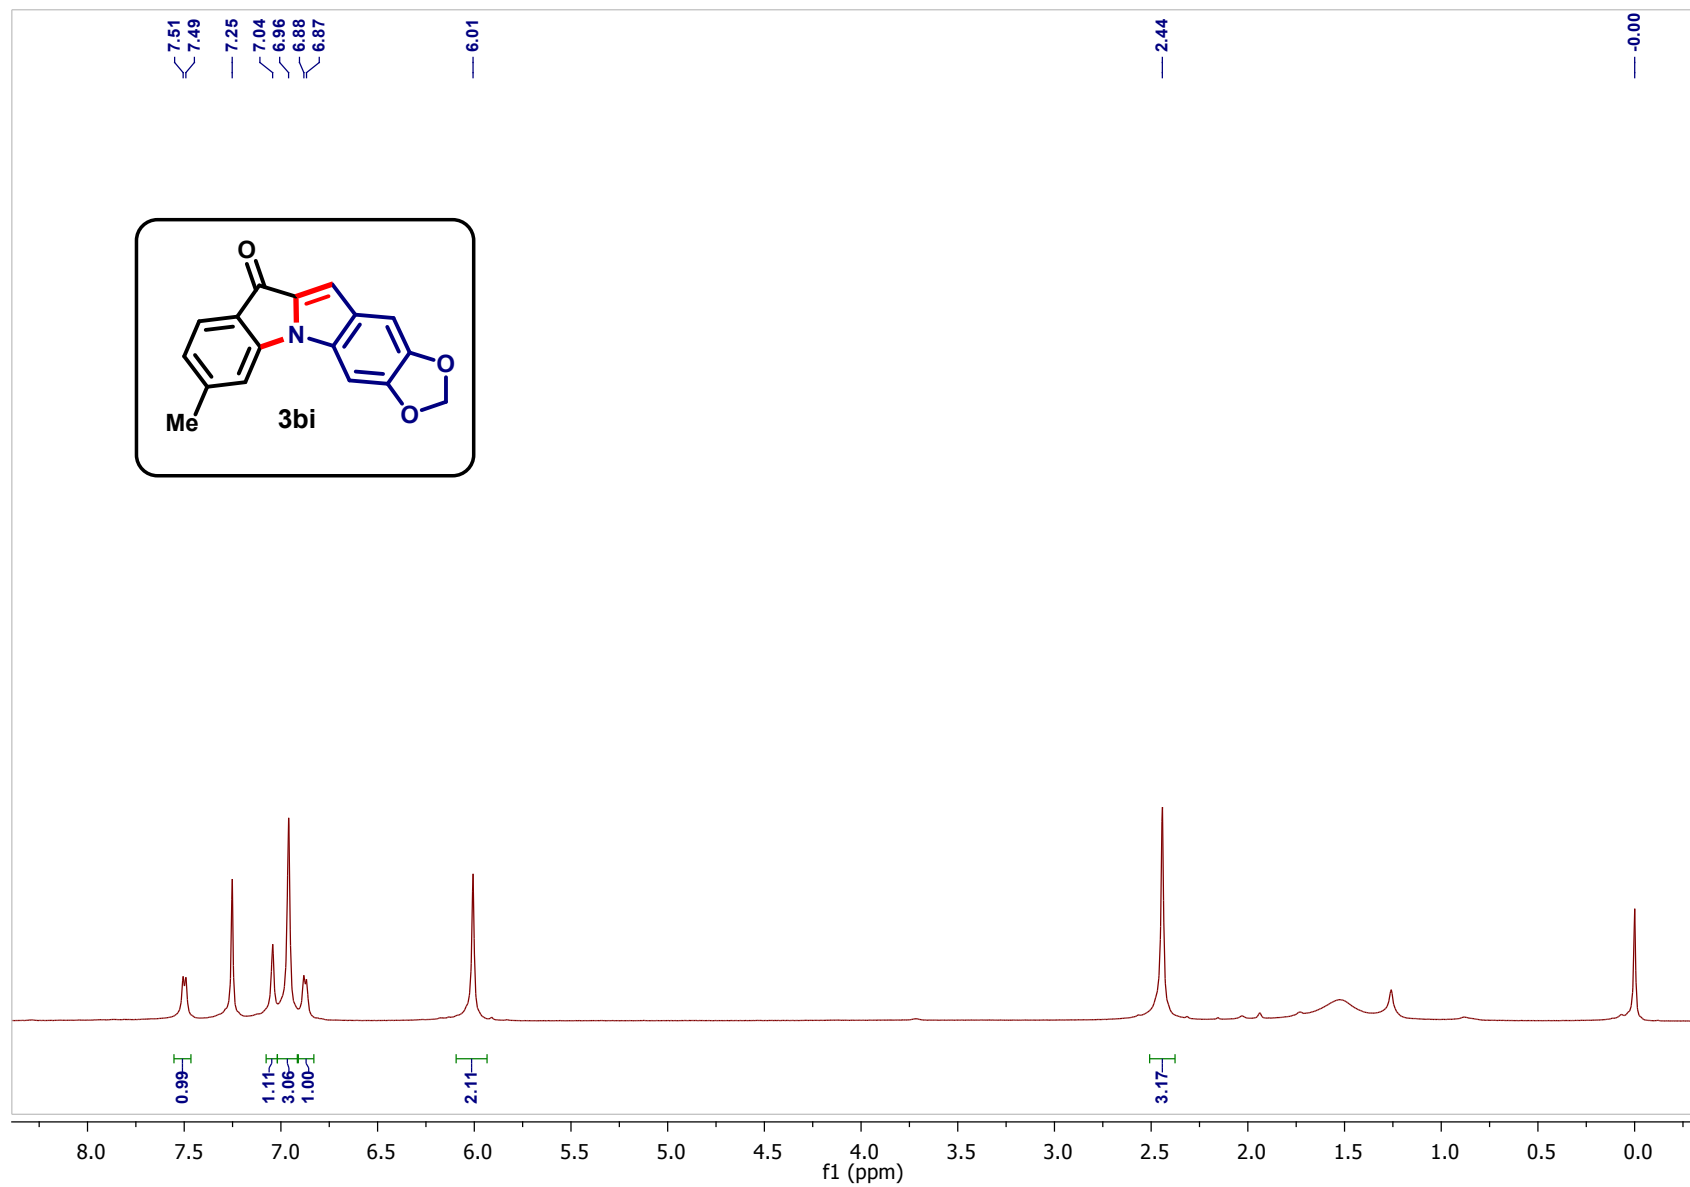

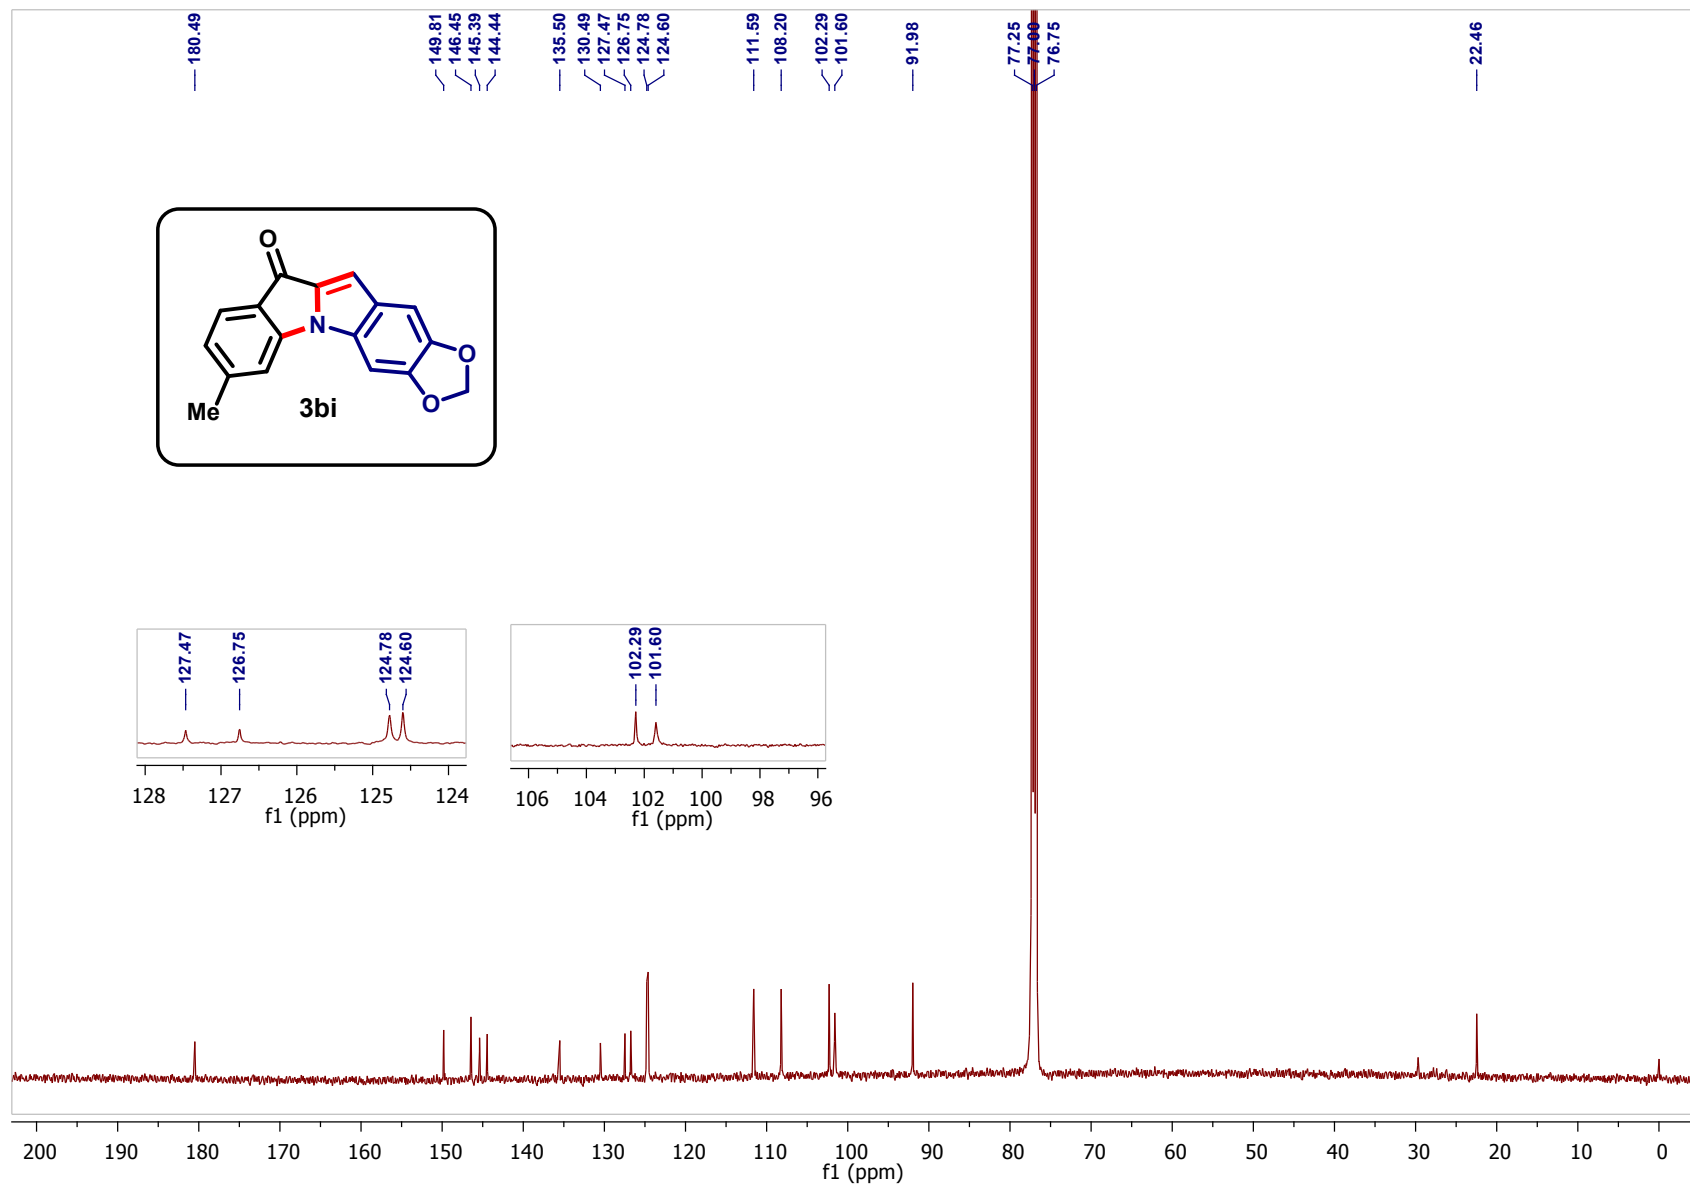

Supplement: d1cc02817k1.pdf [file d1cc02817k1.pdf]
